# Supplementary material for: Comprehensive Analysis of the Immune Cell Infiltration Landscape and Immune-Related Methylation in Retinoblastoma
Source: Front Genet. 2022 May 18;13:864473. doi: 10.3389/fgene.2022.864473 (PMC9157546; doi:10.3389/fgene.2022.864473)
Supplement: Supplementary file 2 [file Table2.CSV]

	logFC	AveExpr	t	P.Value	adj.P.Val	B	High_ICI_AVG	Low_ICI_AVG	deltaBeta	CHR	MAPINFO	Strand	Type	gene	feature	cgi	feat.cgi	UCSC_CpG_Islands_Name	DHS	Enhancer	Phantom	Probe_SNPs	Probe_SNPs_10	DMP
cg13558371	0.111439877245987	0.867117504625137	6.30384933646895	6.31081983820264e-08	0.00234949527732707	7.55369974282334	0.789319854472278	0.900759731718266	0.111439877245987	9	126135610	R	I	CRB2	Body	island	Body-island	chr9:126135407-126136193	NA	NA				Low-ICI hypermethylated probes
cg20883831	-0.329503636691422	0.31468919990975	-6.18788391462345	9.64312514697637e-08	0.00282079319210046	7.13412161891846	0.544720040618856	0.215216403927433	-0.329503636691422	7	150652948	F	I	KCNH2	TSS200	island	TSS200-island	chr7:150652807-150653080	TRUE	TRUE	high-CpG:150283794-150283891			High-ICI hypermethylated probes
cg00934987	0.122573847842755	0.692403384378308	6.16485778572748	1.0489068995196e-07	0.00286369764621775	7.05094295229698	0.606832962299403	0.729406810142158	0.122573847842755	17	56605468	F	II	SEPT4	Body	shelf	Body-shelf	chr17:56609025-56609583	NA	NA				Low-ICI hypermethylated probes
cg01058266	-0.305719047763375	0.351690456346048	-6.08862364267509	1.38526363512874e-07	0.00354563422149833	6.77590050788972	0.565116961388403	0.259397913625029	-0.305719047763375	7	789926	F	I	HEATR2	Body	shelf	Body-shelf	chr7:791984-792238	NA	NA		rs77553511		High-ICI hypermethylated probes
cg22891191	-0.212615898334047	0.277831973762594	-6.04091059835459	1.64832398387611e-07	0.0035861721377884	6.6040417446986	0.426261940524098	0.213646042190051	-0.212615898334047	10	129706234	R	II	PTPRE	5'UTR	island	5'UTR-island	chr10:129705217-129706237	TRUE	NA				High-ICI hypermethylated probes
cg06760423	-0.250003139582306	0.197280997451527	-6.00652453290918	1.86816031009921e-07	0.00382530109576844	6.48032918225751	0.371811491122193	0.121808351539887	-0.250003139582306	7	789945	F	I	HEATR2	Body	shelf	Body-shelf	chr7:791984-792238	NA	NA		rs77553511		High-ICI hypermethylated probes
cg04581293	0.179995492581079	0.622256883082243	5.96594602129519	2.16532667963463e-07	0.00422265511335262	6.3344991967417	0.496599652412434	0.676595144993512	0.179995492581079	3	156889197	R	II		IGR	shelf	IGR-shelf	chr3:156892554-156893036	NA	NA				Low-ICI hypermethylated probes
cg24830559	0.145246415037935	0.738098628537582	5.74793037475504	4.77355420736247e-07	0.00698684802935147	5.5543077783421	0.636700187850722	0.781946602888656	0.145246415037935	4	7048926	R	II	TADA2B	Body	shelf	Body-shelf	chr4:7052317-7052613	NA	NA				Low-ICI hypermethylated probes
cg14632507	0.282154689506225	0.636562646812018	5.67728235273711	6.16080338336091e-07	0.00698684802935147	5.302814954971	0.439586731496351	0.721741421002576	0.282154689506225	3	73468875	R	II	PDZRN3	Body	opensea	Body-opensea		NA	TRUE				Low-ICI hypermethylated probes
cg11580525	-0.173061002751586	0.2579307432952	-5.67328483501776	6.25027577433516e-07	0.00698684802935147	5.28860579277113	0.378746915027439	0.205685912275853	-0.173061002751586	11	118022923	R	II	SCN4B	Body	shore	Body-shore	chr11:118023352-118024194	TRUE	NA				High-ICI hypermethylated probes
cg27550152	0.296133051113188	0.525602871543498	5.66621473793722	6.41168244873921e-07	0.00698684802935147	5.26348085032116	0.31886847737014	0.615001528483328	0.296133051113188	12	25389111	F	II	KRAS	Body	opensea	Body-opensea		NA	TRUE		rs74443087		Low-ICI hypermethylated probes
cg10713839	0.249402898548197	0.643417862503364	5.66295566396051	6.48746969620722e-07	0.00698684802935147	5.25190156626808	0.46930640502632	0.718709303574518	0.249402898548198	4	81047158	F	II		IGR	opensea	IGR-opensea		NA	TRUE		rs73829393		Low-ICI hypermethylated probes
cg05183646	-0.296122142140014	0.268478078925809	-5.64983819417092	6.80158741301474e-07	0.00698684802935147	5.20531181981001	0.475204857400913	0.179082715260899	-0.296122142140014	6	134491143	F	I	SGK1	3'UTR	opensea	3'UTR-opensea		NA	NA				High-ICI hypermethylated probes
cg09513469	-0.223474180647258	0.345712410312002	-5.6417651048682	7.00235293668132e-07	0.00698684802935147	5.17665103092591	0.501722687367635	0.278248506720377	-0.223474180647258	1	6421502	F	II	ACOT7	Body	opensea	Body-opensea		NA	NA				High-ICI hypermethylated probes
cg09938164	-0.153220614150795	0.257694627346314	-5.63947722279311	7.06030924042575e-07	0.00698684802935147	5.16853044174121	0.364659961753472	0.211439347602677	-0.153220614150795	1	22458396	R	II	WNT4	Body	shelf	Body-shelf	chr1:22456023-22456225	NA	TRUE		rs1076680		High-ICI hypermethylated probes
cg00001534	0.162450840297039	0.688183409645825	5.61061179244632	7.83365041877237e-07	0.00717182338439547	5.06614349624815	0.574774332457326	0.737225172754365	0.162450840297039	1	51034865	R	II	FAF1	Body	opensea	Body-opensea		NA	TRUE				Low-ICI hypermethylated probes
cg22489883	-0.170534864589599	0.524385029658604	-5.60652739227657	7.94964765795414e-07	0.00717182338439547	5.05166619216435	0.643437670975871	0.472902806386273	-0.170534864589598	1	2537547	F	II	MMEL1	Body	shore	Body-shore	chr1:2537671-2537886	NA	NA				High-ICI hypermethylated probes
cg00640719	-0.251410168586547	0.409568571693897	-5.56638514423251	9.18416258061282e-07	0.00717182338439547	4.90951841457226	0.585081330895826	0.33367116230928	-0.251410168586547	16	70426268	F	II	ST3GAL2	Body	opensea	Body-opensea		TRUE	TRUE				High-ICI hypermethylated probes
cg11132534	-0.242027687944371	0.573944700828476	-5.55859697832881	9.44478966307077e-07	0.00717182338439547	4.88196913278591	0.742907426374546	0.500879738430176	-0.242027687944371	2	218114431	F	II		IGR	opensea	IGR-opensea		NA	TRUE				High-ICI hypermethylated probes
cg08717931	0.222404289977637	0.357590461129091	5.5388220976442	1.0139902532252e-06	0.00717182338439547	4.8120626622231	0.202327088880552	0.424731378858189	0.222404289977637	1	32617124	F	II	KPNA6	Body	opensea	Body-opensea		NA	TRUE				Low-ICI hypermethylated probes
cg09001514	-0.226393738930589	0.510080401135672	-5.53159488330462	1.04063871712655e-06	0.00717182338439547	4.78652943445256	0.668128860389102	0.441735121458513	-0.226393738930589	5	149679307	F	II	ARSI	Body	shore	Body-shore	chr5:149676978-149677751	TRUE	NA				High-ICI hypermethylated probes
cg01066472	0.314675570046836	0.655868846995591	5.52150164425468	1.0790184041803e-06	0.00717182338439547	4.75088504581654	0.43618967545346	0.750865245500296	0.314675570046836	1	75591029	F	I		IGR	island	IGR-island	chr1:75590817-75591354	NA	NA				Low-ICI hypermethylated probes
cg13842262	-0.206612207083794	0.388366410570281	-5.51002460957153	1.12436406757589e-06	0.00717182338439547	4.71037417008235	0.532605121175948	0.325992914092154	-0.206612207083794	6	170759483	R	II		IGR	shelf	IGR-shelf	chr6:170755650-170755892	NA	NA				High-ICI hypermethylated probes
cg07857792	-0.369955565977921	0.483525986464081	-5.50658626321726	1.13831239038719e-06	0.00717182338439547	4.69824197782397	0.741796853278856	0.371841287300935	-0.369955565977921	19	18060683	R	I	KCNN1	TSS1500	shore	TSS1500-shore	chr19:18061195-18061473	NA	TRUE				High-ICI hypermethylated probes
cg07757252	-0.173974082853704	0.337592469010785	-5.49876528153912	1.1706805524023e-06	0.00717212366730475	4.67065302260518	0.459046074021862	0.285071991168158	-0.173974082853704	3	52274561	R	II	TWF2	TSS1500	shore	TSS1500-shore	chr3:52272839-52273631	TRUE	NA				High-ICI hypermethylated probes
cg11961845	0.123049821927887	0.744569627271885	5.49206908979063	1.19911602328629e-06	0.00717212366730475	4.64703997893078	0.6586669213977	0.781716743325587	0.123049821927887	7	129008179	F	II	AHCYL2	1stExon	opensea	1stExon-opensea		NA	TRUE	low-CpG:128795149-128795534			Low-ICI hypermethylated probes
cg11205173	-0.330486518843049	0.533767769133	-5.47335980888373	1.2822374328496e-06	0.00723522126391548	4.58110491286436	0.764484772853619	0.43399825401057	-0.330486518843049	4	1775077	R	I		IGR	shelf	IGR-shelf	chr4:1772006-1772265	NA	NA				High-ICI hypermethylated probes
cg22211672	-0.170048053306528	0.404810492100472	-5.45869504234001	1.35135214920998e-06	0.00729208300211995	4.52946531674055	0.523523284031444	0.353475230724916	-0.170048053306528	15	74610366	R	II	CCDC33	Body	opensea	Body-opensea		TRUE	TRUE				High-ICI hypermethylated probes
cg18177275	0.233972806014544	0.620688797138165	5.44456125502164	1.42144665970082e-06	0.00729208300211995	4.47973069667225	0.45734929105254	0.691322097067084	0.233972806014544	14	73040574	F	II		IGR	opensea	IGR-opensea		NA	TRUE				Low-ICI hypermethylated probes
cg00923634	0.157106022552468	0.546459464485686	5.41633508475539	1.57236345379055e-06	0.00740142202042563	4.38051212951318	0.436781675156604	0.593887697709073	0.157106022552468	1	25968448	F	II	MAN1C1	Body	opensea	Body-opensea		TRUE	TRUE				Low-ICI hypermethylated probes
cg23160522	-0.252878024607374	0.392222044382597	-5.40824663020576	1.61845757020136e-06	0.00753182335107137	4.35210630770404	0.568759533259442	0.315881508652069	-0.252878024607374	15	75015787	R	II	CYP1A1	5'UTR	shelf	5'UTR-shelf	chr15:75018186-75019336	NA	NA			rs2606344	High-ICI hypermethylated probes
cg06096336	0.346869743749206	0.470250895666888	5.40269973767514	1.65083743545307e-06	0.0075961893437231	4.33263298818052	0.228096546257065	0.574966290006271	0.346869743749206	2	231989800	F	II	PSMD1	Body	opensea	Body-opensea		NA	NA			rs80304316	Low-ICI hypermethylated probes
cg26540004	0.238089205152079	0.622729804086038	5.3830345507171	1.77087590663605e-06	0.00770801086956369	4.26363990249029	0.456516585394964	0.694605790547043	0.238089205152079	5	54932693	R	II	SLC38A9	Body	opensea	Body-opensea		NA	TRUE			rs74993308	Low-ICI hypermethylated probes
cg00740547	0.105759426100343	0.875458490261973	5.38148888129679	1.78066846457934e-06	0.00770801086956369	4.25822008713706	0.801626438078715	0.907385864179058	0.105759426100343	21	46439236	R	I		IGR	island	IGR-island	chr21:46438140-46439343	TRUE	NA				Low-ICI hypermethylated probes
cg24205387	-0.321332545787616	0.402340683327525	-5.38032622396005	1.78806970157829e-06	0.00770801086956369	4.25414357408587	0.626667177556616	0.305334631769	-0.321332545787616	17	1464972	F	I	PITPNA	Body	shore	Body-shore	chr17:1465159-1466312	NA	NA		rs73298827		High-ICI hypermethylated probes
cg26974214	0.163976567086584	0.766218149946999	5.36847982949892	1.86523571979659e-06	0.0078294460087678	4.21262189572562	0.65174394273561	0.815720509822195	0.163976567086584	10	91151885	R	II	IFIT1	TSS1500	opensea	TSS1500-opensea		NA	NA				Low-ICI hypermethylated probes
cg15958034	0.2297502582257	0.453356688130152	5.36170914091248	1.91080734493076e-06	0.00786520453499994	4.18890225756879	0.292964998425418	0.522715256651118	0.2297502582257	13	97889396	F	II	MBNL2	5'UTR	opensea	5'UTR-opensea		NA	TRUE				Low-ICI hypermethylated probes
cg24804060	-0.184854970340917	0.41981388197504	-5.36028047496618	1.92056292762851e-06	0.00786520453499994	4.18389832569057	0.548863578250775	0.364008607909858	-0.184854970340917	17	48425014	R	II	XYLT2	Body	shore	Body-shore	chr17:48422989-48423564	NA	NA				High-ICI hypermethylated probes
cg05203213	-0.226836864503027	0.408784366381921	-5.35741107445	1.94030539787871e-06	0.00786738127100671	4.17384934122115	0.567142177450072	0.340305312947045	-0.226836864503028	2	73419551	R	II		IGR	opensea	IGR-opensea		NA	TRUE				High-ICI hypermethylated probes
cg02590060	-0.24391898856733	0.451872714749833	-5.35038977582766	1.98946383933478e-06	0.00797262367702977	4.14926640500592	0.622155782240233	0.378236793672903	-0.24391898856733	1	53685388	F	II	C1orf123	Body	shore	Body-shore	chr1:53685945-53686391	NA	NA				High-ICI hypermethylated probes
cg13172153	-0.310474766748057	0.535012517560695	-5.34712141748792	2.01276437588402e-06	0.00797262367702977	4.13782639935928	0.75175905283764	0.441284286089583	-0.310474766748057	1	201391747	F	II	TNNI1	TSS1500	opensea	TSS1500-opensea		NA	NA				High-ICI hypermethylated probes
cg27121538	0.224154506567367	0.602525042093158	5.33799022217422	2.07929991024926e-06	0.00797262367702977	4.1058757871274	0.44603982052726	0.670194327094627	0.224154506567367	15	91646263	R	II	SV2B	5'UTR	shelf	5'UTR-shelf	chr15:91642908-91643702	NA	NA				Low-ICI hypermethylated probes
cg18693985	0.1397296498649	0.733389331207396	5.33344130653184	2.11325215403486e-06	0.00797262367702977	4.08996474160351	0.635842217150768	0.775571867015667	0.1397296498649	5	173351052	R	II	CPEB4	Body	opensea	Body-opensea		NA	TRUE				Low-ICI hypermethylated probes
cg14026238	-0.206148165419156	0.513501090269881	-5.32844701889957	2.15115933873376e-06	0.00797262367702977	4.07250041983423	0.657415847260613	0.451267681841456	-0.206148165419156	15	57616123	F	II		IGR	shelf	IGR-shelf	chr15:57618436-57618706	TRUE	NA		rs12101601		High-ICI hypermethylated probes
cg16227748	0.298749317322341	0.499338498233264	5.3271724821697	2.16094027766321e-06	0.00797262367702977	4.06804430563169	0.290777654064837	0.589526971387178	0.298749317322341	2	232186992	R	I	ARMC9	Body	opensea	Body-opensea		NA	NA				Low-ICI hypermethylated probes
cg24606807	-0.387583886686672	0.554150904553851	-5.32155731487671	2.20455727953068e-06	0.00798653784288388	4.04841590835773	0.824728334882282	0.43714444819561	-0.387583886686672	21	43782500	R	II	TFF1	3'UTR	opensea	3'UTR-opensea		NA	NA				High-ICI hypermethylated probes
cg07134182	0.250456019611672	0.455813255497445	5.31018749602541	2.29555427704336e-06	0.00798653784288388	4.00869007431199	0.280966600296844	0.531422619908516	0.250456019611672	1	166920681	R	II	ILDR2	Body	shelf	Body-shelf	chr1:166916865-166917215	NA	TRUE				Low-ICI hypermethylated probes
cg03184472	0.115418815110389	0.782221287539243	5.30629529999225	2.32754928899284e-06	0.00798653784288388	3.9950965809035	0.701645888311236	0.817064703421625	0.115418815110389	2	39174738	R	II	LOC100271715	Body	opensea	Body-opensea		TRUE	TRUE				Low-ICI hypermethylated probes
cg25052274	-0.215656555952318	0.481034649324829	-5.30472653739891	2.34056912286649e-06	0.00798653784288388	3.98961850810943	0.631587339329277	0.415930783376959	-0.215656555952318	1	3321139	F	II	PRDM16	Body	shore	Body-shore	chr1:3321269-3322310	NA	NA		rs41315264		High-ICI hypermethylated probes
cg13061570	-0.206644479408699	0.394097478301365	-5.30418692338176	2.34506421107374e-06	0.00798653784288388	3.98773430224027	0.538358718643287	0.331714239234588	-0.206644479408699	1	2127505	R	II	C1orf86	Body	shore	Body-shore	chr1:2126048-2126642	NA	NA				High-ICI hypermethylated probes
cg14286732	0.158087462240899	0.649886012455366	5.29985415452063	2.38146732320999e-06	0.00798653784288388	3.97260733890244	0.53952306711738	0.697610529358279	0.158087462240899	9	90208854	R	II	DAPK1	Body	opensea	Body-opensea		NA	TRUE				Low-ICI hypermethylated probes
cg04876127	-0.370239471513522	0.562990618455169	-5.29918470606609	2.38714144289421e-06	0.00798653784288388	3.97027042441416	0.821459683474043	0.451220211960521	-0.370239471513522	1	33618450	R	I	TRIM62	Body	opensea	Body-opensea		TRUE	TRUE				High-ICI hypermethylated probes
cg13430053	-0.338143608368219	0.470328862660065	-5.27946876424735	2.56036812625323e-06	0.00802526911954708	3.90148524486003	0.706391381709576	0.368247773341357	-0.338143608368219	2	150932623	R	II		IGR	opensea	IGR-opensea		NA	TRUE				High-ICI hypermethylated probes
cg10943921	-0.24202004161822	0.591401929318504	-5.27453974339371	2.60557892256783e-06	0.00802526911954708	3.8843007893971	0.760359316863299	0.518339275245079	-0.24202004161822	3	129279429	F	II	PLXND1	Body	opensea	Body-opensea		TRUE	TRUE	low-CpG:130762056-130762136		rs1872115	High-ICI hypermethylated probes
cg06623295	0.189781664844347	0.691505920938118	5.26748235356388	2.67168669646653e-06	0.00802526911954708	3.85970441772289	0.559016834159989	0.748798499004336	0.189781664844347	17	77539754	F	II		IGR	opensea	IGR-opensea		NA	NA		rs74575358		Low-ICI hypermethylated probes
cg24830730	-0.431471384137051	0.566264655729231	-5.26106985207859	2.73318745570767e-06	0.00805259946752617	3.83736421485214	0.867480527673965	0.436009143536914	-0.431471384137051	7	150653195	F	I	KCNH2	Body	shore	Body-shore	chr7:150655108-150655643	TRUE	TRUE				High-ICI hypermethylated probes
cg20797699	-0.142838319644243	0.221713144709803	-5.25727753372167	2.77021390248802e-06	0.00808747280415079	3.82415621332578	0.321430462197293	0.17859214255305	-0.142838319644243	17	61776851	R	II	LIMD2	5'UTR	shore	5'UTR-shore	chr17:61776890-61778733	NA	NA				High-ICI hypermethylated probes
cg18270687	-0.309568373507714	0.413230757248891	-5.2491378199369	2.85136572581309e-06	0.00810908611270368	3.79581673152841	0.629344527433521	0.319776153925807	-0.309568373507714	1	39035982	F	II		IGR	opensea	IGR-opensea		NA	NA				High-ICI hypermethylated probes
cg18565264	-0.201877410396059	0.432459744233342	-5.23185791139813	3.03149912809687e-06	0.00856191525471034	3.73569890863511	0.573393030736251	0.371515620340192	-0.201877410396059	1	2140551	R	I	C1orf86	TSS1500	shelf	TSS1500-shelf	chr1:2144199-2144497	TRUE	NA				High-ICI hypermethylated probes
cg04674529	-0.343767159559468	0.517627073591865	-5.22960108868347	3.05583909625759e-06	0.00857154494338347	3.72785177944771	0.757615468001305	0.413848308441837	-0.343767159559468	5	157795991	R	II		IGR	opensea	IGR-opensea		NA	TRUE				High-ICI hypermethylated probes
cg04479876	0.201292056583931	0.679484524126709	5.22363110202492	3.1211591203274e-06	0.00866020878502024	3.70709875329819	0.538959880851135	0.740251937435065	0.20129205658393	5	38479736	F	II	LIFR	3'UTR	opensea	3'UTR-opensea		NA	NA				Low-ICI hypermethylated probes
cg16108580	-0.337750506121826	0.456492613998862	-5.22050228249331	3.15594088979864e-06	0.00866020878502024	3.69622519207056	0.69228070317825	0.354530197056424	-0.337750506121827	1	112135849	R	II		IGR	opensea	IGR-opensea		TRUE	TRUE				High-ICI hypermethylated probes
cg21900928	0.210286269840577	0.664889213345807	5.2192152343911	3.17035919027326e-06	0.00866020878502024	3.69175290941894	0.518085591004272	0.728371860844849	0.210286269840578	7	29294897	F	II	CHN2	Body	opensea	Body-opensea		NA	TRUE				Low-ICI hypermethylated probes
cg23906459	-0.131167482235493	0.14768401841476	-5.2190659067104	3.17203625106351e-06	0.00866020878502024	3.69123404214496	0.239253770164067	0.108086287928573	-0.131167482235493	8	143530680	R	I		IGR	island	IGR-island	chr8:143530645-143530872	NA	NA				High-ICI hypermethylated probes
cg18170989	0.418727381139098	0.483856472460982	5.20676158805157	3.31327162293338e-06	0.008868437089238	3.64849620466407	0.19153735732614	0.610264738465238	0.418727381139098	13	49975383	R	II	CAB39L	5'UTR	opensea	5'UTR-opensea		NA	TRUE				Low-ICI hypermethylated probes
cg10007051	-0.304897291392311	0.345025967154633	-5.19218139280755	3.48867542599374e-06	0.00893174174974181	3.59789412108258	0.557878793220964	0.252981501828652	-0.304897291392311	7	90983258	R	II		IGR	opensea	IGR-opensea		NA	TRUE				High-ICI hypermethylated probes
cg17777592	0.356168970136855	0.516683872105312	5.19201307216649	3.49075291294686e-06	0.00893174174974181	3.59731020671632	0.2680376099343	0.624206580071155	0.356168970136855	13	49975418	R	II	CAB39L	5'UTR	opensea	5'UTR-opensea		NA	TRUE				Low-ICI hypermethylated probes
cg13912214	0.22908796214611	0.422822837305458	5.19001749882157	3.51547630726533e-06	0.00893174174974181	3.59038789734638	0.262893505241192	0.491981467387302	0.22908796214611	7	129343142	F	II	NRF1	Body	opensea	Body-opensea		NA	TRUE		rs79726244		Low-ICI hypermethylated probes
cg04046629	-0.119874666902513	0.119466368902692	-5.18744702808505	3.54757674330256e-06	0.00893174174974181	3.58147260024007	0.203152457117653	0.0832777902151407	-0.119874666902513	11	60775831	F	II	CD6	Body	island	Body-island	chr11:60775036-60776307	TRUE	NA		rs35287148		High-ICI hypermethylated probes
cg22491320	0.104526083972066	0.826703963884611	5.18512429424973	3.5768318664936e-06	0.00893174174974181	3.57341773964262	0.753732924130528	0.858259008102593	0.104526083972066	2	133998732	R	II	NCKAP5	Body	opensea	Body-opensea		NA	TRUE				Low-ICI hypermethylated probes
cg26864036	-0.389970625685924	0.598886703624305	-5.17869594169645	3.65904357788927e-06	0.00903651030935419	3.55113120934818	0.871130347971083	0.481159722285158	-0.389970625685925	16	83974716	R	I		IGR	opensea	IGR-opensea		NA	TRUE				High-ICI hypermethylated probes
cg23240213	-0.138659186862348	0.711453193683613	-5.17653579831736	3.68708548980272e-06	0.00903651030935419	3.54364414819097	0.808253003379969	0.669593816517621	-0.138659186862347	2	9940969	F	I		IGR	opensea	IGR-opensea		NA	TRUE		rs75054026		High-ICI hypermethylated probes
cg21335556	-0.273072228871209	0.511652862882781	-5.17364905970546	3.72489068530813e-06	0.00903651030935419	3.53364025373085	0.702288192472116	0.429215963600906	-0.273072228871209	17	8703341	R	II	MFSD6L	TSS1500	shore	TSS1500-shore	chr17:8702342-8702824	NA	NA				High-ICI hypermethylated probes
cg00134934	-0.356733674975585	0.484050524827787	-5.17234722362491	3.7420645205039e-06	0.00903651030935419	3.52912936499102	0.733091014905082	0.376357339929497	-0.356733674975585	16	20271668	R	II		IGR	opensea	IGR-opensea		NA	TRUE				High-ICI hypermethylated probes
cg21545013	-0.341690981798664	0.516147544933666	-5.17165844308025	3.75118247093032e-06	0.00903651030935419	3.52674287224497	0.754686532227073	0.412995550428409	-0.341690981798664	1	8407891	R	II		IGR	shelf	IGR-shelf	chr1:8403697-8404102	NA	NA				High-ICI hypermethylated probes
cg16348158	-0.208171174772017	0.457524343822186	-5.16608506265888	3.82577193760399e-06	0.00907394130426921	3.50743589818695	0.602851390361141	0.394680215589124	-0.208171174772017	1	3036916	R	II	PRDM16	Body	shore	Body-shore	chr1:3038067-3038343	NA	NA				High-ICI hypermethylated probes
cg13224914	0.16380596632754	0.691749448308354	5.16553648917079	3.83319214320598e-06	0.00907394130426921	3.50553592115569	0.577394339740072	0.741200306067612	0.16380596632754	10	12750368	F	II	CAMK1D	Body	opensea	Body-opensea		NA	TRUE		rs1007553		Low-ICI hypermethylated probes
cg17205313	0.154419297312144	0.700189967825114	5.1515271821874	4.02756871319642e-06	0.0093186107618106	3.45703675574455	0.592387816871353	0.746807114183497	0.154419297312144	18	21572748	F	II	TTC39C	5'UTR	opensea	5'UTR-opensea		NA	TRUE				Low-ICI hypermethylated probes
cg16060740	-0.173214446733995	0.337716421892281	-5.14340705645862	4.14464783010693e-06	0.0094296724848465	3.4289448731493	0.458639714895258	0.285425268161263	-0.173214446733995	1	1023891	F	I	C1orf159	Body	shore	Body-shore	chr1:1024075-1024614	NA	NA				High-ICI hypermethylated probes
cg03253556	-0.206113071887081	0.536508521805962	-5.13784735860005	4.2267375549222e-06	0.00947442836564981	3.40971914206345	0.680398779538452	0.474285707651372	-0.206113071887081	2	27505196	R	II	TRIM54	TSS1500	opensea	TSS1500-opensea		NA	TRUE				High-ICI hypermethylated probes
cg08024548	-0.236256416876373	0.457266105261374	-5.13583390581474	4.25685992899001e-06	0.00947442836564981	3.40275817588982	0.62219983025054	0.385943413374168	-0.236256416876373	7	1468312	F	II		IGR	opensea	IGR-opensea		NA	NA		rs35757754		High-ICI hypermethylated probes
cg02527419	-0.221111585247679	0.563195817163463	-5.13316771960294	4.29707327311042e-06	0.00948844305833491	3.39354192316606	0.71755673516656	0.496445149918881	-0.22111158524768	5	314558	R	II	AHRR	Body	opensea	Body-opensea		NA	NA				High-ICI hypermethylated probes
cg18065794	-0.203210544516203	0.283157026397654	-5.13082839952917	4.33266471947722e-06	0.00948844305833491	3.38545683460946	0.425020991437268	0.221810446921065	-0.203210544516203	5	1745726	R	II		IGR	island	IGR-island	chr5:1745534-1745851	NA	NA				High-ICI hypermethylated probes
cg26801613	-0.187031258086469	0.356962988820838	-5.12805161384496	4.3752891197101e-06	0.00952726715212839	3.37586134634332	0.487531980315166	0.300500722228697	-0.187031258086469	1	87793510	R	II	LMO4	TSS1500	shore	TSS1500-shore	chr1:87793802-87795142	NA	NA				High-ICI hypermethylated probes
cg25315503	-0.242028449103248	0.464167207389436	-5.12363564937552	4.44392780526716e-06	0.00952726715212839	3.36060498176961	0.633130464310572	0.391102015207324	-0.242028449103248	21	45247038	R	II		IGR	shore	IGR-shore	chr21:45246251-45246490	TRUE	NA				High-ICI hypermethylated probes
cg05957504	0.173628220486439	0.739336133622516	5.12108987419481	4.48397850992709e-06	0.00952726715212839	3.35181173495716	0.618123979698021	0.79175220018446	0.173628220486439	5	124014639	F	II	ZNF608	Body	opensea	Body-opensea		NA	TRUE				Low-ICI hypermethylated probes
cg13796250	0.371166996704235	0.522719430161929	5.12027008736369	4.49695111493358e-06	0.00952726715212839	3.34898045038426	0.263602847557086	0.634769844261321	0.371166996704235	6	108169200	R	I		IGR	shore	IGR-shore	chr6:108169396-108169790	NA	NA				Low-ICI hypermethylated probes
cg21596498	-0.375768044156083	0.542048907814376	-5.11966721144773	4.50651482995625e-06	0.00952726715212839	3.34689840213476	0.804377542413906	0.428609498257823	-0.375768044156083	19	42618407	R	II	POU2F2	Body	opensea	Body-opensea		TRUE	TRUE				High-ICI hypermethylated probes
cg15994861	-0.220701128021309	0.250037877565224	-5.11759458151594	4.53954707909779e-06	0.00952726715212839	3.33974113075827	0.404112249957458	0.183411121936149	-0.220701128021309	4	6495561	F	II		IGR	opensea	IGR-opensea		NA	TRUE		rs4554149	rs34164549	High-ICI hypermethylated probes
cg12609526	0.205630512987104	0.591185924116523	5.1163330022024	4.55976998241177e-06	0.00952726715212839	3.33538506974978	0.447632547125526	0.65326306011263	0.205630512987104	1	116902548	F	II		IGR	opensea	IGR-opensea		NA	TRUE				Low-ICI hypermethylated probes
cg11200797	-0.203833728598831	0.563920494564831	-5.11150664910537	4.63795809529119e-06	0.00958021813022515	3.318723583588	0.70621951264326	0.502385784044429	-0.203833728598831	1	1016470	R	I		IGR	shore	IGR-shore	chr1:1016863-1017439	NA	NA				High-ICI hypermethylated probes
cg06800658	-0.139425573516841	0.189690411455991	-5.10878024334512	4.68270875779707e-06	0.00958021813022515	3.30931379718306	0.287025245797936	0.147599672281095	-0.139425573516841	5	134881970	R	II		IGR	shelf	IGR-shelf	chr5:134879443-134879819	NA	NA				High-ICI hypermethylated probes
cg06889348	-0.140982992830784	0.256483536277279	-5.10835680343198	4.68969706684096e-06	0.00958021813022515	3.30785250508084	0.354905625611978	0.213922632781193	-0.140982992830784	1	114895466	F	II		IGR	opensea	IGR-opensea		NA	TRUE				High-ICI hypermethylated probes
cg06710694	-0.172607086274509	0.655099218142622	-5.10760803834349	4.70207958511854e-06	0.00958021813022515	3.3052686126396	0.775598504787091	0.602991418512582	-0.172607086274509	22	29729314	R	I	AP1B1	Body	opensea	Body-opensea		NA	NA				High-ICI hypermethylated probes
cg07056567	-0.168324146976996	0.27750333966656	-5.10501680195785	4.74518060133373e-06	0.00962017243040493	3.29632755068462	0.395012649820313	0.226688502843316	-0.168324146976996	7	100273943	R	II	GNB2	Body	island	Body-island	chr7:100270875-100274003	NA	NA				High-ICI hypermethylated probes
cg17142931	-0.214048230262257	0.421158370600201	-5.10252260366849	4.78703501826006e-06	0.00965721824082744	3.28772273188132	0.57058826719838	0.356540036936123	-0.214048230262257	1	942295	F	II		IGR	opensea	IGR-opensea		TRUE	NA				High-ICI hypermethylated probes
cg02059849	-0.177096408288028	0.316730582457957	-5.09505816495093	4.91447809664988e-06	0.00969575428324571	3.26197921794203	0.440363924092996	0.263267515804967	-0.177096408288028	8	142437898	R	II	PTP4A3	Body	shore	Body-shore	chr8:142439683-142440547	NA	TRUE			rs59354693	High-ICI hypermethylated probes
cg07615364	-0.301310521478918	0.506568837694862	-5.0945235526675	4.92373290018056e-06	0.00969575428324571	3.2601359146812	0.71691769231222	0.415607170833302	-0.301310521478918	3	52088726	F	II	DUSP7	Body	shore	Body-shore	chr3:52089652-52090845	NA	NA				High-ICI hypermethylated probes
cg20421058	-0.303137393862971	0.620952921711407	-5.09328573029186	4.94522707558122e-06	0.00969575428324571	3.25586824167877	0.832577140068575	0.529439746205605	-0.303137393862971	4	7337225	F	I	SORCS2	Body	opensea	Body-opensea		TRUE	TRUE		rs11942531		High-ICI hypermethylated probes
cg03190267	-0.155733406970444	0.291796427789604	-5.09311548864684	4.94819045725632e-06	0.00969575428324571	3.2552813219578	0.400515976051989	0.244782569081545	-0.155733406970444	16	2523468	F	II	NTN3	Body	island	Body-island	chr16:2521086-2525929	NA	NA				High-ICI hypermethylated probes
cg06583813	-0.216527891125329	0.285500398039354	-5.08627411738139	5.06873590073291e-06	0.00985788384634316	3.23170062103854	0.436661378636282	0.220133487510953	-0.216527891125329	20	62710295	F	II	RGS19	5'UTR	shore	5'UTR-shore	chr20:62710769-62711745	NA	NA				High-ICI hypermethylated probes
cg10575089	0.112382201187969	0.463145671930809	5.08381814542775	5.1127119547858e-06	0.00987636073582836	3.22323799959219	0.384690172988264	0.497072374176233	0.112382201187969	17	56606542	R	II	SEPT4	Body	shelf	Body-shelf	chr17:56609025-56609583	NA	NA				Low-ICI hypermethylated probes
cg19368582	-0.226037821984914	0.571562157460661	-5.08244516124197	5.13745978936341e-06	0.00987757444929032	3.21850765772616	0.729362146393526	0.503324324408612	-0.226037821984914	10	88716646	R	II	MMRN2	Body	opensea	Body-opensea		NA	NA				High-ICI hypermethylated probes
cg08367573	-0.12000097463306	0.318445187762535	-5.07919797185328	5.19646025029657e-06	0.00994432514235025	3.20732181475203	0.402219453072407	0.282218478439347	-0.12000097463306	3	194538878	R	II		IGR	opensea	IGR-opensea		NA	TRUE				High-ICI hypermethylated probes
cg00786406	0.271769040676802	0.60082146552526	5.06986271411538	5.36982045632018e-06	0.00996314944809919	3.17517726425864	0.411095908826361	0.682864949503163	0.271769040676802	1	114474389	F	II	HIPK1	5'UTR	shore	5'UTR-shore	chr1:114471965-114472899	NA	NA				Low-ICI hypermethylated probes
cg20012247	0.195384979690259	0.724107343796046	5.06905247603663	5.38513279378874e-06	0.00996314944809919	3.1723882673608	0.587706508917941	0.7830914886082	0.195384979690259	22	20064541	F	II		IGR	shelf	IGR-shelf	chr22:20067406-20067900	NA	NA				Low-ICI hypermethylated probes
cg21604972	-0.288695913357572	0.500422180363647	-5.06900236399647	5.38608124982211e-06	0.00996314944809919	3.17221577689965	0.701964610443462	0.41326869708589	-0.288695913357572	3	115118067	F	II		IGR	opensea	IGR-opensea		NA	TRUE			rs75326618	High-ICI hypermethylated probes
cg12762731	0.14569255879209	0.80606024434087	5.06772637398872	5.41028702841973e-06	0.00996314944809919	3.16782388969421	0.70435034480677	0.85004290359886	0.14569255879209	3	129452041	F	II	TMCC1	Body	opensea	Body-opensea		NA	TRUE				Low-ICI hypermethylated probes
cg05040232	-0.236669129834335	0.526932820309976	-5.06650259290185	5.43360299820446e-06	0.00996314944809919	3.16361205202576	0.692154665666021	0.455485535831686	-0.236669129834335	3	194117403	F	II	GP5	Body	shore	Body-shore	chr3:194117601-194118988	NA	TRUE				High-ICI hypermethylated probes
cg01486818	-0.208861528087866	0.459448240572799	-5.06479249154605	5.46635032278851e-06	0.00996314944809919	3.15772703905699	0.605257231879422	0.396395703791556	-0.208861528087866	1	2409335	R	II	PLCH2	Body	shore	Body-shore	chr1:2409757-2410049	NA	NA				High-ICI hypermethylated probes
cg16795352	0.12526713868685	0.81680649553242	5.06392871722489	5.48296481636989e-06	0.00996314944809919	3.15475476599417	0.729355851543487	0.854622990230337	0.125267138686849	15	80368845	R	II	ZFAND6	5'UTR	opensea	5'UTR-opensea		NA	TRUE				Low-ICI hypermethylated probes
cg11841288	-0.206849003424249	0.363182534670757	-5.06188015902738	5.52256736988254e-06	0.00996314944809919	3.14770629958115	0.507586555929195	0.300737552504946	-0.206849003424249	1	53842221	R	II		IGR	opensea	IGR-opensea		NA	TRUE				High-ICI hypermethylated probes
cg06873895	0.138508487264529	0.716653818322153	5.05833345330355	5.59179884496078e-06	0.0100102743519699	3.1355054380766	0.619959214005407	0.758467701269936	0.138508487264529	1	110082688	F	I	GPR61	5'UTR	opensea	5'UTR-opensea		NA	NA				Low-ICI hypermethylated probes
cg18423852	-0.144277221827549	0.170590226331963	-5.05803945866945	5.59757579885306e-06	0.0100102743519699	3.1344942101041	0.271312060437988	0.127034838610439	-0.144277221827549	7	150653001	F	I	KCNH2	TSS200	island	TSS200-island	chr7:150652807-150653080	TRUE	TRUE		rs2907946		High-ICI hypermethylated probes
cg08570034	-0.321275375432902	0.55414867058427	-5.05640184001976	5.62986244977548e-06	0.0100141377509412	3.12886179815124	0.778435253433655	0.457159878000753	-0.321275375432902	5	175227702	F	II	CPLX2	5'UTR	shelf	5'UTR-shelf	chr5:175223609-175224679	NA	NA				High-ICI hypermethylated probes
cg23877497	0.320242068828938	0.500358450209976	5.05514055651741	5.65485432845402e-06	0.0100141377509412	3.12452417073871	0.276793232348265	0.597035301177202	0.320242068828937	6	158838943	F	II	TULP4	Body	opensea	Body-opensea		TRUE	TRUE		rs11967692		Low-ICI hypermethylated probes
cg18019572	-0.2603954821849	0.61785825824971	-5.05422344355925	5.67309513490808e-06	0.0100141377509412	3.12137039585931	0.799643783548603	0.539248301363703	-0.2603954821849	1	942489	F	II		IGR	opensea	IGR-opensea		NA	NA				High-ICI hypermethylated probes
cg05234552	-0.217269403560724	0.521017217234441	-5.05276870469072	5.70214785306796e-06	0.0100167594934495	3.11636822651448	0.672695857456079	0.455426453895355	-0.217269403560724	6	41438700	F	II		IGR	shore	IGR-shore	chr6:41438062-41438594	TRUE	NA				High-ICI hypermethylated probes
cg25554455	-0.329321340460698	0.54093797670845	-5.0498034652908	5.76182115209406e-06	0.0100167594934495	3.10617366116743	0.770841554011201	0.441520213550503	-0.329321340460698	10	133331065	R	II		IGR	opensea	IGR-opensea		NA	NA				High-ICI hypermethylated probes
cg20278154	-0.355866310240463	0.528339918482062	-5.0464959436335	5.82910800546683e-06	0.0100167594934495	3.09480471815247	0.776774889782007	0.420908579541545	-0.355866310240463	12	104914611	R	II	CHST11	Body	opensea	Body-opensea		NA	TRUE				High-ICI hypermethylated probes
cg25461389	-0.282549821299732	0.492012867323752	-5.04599651730485	5.83933511145267e-06	0.0100167594934495	3.09308826020219	0.689264629363188	0.406714808063455	-0.282549821299733	3	52080778	F	II		IGR	opensea	IGR-opensea		TRUE	TRUE		rs76288789		High-ICI hypermethylated probes
cg19542753	-0.180778840807591	0.279809050615627	-5.0421915482372	5.91783413969787e-06	0.0100167594934495	3.08001301559531	0.406013147028474	0.225234306220883	-0.180778840807591	5	180252309	F	II		IGR	opensea	IGR-opensea		NA	TRUE		rs77367689	rs75409148	High-ICI hypermethylated probes
cg10416784	-0.241877068843911	0.325332841868383	-5.04025407909452	5.95820355489253e-06	0.0100167594934495	3.07335646475763	0.494190418231113	0.252313349387202	-0.241877068843911	2	58797233	R	II		IGR	opensea	IGR-opensea		NA	TRUE				High-ICI hypermethylated probes
cg11683191	-0.280659646917773	0.480334093037972	-5.03799508486308	6.00561463522228e-06	0.0100167594934495	3.0655963542097	0.676266299376795	0.395606652459021	-0.280659646917773	19	39813728	R	II		IGR	shelf	IGR-shelf	chr19:39810992-39811293	NA	NA				High-ICI hypermethylated probes
cg07219494	0.299816659635181	0.543081589051744	5.03724403807918	6.02145946604212e-06	0.0100167594934495	3.06301661688188	0.33377561911775	0.633592278752931	0.299816659635181	5	166408484	R	II		IGR	shelf	IGR-shelf	chr5:166405484-166405917	NA	TRUE			rs72825454	Low-ICI hypermethylated probes
cg14467181	-0.242351089093426	0.517091038930795	-5.03713399342592	6.02378453064951e-06	0.0100167594934495	3.06263864041244	0.686279535090357	0.443928445996931	-0.242351089093426	17	47516312	F	I		IGR	opensea	IGR-opensea		NA	TRUE				High-ICI hypermethylated probes
cg09857577	-0.1543354748853	0.166728033034345	-5.03321010138617	6.10726991704799e-06	0.0100167594934495	3.04916287621304	0.274471666444837	0.120136191559537	-0.1543354748853	7	50136102	R	II	C7orf72	1stExon	shelf	1stExon-shelf	chr7:50132572-50132921	NA	NA				High-ICI hypermethylated probes
cg12613020	-0.210496043320759	0.609183110554115	-5.03283154364246	6.11538414559004e-06	0.0100167594934495	3.04786299102357	0.756133178532758	0.545637135211999	-0.210496043320759	5	134881662	R	II		IGR	shore	IGR-shore	chr5:134879443-134879819	NA	NA				High-ICI hypermethylated probes
cg20462561	-0.342498422085082	0.492501536620316	-5.03194879537797	6.13434672590466e-06	0.0100167594934495	3.04483195500229	0.731604208641977	0.389105786556895	-0.342498422085082	1	228890820	R	I		IGR	island	IGR-island	chr1:228890742-228890951	NA	NA				High-ICI hypermethylated probes
cg14600368	0.26459524605979	0.570802025095448	5.03171823711076	6.13930893973968e-06	0.0100167594934495	3.04404033188241	0.386084589166916	0.650679835226705	0.26459524605979	1	203578680	F	II		IGR	opensea	IGR-opensea		NA	TRUE				Low-ICI hypermethylated probes
cg09091373	-0.262925970883555	0.573610514424154	-5.02898938415003	6.19834185759795e-06	0.0100556663237103	3.03467174422247	0.757162607305126	0.494236636421571	-0.262925970883555	11	44959124	F	II	TP53I11	Body	opensea	Body-opensea		NA	TRUE				High-ICI hypermethylated probes
cg22644450	-0.29142693696588	0.515983825595679	-5.02723343909539	6.23662297308787e-06	0.0100556663237103	3.02864422658801	0.719432819326576	0.428005882360697	-0.29142693696588	2	114790476	F	II		IGR	opensea	IGR-opensea		NA	TRUE				High-ICI hypermethylated probes
cg14716207	0.177555331822898	0.685716970577607	5.02722450727119	6.23681828802666e-06	0.0100556663237103	3.02861356874702	0.561763248361622	0.739318580184519	0.177555331822898	2	98992607	R	II	CNGA3	Body	opensea	Body-opensea		NA	NA				Low-ICI hypermethylated probes
cg12082302	-0.235374692802279	0.461647390260911	-5.01952570462221	6.4074284297236e-06	0.0102902295494548	3.00219495296883	0.62596557202854	0.390590879226261	-0.235374692802279	1	6421246	F	II	ACOT7	Body	opensea	Body-opensea		NA	NA				High-ICI hypermethylated probes
cg17341366	-0.316379432397961	0.387737867427151	-5.01812321182435	6.43899925952551e-06	0.0102981774966247	2.99738376890629	0.608606527780445	0.292227095382484	-0.316379432397961	2	10148966	F	II		IGR	opensea	IGR-opensea		NA	NA				High-ICI hypermethylated probes
cg01320211	0.24566327529784	0.604436976795597	5.01707607721864	6.46267054260915e-06	0.0102981774966247	2.99379192646639	0.432936199700879	0.678599474998719	0.24566327529784	15	48019758	F	II	SEMA6D	5'UTR	opensea	5'UTR-opensea		NA	TRUE				Low-ICI hypermethylated probes
cg17851134	0.161429731274599	0.689692237754995	5.01275381754404	6.56128793968688e-06	0.0103745868910742	2.97896861135557	0.576996010261407	0.738425741536006	0.161429731274599	6	170622699	F	II	FAM120B	5'UTR	opensea	5'UTR-opensea		NA	TRUE				Low-ICI hypermethylated probes
cg23297413	0.157662990506933	0.675878925599876	5.00929413691718	6.64129010355768e-06	0.0104129751895854	2.96710672116928	0.565812309585602	0.723475300092535	0.157662990506933	5	10636139	R	II	ANKRD33B	Body	opensea	Body-opensea		NA	TRUE				Low-ICI hypermethylated probes
cg23601416	-0.187166406846174	0.412767733867984	-5.00604447643456	6.71730939373952e-06	0.0104129751895854	2.95596749322913	0.543431074496445	0.356264667650271	-0.187166406846174	22	19950040	F	I	COMT	5'UTR	opensea	5'UTR-opensea		NA	TRUE		rs11544670		High-ICI hypermethylated probes
cg23896514	-0.118022089935957	0.279621054765913	-5.00419055782054	6.76106090409988e-06	0.0104129751895854	2.94961373120075	0.362013834532525	0.243991744596568	-0.118022089935957	7	150103902	F	II	LOC728743	Body	shore	Body-shore	chr7:150104704-150105530	NA	NA				High-ICI hypermethylated probes
cg13393917	0.165326159179813	0.412118832057025	5.0036389214015	6.77413326567201e-06	0.0104129751895854	2.94772331708088	0.296702456780552	0.462028615960365	0.165326159179813	1	114521301	R	II	OLFML3	TSS1500	opensea	TSS1500-opensea		NA	NA				Low-ICI hypermethylated probes
cg13219080	-0.265058227973417	0.609621497496389	-4.99845950783938	6.89809099024275e-06	0.0104129751895854	2.92997741512565	0.79466214721368	0.529603919240263	-0.265058227973417	1	942161	R	II		IGR	opensea	IGR-opensea		TRUE	NA				High-ICI hypermethylated probes
cg26301565	-0.254151554931724	0.505350123479799	-4.99801666633942	6.90879237112571e-06	0.0104129751895854	2.92846043188839	0.682776680696286	0.428625125764561	-0.254151554931725	3	194117261	F	II	GP5	3'UTR	shore	3'UTR-shore	chr3:194117601-194118988	TRUE	TRUE		rs78877192		High-ICI hypermethylated probes
cg07803218	0.132701967278894	0.64916996416834	4.99576621940411	6.96342787455305e-06	0.0104129751895854	2.92075209931598	0.556528968143451	0.689230935422345	0.132701967278894	20	49346624	F	II	PARD6B	TSS1500	shore	TSS1500-shore	chr20:49347365-49348659	NA	NA				Low-ICI hypermethylated probes
cg26063874	-0.204399288158021	0.287729479562572	-4.99536737941314	6.97315499729166e-06	0.0104129751895854	2.91938610088854	0.430423322238926	0.226024034080905	-0.204399288158021	7	1260736	R	II		IGR	shelf	IGR-shelf	chr7:1263496-1264364	NA	NA			rs75402925	High-ICI hypermethylated probes
cg12847125	-0.343118677856811	0.469965986306415	-4.99355922412694	7.01742115666498e-06	0.0104129751895854	2.91319377602018	0.709501667074378	0.366382989217566	-0.343118677856811	8	142438036	R	I	PTP4A3	Body	shore	Body-shore	chr8:142439683-142440547	NA	TRUE				High-ICI hypermethylated probes
cg16998831	-0.305812495215092	0.461547849061353	-4.99307760673983	7.02925836102338e-06	0.0104129751895854	2.91154453020265	0.675039591003964	0.369227095788872	-0.305812495215091	7	187686	F	I		IGR	shore	IGR-shore	chr7:186352-186673	TRUE	NA				High-ICI hypermethylated probes
cg22734058	-0.212239292546225	0.405165482486815	-4.99039528805029	7.09554461952541e-06	0.0104129751895854	2.9023602419428	0.553332535773802	0.341093243227577	-0.212239292546225	2	238578491	R	II	LRRFIP1	Body	opensea	Body-opensea		TRUE	NA				High-ICI hypermethylated probes
cg12575202	-0.304441556348094	0.633514522950594	-4.98868312118999	7.13817726267175e-06	0.0104129751895854	2.89649866693574	0.846049194363414	0.541607638015321	-0.304441556348094	10	133331128	R	I		IGR	opensea	IGR-opensea		NA	NA				High-ICI hypermethylated probes
cg21453303	-0.135153676832068	0.207630610075596	-4.98842203255482	7.14470042158819e-06	0.0104129751895854	2.89560489618274	0.301983176920624	0.166829500088557	-0.135153676832068	1	6556848	R	II	PLEKHG5	Body	shore	Body-shore	chr1:6557561-6557872	NA	TRUE				High-ICI hypermethylated probes
cg08414647	0.203961140750154	0.583318632784581	4.98841173188984	7.14495789833486e-06	0.0104129751895854	2.8955696348035	0.440930666600512	0.644891807350665	0.203961140750154	3	119963930	F	II	GPR156	TSS1500	opensea	TSS1500-opensea		NA	NA				Low-ICI hypermethylated probes
cg17248487	-0.17856286735347	0.42127635686581	-4.98660767233081	7.1901934502984e-06	0.0104417417125067	2.88939434659524	0.545933452942762	0.367370585589291	-0.178562867353471	5	399887	R	II	AHRR	Body	opensea	Body-opensea		TRUE	TRUE				High-ICI hypermethylated probes
cg05890252	-0.11665439949549	0.68850238119808	-4.98482547309531	7.23515740020784e-06	0.0104419250660241	2.88329465514141	0.769940358204365	0.653285958708875	-0.11665439949549	14	105974580	F	II		IGR	opensea	IGR-opensea		NA	NA				High-ICI hypermethylated probes
cg12900649	-0.139206228803934	0.244962936913593	-4.98216365483373	7.30282907937124e-06	0.0104419250660241	2.87418583608494	0.342144643814452	0.202938415010519	-0.139206228803934	17	74494213	R	II	RHBDF2	5'UTR	shelf	5'UTR-shelf	chr17:74496992-74497632	TRUE	NA				High-ICI hypermethylated probes
cg05361530	-0.201055741995027	0.533693528887429	-4.98095995085763	7.33363499020529e-06	0.0104419250660241	2.87006728748409	0.674053197827354	0.472997455832327	-0.201055741995027	16	853349	R	II		IGR	shelf	IGR-shelf	chr16:857341-858025	NA	NA				High-ICI hypermethylated probes
cg01641286	-0.212815578670106	0.521741595356059	-4.97792268926101	7.41193559564005e-06	0.0104419250660241	2.85967666244369	0.670310961597453	0.457495382927347	-0.212815578670106	2	10483916	R	II	HPCAL1	5'UTR	opensea	5'UTR-opensea		NA	TRUE				High-ICI hypermethylated probes
cg02061967	-0.155263887050402	0.697688009793601	-4.97652548437158	7.44823106452625e-06	0.0104419250660241	2.85489750336623	0.806079779998599	0.650815892948197	-0.155263887050402	2	10284324	R	II	C2orf48	Body	opensea	Body-opensea		NA	TRUE			rs729917	High-ICI hypermethylated probes
cg23198334	0.178212436845321	0.725690899074796	4.97634521591303	7.45292664539195e-06	0.0104419250660241	2.85428092697835	0.601278443163911	0.779490880009233	0.178212436845321	10	76179907	R	II	ADK	Body	opensea	Body-opensea		NA	TRUE				Low-ICI hypermethylated probes
cg10256477	-0.176225500465576	0.439369271137285	-4.96864550611921	7.65622701110249e-06	0.0106285560099958	2.82795279004347	0.562394620518914	0.386169120053338	-0.176225500465576	12	49934029	F	II	KCNH3	Body	shore	Body-shore	chr12:49931623-49933637	NA	NA				High-ICI hypermethylated probes
cg19214629	0.131384562332511	0.689744864344362	4.96687666672943	7.70369554595573e-06	0.0106583230478144	2.82190651373482	0.598023566112232	0.729408128444743	0.131384562332511	20	6019340	F	II	CRLS1	3'UTR	shelf	3'UTR-shelf	chr20:6021583-6022874	NA	NA				Low-ICI hypermethylated probes
cg26716103	-0.115129832927933	0.170536815081831	-4.96553583871223	7.73987067722762e-06	0.0106723174375836	2.81732378093292	0.25091047203152	0.135780639103587	-0.115129832927933	10	81020830	F	II	ZMIZ1	Body	opensea	Body-opensea		TRUE	TRUE				High-ICI hypermethylated probes
cg26692003	-0.333728756559252	0.620457551632036	-4.96200761713143	7.83586090716874e-06	0.0107120538356773	2.80526698704148	0.853438004324344	0.519709247765091	-0.333728756559252	3	13063165	R	I	IQSEC1	Body	opensea	Body-opensea		NA	TRUE				High-ICI hypermethylated probes
cg23204276	-0.20059675901955	0.536191448369508	-4.95817565206198	7.94144100898487e-06	0.0107120538356773	2.79217567416571	0.676230695232213	0.475633936212662	-0.20059675901955	22	29729285	R	II	AP1B1	Body	opensea	Body-opensea		NA	NA				High-ICI hypermethylated probes
cg07137416	0.269403200099004	0.534193937747648	4.95764397870352	7.95619997517229e-06	0.0107120538356773	2.790359578784	0.346120005603061	0.615523205702065	0.269403200099004	8	12871962	R	II	C8orf79	Body	opensea	Body-opensea		NA	NA				Low-ICI hypermethylated probes
cg22169427	-0.243908050473904	0.566239457643077	-4.95689117126521	7.97714363647643e-06	0.0107120538356773	2.78778824980361	0.736514889105991	0.492606838632088	-0.243908050473903	7	76143178	R	II	UPK3B	Body	shelf	Body-shelf	chr7:76145396-76145781	NA	NA	low-CpG:75981113-75981338			High-ICI hypermethylated probes
cg24706674	-0.261446183852532	0.572309854282521	-4.95637470134821	7.99154355052109e-06	0.0107120538356773	2.78602424814374	0.75482888829278	0.493382704440247	-0.261446183852533	10	134679704	F	II		IGR	shelf	IGR-shelf	chr10:134682700-134682917	NA	NA				High-ICI hypermethylated probes
cg09752496	-0.195223622953695	0.319043581220865	-4.95419213018288	8.05267943123445e-06	0.0107120538356773	2.77857040463617	0.455331770830048	0.260108147876353	-0.195223622953695	4	41798561	R	II		IGR	opensea	IGR-opensea		NA	TRUE				High-ICI hypermethylated probes
cg25903497	0.19329131339995	0.800576749170605	4.95359247256041	8.06955676950887e-06	0.0107120538356773	2.77652267893192	0.665637530381961	0.858928843781911	0.19329131339995	2	219157103	F	I	PNKD	Body	island	Body-island	chr2:219156977-219157380	NA	NA				Low-ICI hypermethylated probes
cg26455175	-0.193723250347424	0.3247776944069	-4.9525616973469	8.09864919084028e-06	0.0107120538356773	2.77300296866705	0.460018454083403	0.26629520373598	-0.193723250347424	16	853533	R	II		IGR	shelf	IGR-shelf	chr16:857341-858025	NA	NA				High-ICI hypermethylated probes
cg04042861	0.273038614767125	0.467933962970549	4.95241346155304	8.10284144339684e-06	0.0107120538356773	2.77249682057764	0.277322099831235	0.55036071459836	0.273038614767125	2	231989824	R	II	HTR2B	TSS200	opensea	TSS200-opensea		NA	NA				Low-ICI hypermethylated probes
cg01325465	-0.18332114728023	0.447174631413859	-4.95226421518946	8.10706443102078e-06	0.0107120538356773	2.77198722737661	0.575153545552887	0.391832398272657	-0.18332114728023	16	85123554	R	II	KIAA0513	3'UTR	opensea	3'UTR-opensea		NA	NA				High-ICI hypermethylated probes
cg03180426	-0.161168727058499	0.297454111184372	-4.9522052926683	8.10873226378781e-06	0.0107120538356773	2.77178604129483	0.409968128187475	0.248799401128976	-0.161168727058499	9	139964156	R	II	C9orf140	Body	island	Body-island	chr9:139964155-139965284	NA	NA				High-ICI hypermethylated probes
cg13611989	-0.142509901877587	0.272790375231254	-4.94536897599373	8.30454502655819e-06	0.0107280029982762	2.7484498064601	0.372278419938248	0.229768518060661	-0.142509901877587	9	133710064	R	II	ABL1	TSS1500	shore	TSS1500-shore	chr9:133710260-133711285	NA	NA				High-ICI hypermethylated probes
cg00952054	-0.353541005009325	0.419087855912522	-4.94531189025202	8.30619954635388e-06	0.0107280029982762	2.74825498889518	0.665899500919032	0.312358495909706	-0.353541005009325	1	9437047	R	I		IGR	opensea	IGR-opensea		TRUE	TRUE				High-ICI hypermethylated probes
cg04988370	0.172855355831252	0.711628793585628	4.94451868432955	8.32922264283123e-06	0.0107280029982762	2.74554808369106	0.590956186684565	0.763811542515817	0.172855355831252	4	108855653	R	II	CYP2U1	Body	shelf	Body-shelf	chr4:108852495-108853387	NA	NA				Low-ICI hypermethylated probes
cg27442613	-0.173523597588374	0.658190274043741	-4.94262801316953	8.38435332180223e-06	0.0107280029982762	2.73909658088674	0.779329389341285	0.605805791752911	-0.173523597588374	1	2801085	F	II		IGR	opensea	IGR-opensea		NA	NA				High-ICI hypermethylated probes
cg04121631	-0.115349401520493	0.162682999010731	-4.94260575611703	8.38500445354857e-06	0.0107280029982762	2.7390206388155	0.243209939694849	0.127860538174356	-0.115349401520493	1	875345	F	II	SAMD11	Body	shore	Body-shore	chr1:875730-878363	NA	TRUE				High-ICI hypermethylated probes
cg18491039	-0.206950681994647	0.533437446742804	-4.94233700322594	8.39287076424808e-06	0.0107280029982762	2.73810365145255	0.677912451154162	0.470961769159515	-0.206950681994647	5	177660509	R	II	AGXT2L2	TSS1500	shore	TSS1500-shore	chr5:177659197-177659927	NA	NA				High-ICI hypermethylated probes
cg27261921	-0.111405121826129	0.250386464674876	-4.94019241244363	8.45590267417739e-06	0.0107280029982762	2.73078692829586	0.328159851610098	0.216754729783969	-0.111405121826129	6	33361102	F	II	KIFC1	Body	shore	Body-shore	chr6:33359097-33359975	NA	NA				High-ICI hypermethylated probes
cg11961138	-0.193963617097132	0.20404454520857	-4.93916134213263	8.48637237192241e-06	0.0107280029982762	2.72726962027908	0.339453108087699	0.145489490990568	-0.193963617097131	17	38599366	R	I	IGFBP4	TSS1500	island	TSS1500-island	chr17:38599270-38599524	TRUE	NA				High-ICI hypermethylated probes
cg24401262	-0.28779444427756	0.402223667270828	-4.93912151818444	8.48755139219853e-06	0.0107280029982762	2.72713377343987	0.60313676987969	0.31534232560213	-0.28779444427756	1	31956405	F	II		IGR	opensea	IGR-opensea		TRUE	TRUE				High-ICI hypermethylated probes
cg00772091	-0.171512154307279	0.286938744610988	-4.93758120267865	8.53327742772042e-06	0.0107481333803534	2.72187977469099	0.406673644787768	0.235161490480489	-0.171512154307279	10	124914911	F	II	BUB3	Body	shore	Body-shore	chr10:124913631-124914726	NA	NA				High-ICI hypermethylated probes
cg06865451	-0.187630059536822	0.358525741021675	-4.93584192636415	8.58520093366041e-06	0.0107481333803534	2.71594783066106	0.489512763717193	0.301882704180371	-0.187630059536822	1	39035934	R	II		IGR	opensea	IGR-opensea		NA	NA				High-ICI hypermethylated probes
cg09064314	-0.441216213818902	0.593193801908469	-4.93516126696516	8.60560543682747e-06	0.0107481333803534	2.71362659069922	0.9012126681594	0.459996454340499	-0.441216213818902	10	131742209	R	I	EBF3	Body	opensea	Body-opensea		NA	NA				High-ICI hypermethylated probes
cg07336438	-0.171003656623154	0.365091538833736	-4.93506620599134	8.60845892264697e-06	0.0107481333803534	2.71330241520829	0.484471450061221	0.313467793438066	-0.171003656623154	16	1131466	R	II		IGR	shore	IGR-shore	chr16:1128223-1130394	NA	NA				High-ICI hypermethylated probes
cg01598421	-0.362372840440492	0.546958161689326	-4.93261398549574	8.6823905175278e-06	0.0107747413911548	2.70494066671894	0.799935427657216	0.437562587216725	-0.362372840440492	8	134132043	R	I	TG	Body	opensea	Body-opensea		NA	TRUE				High-ICI hypermethylated probes
cg11503297	-0.266535036762016	0.448982053766409	-4.93055221965314	8.74503296091297e-06	0.0107871035191291	2.6979114753527	0.635053683204043	0.368518646442027	-0.266535036762015	5	1745840	R	II		IGR	island	IGR-island	chr5:1745534-1745851	NA	NA				High-ICI hypermethylated probes
cg06272089	-0.264304769450064	0.684793320419748	-4.92956630940356	8.77514455253696e-06	0.0107873471397376	2.69455057965706	0.869307970790547	0.605003201340483	-0.264304769450064	15	74165916	R	II	TBC1D21	TSS200	opensea	TSS200-opensea		NA	NA				High-ICI hypermethylated probes
cg26849776	-0.244512227512128	0.514308951555188	-4.9285115922873	8.80747044815997e-06	0.0107873471397376	2.69095539479198	0.685006166988183	0.440493939476054	-0.244512227512128	8	142437958	R	II	PTP4A3	Body	shore	Body-shore	chr8:142439683-142440547	NA	TRUE				High-ICI hypermethylated probes
cg18584368	-0.207250322566305	0.415548717349897	-4.92527170741067	8.90750289262773e-06	0.0108244926694548	2.67991342640645	0.560232904801846	0.35298258223554	-0.207250322566305	5	314553	R	II	AHRR	Body	opensea	Body-opensea		NA	NA				High-ICI hypermethylated probes
cg02746340	-0.343389220526003	0.43184341023744	-4.92246798638584	8.99496915519636e-06	0.0108493669919186	2.67036008217141	0.67156796041597	0.328178739889967	-0.343389220526003	6	170239172	R	II		IGR	island	IGR-island	chr6:170239046-170239297	NA	NA				High-ICI hypermethylated probes
cg16360668	-0.15322432077261	0.391135106647174	-4.9219154810876	9.0123046584968e-06	0.0108493669919186	2.66847771855915	0.498103028695977	0.344878707923367	-0.15322432077261	1	19265059	R	II	IFFO2	Body	opensea	Body-opensea		NA	TRUE				High-ICI hypermethylated probes
cg00468395	0.245389421776948	0.48773542825342	4.92061968432883	9.05309069569631e-06	0.0108493669919186	2.66406329057795	0.31642583191857	0.561815253695518	0.245389421776948	16	28193063	F	II	XPO6	Body	opensea	Body-opensea		TRUE	TRUE				Low-ICI hypermethylated probes
cg01540595	0.231493922474156	0.652109592858936	4.91929783687697	9.09488356563323e-06	0.0108493669919186	2.65956054882894	0.490500628112827	0.721994550586983	0.231493922474156	1	75590960	F	II		IGR	island	IGR-island	chr1:75590817-75591354	NA	NA				Low-ICI hypermethylated probes
cg16451995	-0.252578347279923	0.578944677591796	-4.91793476748633	9.13817828086614e-06	0.0108493669919186	2.65491784793057	0.755272957768347	0.502694610488423	-0.252578347279924	16	8942340	R	II	PMM2	3'UTR	opensea	3'UTR-opensea		NA	NA				High-ICI hypermethylated probes
cg24228532	-0.150850075005238	0.162900552237694	-4.91461889000124	9.24434668176655e-06	0.0108493669919186	2.64362570811955	0.268210981958332	0.117360906953093	-0.150850075005238	18	76002290	R	I		IGR	shelf	IGR-shelf	chr18:75998674-75999123	NA	NA				High-ICI hypermethylated probes
cg05873766	-0.151160074331545	0.408948868635674	-4.91274803011305	9.30478205910495e-06	0.0108493669919186	2.63725576137732	0.514475712980338	0.363315638648793	-0.151160074331545	5	141615654	R	I		IGR	opensea	IGR-opensea		NA	TRUE				High-ICI hypermethylated probes
cg16352527	-0.391613505975493	0.58066668555109	-4.91181557028334	9.33504859015593e-06	0.0108493669919186	2.6340812300291	0.854057246326434	0.462443740350941	-0.391613505975493	10	72476178	R	I	ADAMTS14	Body	opensea	Body-opensea		TRUE	TRUE				High-ICI hypermethylated probes
cg02355868	-0.197059351973916	0.633441383382852	-4.91052521486718	9.3770915808882e-06	0.0108493669919186	2.62968861560089	0.771011119666529	0.573951767692613	-0.197059351973916	16	89034797	F	I	CBFA2T3	Body	shore	Body-shore	chr16:89033529-89033786	NA	NA				High-ICI hypermethylated probes
cg02250764	-0.18909443871763	0.661823077769579	-4.91049257770266	9.37815738958357e-06	0.0108493669919186	2.62957751795315	0.793832402912075	0.604737964194446	-0.189094438717629	5	134878149	R	II		IGR	shore	IGR-shore	chr5:134879443-134879819	NA	NA				High-ICI hypermethylated probes
cg23598718	-0.190418995716526	0.479553516788275	-4.91048684798253	9.37834451326453e-06	0.0108493669919186	2.62955801388369	0.612487532665849	0.422068536949323	-0.190418995716526	17	43037808	F	II	C1QL1	Body	shore	Body-shore	chr17:43037166-43037740	NA	TRUE		rs3024299		High-ICI hypermethylated probes
cg18845433	-0.281958436739126	0.599438744977441	-4.90856464099175	9.44132826850477e-06	0.010864108651571	2.6230152548198	0.796277653644378	0.514319216905252	-0.281958436739126	12	53193325	R	II		IGR	opensea	IGR-opensea		TRUE	TRUE				High-ICI hypermethylated probes
cg04470557	-0.219098432745993	0.385420549413963	-4.90753020524402	9.47539478323764e-06	0.0108695252773114	2.61949465514419	0.538376059066826	0.319277626320833	-0.219098432745994	5	131630995	R	II	SLC22A4	Body	shore	Body-shore	chr5:131629230-131630797	NA	NA				High-ICI hypermethylated probes
cg21881338	-0.170295497391017	0.322155758751278	-4.90522539955579	9.55173258113104e-06	0.0108960524708086	2.61165145026851	0.441041294665762	0.270745797274745	-0.170295497391017	12	125566189	F	II	AACS	Body	shelf	Body-shelf	chr12:125569828-125570140	NA	NA				High-ICI hypermethylated probes
cg02494703	-0.194598214110513	0.323348547310278	-4.90421534480487	9.5853768558044e-06	0.0109040584506949	2.60821467910799	0.459200130745919	0.264601916635406	-0.194598214110513	11	64659387	R	II	MIR194-2	TSS1500	shelf	TSS1500-shelf	chr11:64662462-64662880	NA	NA		rs11604872		High-ICI hypermethylated probes
cg08722103	-0.176715022550041	0.651075742151196	-4.90305300652017	9.62423768474723e-06	0.0109179378451075	2.60426007405316	0.774442833365376	0.597727810815335	-0.176715022550041	12	133197668	F	II	P2RX2	Body	shore	Body-shore	chr12:133195922-133196556	NA	NA				High-ICI hypermethylated probes
cg05921324	-0.235492789922727	0.586375905018958	-4.90161777272789	9.67243591265115e-06	0.0109423038385756	2.59937747355586	0.750776531946146	0.515283742023418	-0.235492789922727	11	116694114	F	II	APOA4	TSS200	shore	TSS200-shore	chr11:116691949-116692360	NA	NA				High-ICI hypermethylated probes
cg01383486	-0.272981088236452	0.391899258923859	-4.900332036379	9.7158150025983e-06	0.0109610987734272	2.59500390044461	0.582470962032325	0.309489873795873	-0.272981088236452	16	85721561	R	II	GINS2	Body	shore	Body-shore	chr16:85722209-85722941	NA	NA				High-ICI hypermethylated probes
cg24258886	-0.101672340733038	0.155077389202765	-4.89814876392131	9.78991400375179e-06	0.0109753256962037	2.58757822172184	0.226056193110735	0.124383852377697	-0.101672340733038	11	119239105	F	II	USP2	Body	shelf	Body-shelf	chr11:119234480-119235214	TRUE	TRUE				High-ICI hypermethylated probes
cg02861615	-0.169242118227822	0.187421175968295	-4.89759414128834	9.80882582500389e-06	0.0109753256962037	2.5856920493862	0.305571333976397	0.136329215748575	-0.169242118227822	1	39036030	F	II		IGR	opensea	IGR-opensea		NA	NA				High-ICI hypermethylated probes
cg23081213	-0.316976404358105	0.446481860659167	-4.89506492667653	9.89552431040525e-06	0.0110121589368017	2.57709163545513	0.667767275022372	0.350790870664268	-0.316976404358105	2	219696472	F	II	PRKAG3	1stExon	opensea	1stExon-opensea		NA	NA		rs60578863		High-ICI hypermethylated probes
cg08162476	-0.30011488938262	0.432512413486302	-4.89073638007113	1.00456514824732e-05	0.0110590200779874	2.56237650404443	0.642026581545867	0.341911692163247	-0.30011488938262	3	13064001	R	I	IQSEC1	Body	opensea	Body-opensea		TRUE	TRUE	low-CpG:13038890-13039156			High-ICI hypermethylated probes
cg20398120	-0.20149155190206	0.405541649485291	-4.88671979192411	1.01869588244912e-05	0.0110751671733902	2.548726173342	0.546205563077295	0.344714011175235	-0.20149155190206	2	219696690	F	II	PRKAG3	TSS200	opensea	TSS200-opensea		NA	NA				High-ICI hypermethylated probes
cg11214757	0.107317723290486	0.853414543048952	4.88584655622651	1.02179374605247e-05	0.0110751671733902	2.54575903777532	0.778494623015971	0.885812346306457	0.107317723290486	5	176024225	R	I	GPRIN1	Body	island	Body-island	chr5:176023777-176024651	TRUE	NA				Low-ICI hypermethylated probes
cg00509136	-0.182291221048569	0.48789845363015	-4.88519685101712	1.02410462101808e-05	0.0110751671733902	2.5435515550096	0.615158362664056	0.432867141615487	-0.182291221048569	19	50141490	F	II	RRAS	Body	shore	Body-shore	chr19:50143223-50143975	TRUE	NA				High-ICI hypermethylated probes
cg03396896	-0.224943600620103	0.47876295767544	-4.88443717979886	1.02681313378958e-05	0.0110751671733902	2.54097058144083	0.63579905622155	0.410855455601446	-0.224943600620103	3	194117107	R	II	GP5	3'UTR	shore	3'UTR-shore	chr3:194117601-194118988	TRUE	TRUE				High-ICI hypermethylated probes
cg06727703	-0.156879328984409	0.416105967104888	-4.88442892256814	1.02684261253035e-05	0.0110751671733902	2.5409425284145	0.525625498660042	0.368746169675633	-0.156879328984409	17	79305710	R	II	TMEM105	TSS1500	opensea	TSS1500-opensea		NA	NA				High-ICI hypermethylated probes
cg23158103	0.166000323523784	0.589564737334943	4.882977890109	1.03203580090598e-05	0.0110751671733902	2.53601307800096	0.473677719025887	0.639678042549671	0.166000323523784	7	148848205	F	II	ZNF398	5'UTR	shelf	5'UTR-shelf	chr7:148844254-148845556	NA	NA				Low-ICI hypermethylated probes
cg27240158	-0.18576842805117	0.308331854765932	-4.88193695334844	1.03577715351945e-05	0.0110751671733902	2.53247713838334	0.43801924793373	0.25225081988256	-0.18576842805117	11	12698019	R	II	TEAD1	5'UTR	shore	5'UTR-shore	chr11:12695414-12696981	NA	NA				High-ICI hypermethylated probes
cg08325885	-0.262574183717516	0.536435093230298	-4.87988598664389	1.04318779250799e-05	0.0110751671733902	2.52551106043811	0.719741598844414	0.457167415126897	-0.262574183717516	8	22297108	F	II	PPP3CC	TSS1500	shore	TSS1500-shore	chr8:22298112-22299142	NA	NA				High-ICI hypermethylated probes
cg17397069	0.181683896831903	0.421471706176023	4.87928233002753	1.04537885086507e-05	0.0110751671733902	2.52346095568151	0.294635778199034	0.476319675030938	0.181683896831903	5	156110742	R	II	SGCD	Body	opensea	Body-opensea		NA	TRUE				Low-ICI hypermethylated probes
cg25579867	0.21675425271702	0.787064912494235	4.87687033915378	1.05417871270654e-05	0.0110751671733902	2.51527042338924	0.635745905880466	0.852500158597487	0.21675425271702	5	10647125	R	I	ANKRD33B	Body	shelf	Body-shelf	chr5:10649367-10650352	NA	NA				Low-ICI hypermethylated probes
cg06443678	-0.37003287498199	0.599876906445582	-4.87550263463229	1.05920089732827e-05	0.0110751671733902	2.51062669839819	0.85820174369716	0.48816886871517	-0.37003287498199	17	55785087	R	I		IGR	opensea	IGR-opensea		NA	TRUE				High-ICI hypermethylated probes
cg24531714	0.126406355348451	0.780555085239886	4.87517166998971	1.06041971944339e-05	0.0110751671733902	2.50950305681333	0.692309139053232	0.818715494401682	0.126406355348451	8	67475459	R	II	MYBL1	3'UTR	opensea	3'UTR-opensea		NA	NA				Low-ICI hypermethylated probes
cg06710259	0.222410300452058	0.514179328623274	4.87435101492744	1.06344783739036e-05	0.0110751671733902	2.50671701353123	0.358911760383158	0.581322060835216	0.222410300452058	5	55775841	R	II		IGR	shore	IGR-shore	chr5:55776604-55777233	NA	NA				Low-ICI hypermethylated probes
cg21929761	-0.21038173503681	0.480504711100242	-4.87233113108052	1.07093718119546e-05	0.0110751671733902	2.4998604467498	0.627374978956128	0.416993243919318	-0.21038173503681	1	32250675	F	II		IGR	shelf	IGR-shelf	chr1:32254004-32254353	NA	NA				High-ICI hypermethylated probes
cg06180869	-0.157096938802252	0.607878451983824	-4.86706897759973	1.0906923117608e-05	0.0110772338166718	2.48200283440285	0.717549899826905	0.560452961024653	-0.157096938802252	11	76446769	F	II		IGR	opensea	IGR-opensea		NA	TRUE		rs4945112		High-ICI hypermethylated probes
cg19694770	-0.217538578827314	0.591347456544783	-4.86476443011966	1.09945628164724e-05	0.0110772338166718	2.47418439419093	0.743214011575172	0.525675432747858	-0.217538578827314	1	2407304	F	I	PLCH2	TSS1500	shelf	TSS1500-shelf	chr1:2409757-2410049	NA	NA				High-ICI hypermethylated probes
cg10295858	-0.139716620343229	0.159558593113043	-4.86160702628994	1.11157593145736e-05	0.0110772338166718	2.46347477971563	0.257096611088505	0.117379990745275	-0.13971662034323	16	411352	R	I		IGR	island	IGR-island	chr16:409984-411491	NA	NA				High-ICI hypermethylated probes
cg06659980	-0.144216919494534	0.590894265990102	-4.86021140572965	1.11697471405024e-05	0.0110772338166718	2.45874179290325	0.691574002241004	0.547357082746469	-0.144216919494534	1	3130535	R	II	PRDM16	Body	opensea	Body-opensea		NA	NA				High-ICI hypermethylated probes
cg08124461	-0.119584998769669	0.336799558712545	-4.85978752487558	1.11861953474934e-05	0.0110772338166718	2.45730438038644	0.420283425778163	0.300698427008494	-0.119584998769669	15	57818971	R	II	CGNL1	Body	opensea	Body-opensea		NA	TRUE				High-ICI hypermethylated probes
cg02068232	-0.204115099565185	0.373571267422805	-4.85884589840381	1.12228192096098e-05	0.0110772338166718	2.45411142010173	0.516066714289067	0.311951614723882	-0.204115099565185	10	98201097	F	II	TLL2	Body	opensea	Body-opensea		NA	TRUE				High-ICI hypermethylated probes
cg17100528	-0.126792672428688	0.301939505445638	-4.85753291542169	1.12740832941917e-05	0.0110772338166718	2.44965961292509	0.390455144688308	0.263662472259619	-0.126792672428688	15	72099912	F	II		IGR	opensea	IGR-opensea		NA	TRUE				High-ICI hypermethylated probes
cg02066936	-0.33510882071629	0.529527166933932	-4.85674426868474	1.13049856444828e-05	0.0110772338166718	2.44698583904128	0.763471060641531	0.428362239925241	-0.33510882071629	1	54808648	R	II	SSBP3	Body	opensea	Body-opensea		NA	TRUE				High-ICI hypermethylated probes
cg16750801	-0.136317615422833	0.142872873537685	-4.85605445191434	1.13320836073574e-05	0.0110772338166718	2.44464726448887	0.238038001285701	0.101720385862868	-0.136317615422833	10	129706313	F	I	PTPRE	5'UTR	shore	5'UTR-shore	chr10:129705217-129706237	TRUE	NA				High-ICI hypermethylated probes
cg27109748	-0.314405527195162	0.581518437990472	-4.855906092688	1.13379199059873e-05	0.0110772338166718	2.44414432234874	0.801009089051245	0.486603561856083	-0.314405527195162	7	2150016	F	I	MAD1L1	Body	opensea	Body-opensea		NA	TRUE				High-ICI hypermethylated probes
cg09690040	0.222814438180965	0.461126682731567	4.8538093754164	1.14207188291556e-05	0.0110772338166718	2.43703700349157	0.305576980605233	0.528391418786198	0.222814438180965	3	126569599	R	II	CHCHD6	Body	opensea	Body-opensea		TRUE	TRUE				Low-ICI hypermethylated probes
cg17156402	-0.193265093655008	0.632286234687232	-4.85366794958433	1.14263250262132e-05	0.0110772338166718	2.43655764853126	0.767207149125634	0.573942055470625	-0.193265093655008	1	16390468	F	I	FAM131C	Body	opensea	Body-opensea		NA	TRUE				High-ICI hypermethylated probes
cg08875297	-0.280121972165468	0.621422308047328	-4.85167975691161	1.15054246057263e-05	0.0110772338166718	2.42981933382366	0.816979156540203	0.536857184374734	-0.280121972165469	12	56127068	F	II		IGR	shelf	IGR-shelf	chr12:56122017-56123186	NA	NA			rs2462936	High-ICI hypermethylated probes
cg20424973	-0.189040427711975	0.314770943343972	-4.85138951099196	1.15170168161435e-05	0.0110772338166718	2.42883572873003	0.446742562690067	0.257702134978092	-0.189040427711975	2	3045241	R	II		IGR	opensea	IGR-opensea		NA	NA				High-ICI hypermethylated probes
cg12912663	-0.274006653178499	0.743284207511992	-4.85028885569116	1.15610804574936e-05	0.0110772338166718	2.42510595356106	0.934571871051698	0.6605652178732	-0.274006653178499	11	66102239	R	I	RIN1	Body	island	Body-island	chr11:66102024-66102279	NA	NA				High-ICI hypermethylated probes
cg07426848	-0.117386943796599	0.721305961926701	-4.84972710302891	1.15836334112531e-05	0.0110772338166718	2.42320247243169	0.803255337784704	0.685868393988105	-0.117386943796599	1	153521712	R	II	S100A3	5'UTR	opensea	5'UTR-opensea		TRUE	NA				High-ICI hypermethylated probes
cg01771462	0.235027921671094	0.600198577952778	4.84877191743937	1.16220808969216e-05	0.0110772338166718	2.41996604602414	0.436122481691826	0.67115040336292	0.235027921671093	15	33245281	R	II	FMN1	Body	opensea	Body-opensea		NA	TRUE				Low-ICI hypermethylated probes
cg15360478	-0.321234106534859	0.636559794180958	-4.84708001785321	1.16904897824301e-05	0.0110772338166718	2.41423402077957	0.860817566667558	0.539583460132699	-0.321234106534859	2	43094440	F	II		IGR	opensea	IGR-opensea		NA	TRUE				High-ICI hypermethylated probes
cg01357713	-0.316849867820168	0.504582313682058	-4.84663663440008	1.17084824527751e-05	0.0110772338166718	2.41273199599523	0.725779391216892	0.408929523396724	-0.316849867820168	2	219696528	F	I	PRKAG3	TSS200	opensea	TSS200-opensea		NA	NA		rs6710262		High-ICI hypermethylated probes
cg26158980	-0.112716428734489	0.356118235879558	-4.84575097309639	1.17445043445449e-05	0.0110772338166718	2.4097318462511	0.434807063486654	0.322090634752165	-0.11271642873449	11	3692187	R	II	CHRNA10	Body	shelf	Body-shelf	chr11:3688375-3689007	NA	NA				High-ICI hypermethylated probes
cg27305903	-0.198989606409408	0.292685336574119	-4.84557555770153	1.17516517897275e-05	0.0110772338166718	2.40913765655956	0.43160260897314	0.232613002563732	-0.198989606409408	16	85320585	R	II		IGR	island	IGR-island	chr16:85320574-85320775	TRUE	TRUE			rs4783156	High-ICI hypermethylated probes
cg21213952	-0.22176869044303	0.5547712772299	-4.84504037985251	1.17734844481749e-05	0.0110772338166718	2.40732488292421	0.709590929048619	0.487822238605589	-0.22176869044303	2	100824702	F	II		IGR	opensea	IGR-opensea		NA	NA				High-ICI hypermethylated probes
cg06191068	-0.126519845468737	0.280433457409922	-4.84217824442311	1.18909232400048e-05	0.0111179046364982	2.39763143246381	0.368758632548474	0.242238787079737	-0.126519845468737	17	76989451	R	II	CANT1	3'UTR	shore	3'UTR-shore	chr17:76989642-76990039	TRUE	TRUE				High-ICI hypermethylated probes
cg02879967	0.160829580597526	0.618308111863923	4.84068283960826	1.19527390469147e-05	0.011119860311926	2.39256766796415	0.506030857484518	0.666860438082044	0.160829580597526	11	14477198	R	II		IGR	opensea	IGR-opensea		NA	TRUE				Low-ICI hypermethylated probes
cg19583076	-0.13185503629621	0.4637800530528	-4.83755275986896	1.20831505024124e-05	0.0111375528544989	2.38197044708824	0.555829795372795	0.423974759076585	-0.13185503629621	19	42381099	R	II	CD79A	TSS200	opensea	TSS200-opensea		NA	NA				High-ICI hypermethylated probes
cg04695027	-0.183856330150829	0.483672826441787	-4.83383015187273	1.224006792397e-05	0.0111837114337281	2.36937052366331	0.612025358811234	0.428169028660405	-0.183856330150829	11	65793986	R	II	CATSPER1	1stExon	shelf	1stExon-shelf	chr11:65789909-65790168	NA	NA				High-ICI hypermethylated probes
cg06976521	-0.257595204830963	0.539640224096854	-4.83223802072111	1.23077893211886e-05	0.0111837114337281	2.36398275039156	0.719470838790168	0.461875633959205	-0.257595204830963	22	29729206	R	II	SNORD125	Body	opensea	Body-opensea		NA	NA				High-ICI hypermethylated probes
cg00400964	-0.221589209699957	0.549502145591137	-4.82999285571057	1.24039128284853e-05	0.0111837114337281	2.35638625019629	0.704196499532617	0.48260728983266	-0.221589209699957	22	42325444	R	II		IGR	shelf	IGR-shelf	chr22:42322043-42322909	NA	NA				High-ICI hypermethylated probes
cg06603309	-0.254344484517766	0.721851412467395	-4.82991098339984	1.24074319609997e-05	0.0111837114337281	2.35610926103772	0.899412656376024	0.645068171858258	-0.254344484517766	11	2724144	F	I	KCNQ1	Body	shelf	Body-shelf	chr11:2720410-2722087	NA	TRUE				High-ICI hypermethylated probes
cg08729059	-0.253170342869314	0.470651502071851	-4.82824764897352	1.24791399016848e-05	0.0111837114337281	2.35048227806632	0.647393062188165	0.394222719318851	-0.253170342869314	1	26495874	R	II	ZNF593	TSS1500	shore	TSS1500-shore	chr1:26496179-26496824	NA	NA				High-ICI hypermethylated probes
cg09579361	-0.17198790879492	0.824253370103142	-4.82700221398364	1.25330979113303e-05	0.0111837114337281	2.34626950995563	0.944320400771294	0.772332491976374	-0.17198790879492	1	2116287	R	I	C1orf86	3'UTR	shore	3'UTR-shore	chr1:2116432-2116801	NA	NA			rs45459595	High-ICI hypermethylated probes
cg25067940	-0.216340585629514	0.356875847885073	-4.82645652235053	1.25568118719667e-05	0.0111837114337281	2.34442380082081	0.507906068041526	0.291565482412013	-0.216340585629514	19	7698583	F	II	PCP2	TSS200	shelf	TSS200-shelf	chr19:7701661-7702336	NA	NA				High-ICI hypermethylated probes
cg00061413	-0.249821332827065	0.37002257180299	-4.82493587157384	1.26231268976564e-05	0.0111837114337281	2.33928087555111	0.544426143776602	0.294604810949536	-0.249821332827065	5	168007339	R	II	PANK3	TSS1500	shore	TSS1500-shore	chr5:168006098-168006918	NA	NA				High-ICI hypermethylated probes
cg25548350	-0.288201722825116	0.63318619118282	-4.8243860906903	1.26471871298837e-05	0.0111837114337281	2.33742163737409	0.834383620324882	0.546181897499766	-0.288201722825116	8	142277364	R	II		IGR	opensea	IGR-opensea		NA	NA				High-ICI hypermethylated probes
cg23972767	-0.28493223046554	0.447111715755206	-4.82330674817133	1.26945537035807e-05	0.0111837114337281	2.33377177189098	0.646026669099074	0.361094438633534	-0.28493223046554	7	4277473	F	I	SDK1	Body	opensea	Body-opensea		NA	NA				High-ICI hypermethylated probes
cg01034973	-0.191477282973275	0.586663425398297	-4.82154510099234	1.2772237159985e-05	0.0111837114337281	2.32781531568756	0.720336245587187	0.528858962613912	-0.191477282973275	8	143459908	F	II	TSNARE1	5'UTR	opensea	5'UTR-opensea		NA	NA				High-ICI hypermethylated probes
cg12242345	-0.252803930368968	0.564263987664547	-4.82057219925586	1.28153390090278e-05	0.0111837114337281	2.32452610854788	0.740749750374958	0.48794582000599	-0.252803930368968	10	100061625	F	II		IGR	opensea	IGR-opensea		NA	TRUE				High-ICI hypermethylated probes
cg21247874	-0.215627973392296	0.386334666111065	-4.81878519803909	1.28948795372339e-05	0.0111837114337281	2.31848523370137	0.536867402252857	0.321239428860561	-0.215627973392296	9	37487279	R	II	POLR1E	Body	shore	Body-shore	chr9:37485801-37486099	TRUE	TRUE				High-ICI hypermethylated probes
cg06354193	-0.211882420013425	0.227199700055853	-4.81832126279511	1.29156086609767e-05	0.0111837114337281	2.31691706137222	0.375117615914282	0.163235195900857	-0.211882420013425	1	3183072	R	II	PRDM16	Body	island	Body-island	chr1:3182821-3183216	NA	NA				High-ICI hypermethylated probes
cg07950296	-0.14412149721047	0.224807903621748	-4.81828751968015	1.29171176143966e-05	0.0111837114337281	2.31680300670548	0.32542102431585	0.18129952710538	-0.14412149721047	14	60194823	R	II	RTN1	Body	shore	Body-shore	chr14:60193831-60194302	NA	NA				High-ICI hypermethylated probes
cg23200506	-0.20101833308418	0.437172581999169	-4.81566304128384	1.30350127438998e-05	0.0112220125017713	2.3079329726427	0.577506135284352	0.376487802200172	-0.20101833308418	11	116694171	R	II	APOA4	TSS200	shore	TSS200-shore	chr11:116691949-116692360	NA	NA				High-ICI hypermethylated probes
cg18761997	-0.2459410181135	0.476362814829	-4.81474278791313	1.30766012614144e-05	0.0112220125017713	2.3048231985566	0.648057487851632	0.402116469738132	-0.2459410181135	17	76986840	R	II		IGR	shelf	IGR-shelf	chr17:76989642-76990039	NA	NA				High-ICI hypermethylated probes
cg14373873	-0.236683532809029	0.42406595513738	-4.81444290969964	1.30901815999891e-05	0.0112220125017713	2.30380988145798	0.589297855400287	0.352614322591258	-0.236683532809029	11	113211441	F	II	TTC12	Body	opensea	Body-opensea		NA	TRUE				High-ICI hypermethylated probes
cg11173246	-0.188711792329295	0.65812147984896	-4.81286433943893	1.31618974761293e-05	0.0112223233672288	2.29847613862035	0.78986367449394	0.601151882164645	-0.188711792329295	11	841376	F	II	TSPAN4	TSS1500	shore	TSS1500-shore	chr11:842293-843396	NA	NA				High-ICI hypermethylated probes
cg18729973	-0.342153514168159	0.555395057042866	-4.81152003138673	1.32232744195258e-05	0.0112223233672288	2.29393445727546	0.794256944292336	0.452103430124177	-0.342153514168159	21	43785785	R	II	TFF1	Body	opensea	Body-opensea		NA	NA				High-ICI hypermethylated probes
cg25036197	0.220561478710763	0.314593928667851	4.80995249407923	1.32951979990734e-05	0.011249440611092	2.28863921800526	0.160617047303733	0.381178526014496	0.220561478710763	15	72876508	R	II	ARIH1	3'UTR	opensea	3'UTR-opensea		NA	TRUE			rs78317718	Low-ICI hypermethylated probes
cg21959619	-0.102089648679911	0.227242767218896	-4.8071396289969	1.34252246845878e-05	0.0113102338834699	2.27913883628467	0.298512899316192	0.196423250636281	-0.102089648679911	8	145581006	F	II	FBXL6	Body	shore	Body-shore	chr8:145581331-145582765	NA	NA				High-ICI hypermethylated probes
cg14475480	-0.207791411573394	0.450060133635982	-4.80634367504678	1.34622441305099e-05	0.0113102338834699	2.27645090736452	0.595122062470238	0.387330650896844	-0.207791411573394	17	79655469	R	II	HGS	Body	island	Body-island	chr17:79655162-79655515	NA	NA				High-ICI hypermethylated probes
cg19130860	-0.253539283305514	0.56153672781157	-4.80538758233032	1.35068439640608e-05	0.0113102338834699	2.2732224164912	0.738535850119194	0.484996566813679	-0.253539283305514	11	1959865	F	I	TNNT3	3'UTR	shore	3'UTR-shore	chr11:1958934-1959247	NA	NA				High-ICI hypermethylated probes
cg09667289	0.320326759621334	0.508733174079154	4.80449169129532	1.35487670406871e-05	0.0113102338834699	2.27019743505969	0.285108832456713	0.605435592078047	0.320326759621334	15	33165563	F	I	FMN1	Body	opensea	Body-opensea		NA	TRUE				Low-ICI hypermethylated probes
cg03365190	-0.216219802139796	0.621089198585178	-4.80300055317293	1.36188278260857e-05	0.0113102338834699	2.26516307723603	0.772035098192205	0.55581529605241	-0.216219802139796	4	1987655	F	I	WHSC2	Body	island	Body-island	chr4:1987492-1988260	NA	NA				High-ICI hypermethylated probes
cg21505886	-0.202480712077971	0.498063429207601	-4.80212380129013	1.3660187599684e-05	0.0113102338834699	2.26220328041521	0.639417888582789	0.436937176504817	-0.202480712077972	4	1724428	F	II	TMEM129	TSS1500	shore	TSS1500-shore	chr4:1722179-1723850	NA	NA				High-ICI hypermethylated probes
cg02851203	-0.311362154369591	0.550109710344446	-4.79852900509441	1.38310601426165e-05	0.0113707379887372	2.25006989729529	0.767475742640199	0.456113588270607	-0.311362154369592	1	54808689	F	II	SSBP3	Body	opensea	Body-opensea		NA	TRUE				High-ICI hypermethylated probes
cg17166812	-0.1017981945503	0.535274624910963	-4.79368898639393	1.40644378187335e-05	0.0114965128985123	2.23373907413507	0.606341289030984	0.504543094480684	-0.1017981945503	1	161169574	R	II	NDUFS2	5'UTR	shelf	5'UTR-shelf	chr1:161171809-161172256	NA	TRUE				High-ICI hypermethylated probes
cg20507963	0.34685409006154	0.492116544043808	4.7914346899034	1.41744505156388e-05	0.011513773842285	2.22613496275319	0.249973122680091	0.596827212741632	0.34685409006154	4	13541863	R	II		IGR	shore	IGR-shore	chr4:13543562-13546494	NA	NA			rs77185858	Low-ICI hypermethylated probes
cg12225794	-0.222741042251496	0.559301489518798	-4.79095408141908	1.41980137777672e-05	0.011513773842285	2.22451396975859	0.71479995297739	0.492058910725893	-0.222741042251496	12	132644731	R	II		IGR	opensea	IGR-opensea		NA	NA				High-ICI hypermethylated probes
cg25726135	-0.262031172763861	0.386012916538743	-4.78975575245402	1.42569328709513e-05	0.0115159461359156	2.22047252697045	0.568940339034269	0.306909166270408	-0.262031172763861	1	2088708	F	II	PRKCZ	Body	opensea	Body-opensea		NA	NA		rs262656		High-ICI hypermethylated probes
cg05753799	-0.173832423902503	0.307015971386595	-4.78746208332613	1.43703768721844e-05	0.0115340028672795	2.21273806519011	0.428370682412871	0.254538258510368	-0.173832423902503	20	3746315	R	II	C20orf27	5'UTR	shore	5'UTR-shore	chr20:3748053-3749407	NA	NA				High-ICI hypermethylated probes
cg19867250	-0.159586258219727	0.521151724918439	-4.78708501018125	1.43891113098845e-05	0.0115340028672795	2.21146667692562	0.632560999524664	0.472974741304937	-0.159586258219727	1	225648715	F	II		IGR	opensea	IGR-opensea		NA	TRUE				High-ICI hypermethylated probes
cg02741426	0.245475704579696	0.611057990800923	4.78529563975417	1.44783411283269e-05	0.0115340028672795	2.20543393280899	0.43968815930189	0.685163863881586	0.245475704579696	8	77619401	R	II	ZFHX4	Body	opensea	Body-opensea		NA	TRUE				Low-ICI hypermethylated probes
cg26498247	0.162631737123866	0.773932353470321	4.78347448553074	1.45697130633215e-05	0.0115340028672795	2.19929492652332	0.660396989817811	0.823028726941676	0.162631737123866	16	50003613	R	II		IGR	opensea	IGR-opensea		NA	NA				Low-ICI hypermethylated probes
cg27004182	0.140412348229706	0.761561178662553	4.78302885060875	1.45921576800976e-05	0.0115340028672795	2.19779285437415	0.663537463860683	0.803949812090388	0.140412348229706	8	56827013	F	II	LYN	5'UTR	opensea	5'UTR-opensea		NA	TRUE		rs75160967		Low-ICI hypermethylated probes
cg11984566	-0.241857113241935	0.610234238540289	-4.78302047067964	1.45925800638947e-05	0.0115340028672795	2.19776460921988	0.779077883633716	0.537220770391781	-0.241857113241935	2	74247286	R	II		IGR	opensea	IGR-opensea		NA	TRUE				High-ICI hypermethylated probes
cg00293381	-0.143021224458078	0.554588672829354	-4.78259474152233	1.46140543955421e-05	0.0115340028672795	2.19632968363686	0.654433678583106	0.511412454125028	-0.143021224458078	12	121177413	R	II	ACADS	3'UTR	shore	3'UTR-shore	chr12:121177115-121177341	NA	NA				High-ICI hypermethylated probes
cg23719877	-0.128635975291602	0.588734642001677	-4.7817997135665	1.46542396459538e-05	0.0115340028672795	2.19365016401295	0.678537115318456	0.549901140026854	-0.128635975291602	7	128492916	F	II	FLNC	Body	shore	Body-shore	chr7:128494059-128494309	NA	NA				High-ICI hypermethylated probes
cg02813916	-0.226076956699812	0.388106267662498	-4.78159704875575	1.46645008027786e-05	0.0115340028672795	2.19296714096316	0.545933577056707	0.319856620356895	-0.226076956699812	6	30956760	R	II	MUC21	3'UTR	opensea	3'UTR-opensea		NA	NA				High-ICI hypermethylated probes
cg03323597	-0.156829614741989	0.341283119801711	-4.78141770124065	1.46735872541735e-05	0.0115340028672795	2.19236271144909	0.450767945187628	0.293938330445639	-0.156829614741989	16	1131489	R	II		IGR	shore	IGR-shore	chr16:1128223-1130394	NA	NA			rs57884364	High-ICI hypermethylated probes
cg21761639	-0.253281347942515	0.288066660207172	-4.77868529777218	1.48127063389177e-05	0.0115480542534054	2.18315516497671	0.464885714431192	0.211604366488677	-0.253281347942515	7	31533786	F	II		IGR	opensea	IGR-opensea		NA	TRUE		rs35019289		High-ICI hypermethylated probes
cg16760981	-0.307063272307486	0.541285791430209	-4.77829943322329	1.48324563942002e-05	0.0115480542534054	2.18185505799652	0.755650717380718	0.448587445073233	-0.307063272307486	11	63688531	R	II		IGR	shelf	IGR-shelf	chr11:63683743-63684628	NA	NA				High-ICI hypermethylated probes
cg13731808	-0.181130499277009	0.739294957838235	-4.77538007609604	1.49827195649854e-05	0.0115988907610023	2.17202008464176	0.865744551673128	0.684614052396119	-0.181130499277009	9	138250282	R	I		IGR	opensea	IGR-opensea		NA	NA				High-ICI hypermethylated probes
cg15505277	-0.139060213197795	0.747977411926658	-4.77118586127421	1.52012173436351e-05	0.0116930109855859	2.15789434953355	0.845057183404365	0.705996970206569	-0.139060213197795	1	5894894	F	II		IGR	opensea	IGR-opensea		NA	NA		rs72644704		High-ICI hypermethylated probes
cg18966232	-0.326318233349116	0.373519209017453	-4.77060694787385	1.52316201971437e-05	0.0116930109855859	2.15594500060791	0.60132627758193	0.275008044232814	-0.326318233349116	1	3183165	F	I	PRDM16	Body	island	Body-island	chr1:3182821-3183216	NA	NA				High-ICI hypermethylated probes
cg02657760	0.216481349458402	0.597223635809636	4.76941323653201	1.52944987954691e-05	0.0116930109855859	2.15192576085343	0.446095146565091	0.662576496023493	0.216481349458401	2	219157083	R	I	PNKD	Body	island	Body-island	chr2:219156977-219157380	NA	NA				Low-ICI hypermethylated probes
cg03379649	-0.199139309127712	0.289863059444822	-4.76842093182498	1.53469619861946e-05	0.0116930109855859	2.14858495749788	0.428884841288696	0.229745532160984	-0.199139309127712	12	50237340	R	II	BCDIN3D	TSS1500	shore	TSS1500-shore	chr12:50236638-50236975	NA	NA				High-ICI hypermethylated probes
cg27389692	-0.267964712508265	0.620343704433723	-4.76826718711062	1.53551062468859e-05	0.0116930109855859	2.14806736766172	0.807413409392323	0.539448696884059	-0.267964712508265	4	5896599	R	II		IGR	shore	IGR-shore	chr4:5894071-5895116	NA	NA				High-ICI hypermethylated probes
cg15442434	-0.182662541148478	0.296775897873835	-4.76751840261335	1.53948319413558e-05	0.0116930109855859	2.14554663734865	0.424295030373716	0.241632489225238	-0.182662541148478	6	170210649	R	II		IGR	opensea	IGR-opensea		TRUE	TRUE				High-ICI hypermethylated probes
cg13168012	-0.104330029035788	0.164114150195341	-4.76658412609386	1.54445399770168e-05	0.0116930109855859	2.14240167743987	0.236948321409004	0.132618292373217	-0.104330029035788	11	60692978	F	II	TMEM132A	Body	shore	Body-shore	chr11:60691785-60692532	NA	NA				High-ICI hypermethylated probes
cg07001918	0.202004249163637	0.587304280718366	4.76449669822957	1.55561705125586e-05	0.0117014036870863	2.13537584964663	0.446282446396582	0.648286695560218	0.202004249163637	7	7189008	F	II		IGR	opensea	IGR-opensea		NA	NA			rs73674657	Low-ICI hypermethylated probes
cg03732759	0.225228083448467	0.425247080431903	4.76427986240364	1.55678116163834e-05	0.0117014036870863	2.13464609626383	0.268012380665993	0.493240464114459	0.225228083448466	4	139480684	R	II		IGR	shore	IGR-shore	chr4:139481734-139481996	NA	NA				Low-ICI hypermethylated probes
cg14638453	-0.153874696668622	0.333766535142707	-4.76419615182995	1.55723080084342e-05	0.0117014036870863	2.13436437472419	0.441188493194387	0.287313796525765	-0.153874696668622	11	63804481	R	II	MACROD1	Body	shore	Body-shore	chr11:63803375-63804365	NA	NA				High-ICI hypermethylated probes
cg10365886	-0.305590303712033	0.204107150276236	-4.76037307618633	1.5779021485856e-05	0.0117827293415274	2.12150016518533	0.417443777395957	0.111853473683924	-0.305590303712034	6	32063874	F	I	TNXB	Body	island	Body-island	chr6:32063533-32065044	NA	NA		rs41270458		High-ICI hypermethylated probes
cg17186803	-0.202978114383457	0.296069771239389	-4.76006816713383	1.57956232534651e-05	0.0117827293415274	2.12047435500791	0.437771473733501	0.234793359350044	-0.202978114383457	11	118023038	F	II	SCN4B	Body	shore	Body-shore	chr11:118023352-118024194	TRUE	NA				High-ICI hypermethylated probes
cg21078322	-0.223174943233745	0.33224659948706	-4.75929158146528	1.5837984380544e-05	0.0117928479844121	2.11786179200587	0.488047974952128	0.264873031718383	-0.223174943233745	6	134491163	F	II	SGK1	3'UTR	opensea	3'UTR-opensea		NA	NA				High-ICI hypermethylated probes
cg02595114	-0.201459879515642	0.360829186156195	-4.7583951614069	1.58870207119408e-05	0.0117988541102953	2.11484629347458	0.501470988836926	0.300011109321284	-0.201459879515642	7	30211726	R	I		IGR	opensea	IGR-opensea		NA	TRUE				High-ICI hypermethylated probes
cg24871482	-0.23226745689291	0.558503042802363	-4.75809136759472	1.59036727066974e-05	0.0117988541102953	2.1138244013345	0.720652022142697	0.488384565249786	-0.23226745689291	2	100824662	F	II		IGR	opensea	IGR-opensea		NA	NA				High-ICI hypermethylated probes
cg03362871	-0.163703741795209	0.33784326254915	-4.75285613448043	1.61933367030507e-05	0.0119102641219468	2.09621830126371	0.452127006821277	0.288423265026068	-0.163703741795209	22	50352912	F	II	PIM3	TSS1500	shore	TSS1500-shore	chr22:50353596-50357215	NA	NA				High-ICI hypermethylated probes
cg25045868	-0.295566167428874	0.435025416848485	-4.75264879915978	1.62049143473348e-05	0.0119102641219468	2.09552118850208	0.64136406203468	0.345797894605806	-0.295566167428874	22	36052486	R	II	APOL6	Body	opensea	Body-opensea		NA	TRUE			rs5750145	High-ICI hypermethylated probes
cg03249863	-0.233597515308594	0.474529898194717	-4.75209249346438	1.62360186723685e-05	0.0119102641219468	2.09365080973876	0.637607408881848	0.404009893573254	-0.233597515308594	12	58147425	F	II	CDK4	TSS1500	shore	TSS1500-shore	chr12:58148888-58149781	NA	NA				High-ICI hypermethylated probes
cg08639843	-0.161944012584475	0.454351269659439	-4.7503445449644	1.63341317890978e-05	0.0119144599511062	2.08777451763552	0.567406523727846	0.405462511143371	-0.161944012584475	11	844536	F	II	TSPAN4	5'UTR	shore	5'UTR-shore	chr11:842293-843396	NA	NA				High-ICI hypermethylated probes
cg07112604	-0.18083527243446	0.396271249019948	-4.74953933247961	1.63795240167237e-05	0.0119144599511062	2.08506782192548	0.522514741096835	0.341679468662375	-0.18083527243446	14	91836354	R	II	CCDC88C	Body	opensea	Body-opensea		TRUE	TRUE				High-ICI hypermethylated probes
cg17875845	0.208536533596789	0.729471639329821	4.74827699070892	1.64509349627718e-05	0.0119451872190852	2.08082486365041	0.583889530969799	0.792426064566588	0.208536533596789	4	87932378	F	II	AFF1	Body	shelf	Body-shelf	chr4:87927928-87928667	NA	NA				Low-ICI hypermethylated probes
cg22434923	0.228059881076162	0.623856323433067	4.74723809866949	1.65099341537194e-05	0.0119566785306794	2.07733329267571	0.464644708342162	0.692704589418324	0.228059881076162	21	46289921	F	II	PTTG1IP	Body	shelf	Body-shelf	chr21:46292709-46294744	TRUE	NA		rs2282114		Low-ICI hypermethylated probes
cg02089348	-0.170191422119366	0.441224628902659	-4.74577458319726	1.65933999326241e-05	0.0119848830702078	2.07241513135224	0.560037508495424	0.389846086376058	-0.170191422119366	4	1724449	R	II	TMEM129	TSS1500	shore	TSS1500-shore	chr4:1722179-1723850	NA	NA				High-ICI hypermethylated probes
cg05504759	-0.191059554448572	0.534194983972712	-4.74449544828951	1.66666889059429e-05	0.0119856428251197	2.06811707171844	0.667576182361338	0.476516627912766	-0.191059554448572	3	52087583	R	II	DUSP7	Body	shelf	Body-shelf	chr3:52089652-52090845	TRUE	TRUE				High-ICI hypermethylated probes
cg23246509	-0.208225212485968	0.426768692487624	-4.74439838466999	1.66722631702431e-05	0.0119856428251197	2.06779094394804	0.572133463468394	0.363908250982426	-0.208225212485968	11	60689766	R	II	TMEM109	3'UTR	shelf	3'UTR-shelf	chr11:60691785-60692532	NA	NA				High-ICI hypermethylated probes
cg22372131	-0.216859247522523	0.378113178733964	-4.74268628095204	1.67708884479914e-05	0.0119856428251197	2.06203881301545	0.529505483608178	0.312646236085655	-0.216859247522523	6	30956603	F	II	MUC21	3'UTR	opensea	3'UTR-opensea		NA	NA				High-ICI hypermethylated probes
cg09407967	-0.259919263464188	0.500352665551275	-4.74266105974619	1.67723455741748e-05	0.0119856428251197	2.06195408379431	0.681805736271557	0.421886472807369	-0.259919263464188	6	41375649	F	II		IGR	shore	IGR-shore	chr6:41376590-41377167	TRUE	TRUE		rs13193411		High-ICI hypermethylated probes
cg01886855	-0.375877054737865	0.539225324538175	-4.74229774364344	1.67933495174183e-05	0.0119856428251197	2.06073356349804	0.801630060864609	0.425753006126744	-0.375877054737865	21	43786997	R	II	TFF1	TSS1500	opensea	TSS1500-opensea		NA	NA				High-ICI hypermethylated probes
cg05923519	0.235087497919342	0.428854694027374	4.74219361952227	1.67993738674896e-05	0.0119856428251197	2.06038377681213	0.264737006800663	0.499824504720005	0.235087497919341	13	47237842	F	II	LRCH1	Body	opensea	Body-opensea		NA	TRUE		rs9534457		Low-ICI hypermethylated probes
cg11143876	-0.194254060977974	0.572832296223095	-4.74147033181429	1.68412799061895e-05	0.0119856428251197	2.05795410240402	0.708443621811492	0.514189560833519	-0.194254060977973	1	3376815	F	II	ARHGEF16	5'UTR	opensea	5'UTR-opensea		NA	NA				High-ICI hypermethylated probes
cg21461981	-0.338217798639321	0.600064306162527	-4.74017835248835	1.69163900531815e-05	0.0119856428251197	2.05361443770485	0.836178618420165	0.497960819780845	-0.338217798639321	1	202003813	F	II		IGR	opensea	IGR-opensea		TRUE	TRUE				High-ICI hypermethylated probes
cg04993257	0.135660450295886	0.322031506993971	4.73852950375053	1.70127240603137e-05	0.0120330791597997	2.04807675216529	0.227325154900616	0.362985605196503	0.135660450295886	19	5568163	F	II	PLAC2	TSS200	shore	TSS200-shore	chr19:5567518-5567939	TRUE	NA				Low-ICI hypermethylated probes
cg11333375	-0.31891644591113	0.504524024311492	-4.73609918939913	1.71556961886585e-05	0.0120583431909181	2.03991588830091	0.727163807306055	0.408247361394925	-0.31891644591113	1	2316488	F	I	MORN1	Body	island	Body-island	chr1:2316353-2316749	NA	NA		rs58981764		High-ICI hypermethylated probes
cg01859549	0.219225647106282	0.624303859559281	4.7347981142738	1.72327199315324e-05	0.0120583431909181	2.03554762836964	0.47125953988131	0.690485186987593	0.219225647106283	11	118484557	F	II	PHLDB1	Body	shelf	Body-shelf	chr11:118478235-118481896	NA	TRUE				Low-ICI hypermethylated probes
cg03752203	-0.193241686690085	0.373341432867671	-4.7346761396566	1.7239958188429e-05	0.0120583431909181	2.03513813227269	0.508246006594712	0.315004319904626	-0.193241686690086	8	103874399	F	II	AZIN1	5'UTR	shore	5'UTR-shore	chr8:103875222-103877084	NA	NA				High-ICI hypermethylated probes
cg27070808	-0.243941946742328	0.543329813721061	-4.73457612812875	1.72458953275584e-05	0.0120583431909181	2.0348023742957	0.713628908616648	0.46968696187432	-0.243941946742328	7	150745657	F	II	ACCN3	1stExon	shore	1stExon-shore	chr7:150746002-150746381	NA	NA				High-ICI hypermethylated probes
cg08441839	-0.224817221440457	0.412753302776512	-4.73397504363355	1.7281620670165e-05	0.0120583431909181	2.0327844768635	0.569701174348151	0.344883952907694	-0.224817221440457	6	168091995	R	II		IGR	opensea	IGR-opensea		NA	TRUE				High-ICI hypermethylated probes
cg11458214	-0.255359064286466	0.554679479752375	-4.73174419090236	1.74148461535366e-05	0.0120583431909181	2.02529617972698	0.732949015197643	0.477589950911178	-0.255359064286466	4	1542654	F	II		IGR	island	IGR-island	chr4:1542408-1542655	TRUE	NA		rs58300082		High-ICI hypermethylated probes
cg06087554	-0.139746705153302	0.313529720900186	-4.73141905845076	1.74343467536364e-05	0.0120583431909181	2.02420492518045	0.411088741478907	0.271342036325605	-0.139746705153302	16	31151917	R	I	PRSS36	Body	shore	Body-shore	chr16:31153556-31154474	NA	NA				High-ICI hypermethylated probes
cg21585977	0.263646252585725	0.504035498547756	4.73140540214124	1.74351662917048e-05	0.0120583431909181	2.02415909063356	0.319980567497345	0.58362682008307	0.263646252585725	8	74416786	F	II	STAU2	Body	opensea	Body-opensea		NA	TRUE				Low-ICI hypermethylated probes
cg12140975	-0.206207410503177	0.281732973167561	-4.73060792109376	1.74830899957647e-05	0.0120583431909181	2.02148260313894	0.42568908993393	0.219481679430752	-0.206207410503177	1	33351568	F	II	HPCA	TSS1500	shore	TSS1500-shore	chr1:33351686-33352397	TRUE	NA				High-ICI hypermethylated probes
cg15254287	-0.227151200227226	0.387908019526319	-4.73025950307792	1.75040682700701e-05	0.0120583431909181	2.02031330672463	0.546485272515137	0.319334072287911	-0.227151200227226	17	76986702	F	II		IGR	shelf	IGR-shelf	chr17:76989642-76990039	NA	NA				High-ICI hypermethylated probes
cg19308769	-0.173154303265368	0.397567270592872	-4.72991643963726	1.75247482452894e-05	0.0120583431909181	2.01916201368808	0.518448576646053	0.345294273380685	-0.173154303265368	1	31289850	F	II		IGR	opensea	IGR-opensea		TRUE	TRUE				High-ICI hypermethylated probes
cg07423050	-0.236483780711448	0.59780026318325	-4.72905583078412	1.75767314447406e-05	0.0120583431909181	2.01627402591537	0.762892713868601	0.526408933157153	-0.236483780711448	13	99094983	F	I	FARP1	Body	opensea	Body-opensea		NA	NA		rs9517298		High-ICI hypermethylated probes
cg10394757	-0.23161363198802	0.60457220712322	-4.7289239884163	1.75847084306095e-05	0.0120583431909181	2.01583161434762	0.766264742662027	0.534651110674007	-0.23161363198802	16	66879807	F	II	CA7	Body	shore	Body-shore	chr16:66878172-66879072	TRUE	NA				High-ICI hypermethylated probes
cg09030187	-0.244257831876729	0.665846101847602	-4.72872965707771	1.75964727153336e-05	0.0120583431909181	2.01517952307969	0.836365720327583	0.592107888450854	-0.244257831876729	1	205263738	R	II		IGR	opensea	IGR-opensea		TRUE	TRUE				High-ICI hypermethylated probes
cg10869131	-0.137473630922849	0.290870414414881	-4.72854116058214	1.76078911428554e-05	0.0120583431909181	2.01454702115194	0.386842571851587	0.249368940928738	-0.137473630922849	4	3775787	R	II		IGR	shore	IGR-shore	chr4:3773851-3774062	NA	NA				High-ICI hypermethylated probes
cg26222731	-0.182338392205381	0.674103618093911	-4.72725957636806	1.76857175443965e-05	0.0120741240796495	2.01024691724592	0.801396457935403	0.619058065730023	-0.182338392205381	15	57695943	F	II	CGNL1	5'UTR	opensea	5'UTR-opensea		NA	TRUE				High-ICI hypermethylated probes
cg03983364	-0.21040874805954	0.450646546553415	-4.72719084106067	1.76899011242015e-05	0.0120741240796495	2.01001630249683	0.597535672557246	0.387126924497705	-0.21040874805954	7	101272096	F	II	MYL10	Body	opensea	Body-opensea		NA	NA				High-ICI hypermethylated probes
cg12750745	0.314051742457303	0.367120300773243	4.72626162057638	1.77465534565917e-05	0.0120885423033959	2.0068987929976	0.147876631510598	0.461928373967901	0.314051742457303	1	44509022	R	I		IGR	opensea	IGR-opensea		NA	NA				Low-ICI hypermethylated probes
cg14935716	0.248803171637456	0.552904710276643	4.7258768805385	1.77700621368225e-05	0.0120885423033959	2.0056080718176	0.379211930076909	0.628015101714365	0.248803171637456	8	133805351	F	II	PHF20L1	Body	opensea	Body-opensea		NA	TRUE				Low-ICI hypermethylated probes
cg24537688	-0.319245998434691	0.603786004342139	-4.72414035973827	1.78765485882035e-05	0.0121408149869529	1.99978293217549	0.82665585230598	0.507409853871289	-0.319245998434691	2	137250617	R	II		IGR	opensea	IGR-opensea		NA	NA				High-ICI hypermethylated probes
cg12669354	-0.248246895068363	0.692434792480434	-4.72311138707702	1.79399417117901e-05	0.0121636963070572	1.99633165614282	0.865739228660234	0.617492333591871	-0.248246895068363	11	831584	R	I	CD151	TSS1500	island	TSS1500-island	chr11:829284-833558	TRUE	TRUE				High-ICI hypermethylated probes
cg11701615	-0.216928548629474	0.466613998332002	-4.72062645828012	1.80939432734524e-05	0.0121700380290727	1.98799819185177	0.618054683224277	0.401126134594803	-0.216928548629474	20	61153635	R	II	C20orf166	Body	shore	Body-shore	chr20:61151586-61151903	NA	NA				High-ICI hypermethylated probes
cg02741882	0.106353068932144	0.787386927400689	4.71999272146386	1.81334254600668e-05	0.0121700380290727	1.98587316946862	0.713140445315984	0.819493514248129	0.106353068932144	16	29888096	F	I	SEZ6L2	Body	island	Body-island	chr16:29887788-29888316	TRUE	TRUE				Low-ICI hypermethylated probes
cg15304404	0.124001716997002	0.400834667890141	4.71954414442354	1.8161423087307e-05	0.0121700380290727	1.98436908649466	0.314267431496008	0.43826914849301	0.124001716997002	6	163826969	F	II		IGR	opensea	IGR-opensea		NA	TRUE		rs74591977		Low-ICI hypermethylated probes
cg26814100	0.105215372317596	0.850023687128449	4.71839834652698	1.82331296694614e-05	0.0121700380290727	1.98052747389283	0.776571446076542	0.881786818394139	0.105215372317596	6	136724451	F	II	MAP7	Body	opensea	Body-opensea		TRUE	TRUE				Low-ICI hypermethylated probes
cg21002264	-0.12452621457905	0.390146619708685	-4.71735670879517	1.82985583350415e-05	0.0121849356109207	1.97703541021164	0.477080014792172	0.352553800213122	-0.12452621457905	17	8091665	R	II	C17orf59	3'UTR	shore	3'UTR-shore	chr17:8092418-8093706	NA	NA				High-ICI hypermethylated probes
cg09487985	-0.198712792583246	0.407354543509589	-4.71617693910602	1.83729413471767e-05	0.0122072126223812	1.97308063377539	0.546078568520534	0.347365775937288	-0.198712792583246	12	34484805	F	II		IGR	shelf	IGR-shelf	chr12:34488610-34489037	NA	NA				High-ICI hypermethylated probes
cg01823925	0.119154049624104	0.716185350928306	4.71588127729196	1.83916288294497e-05	0.0122072126223812	1.97208958994644	0.633002335152988	0.752156384777092	0.119154049624104	5	156967901	R	II	ADAM19	Body	opensea	Body-opensea		NA	TRUE		rs72811330		Low-ICI hypermethylated probes
cg08548409	-0.173891544445214	0.307682596530056	-4.71306199468698	1.85707612218997e-05	0.0122641679487455	1.96264073867739	0.429078580388036	0.255187035942822	-0.173891544445214	3	61550635	F	II	PTPRG	Body	shore	Body-shore	chr3:61546328-61549669	TRUE	NA				High-ICI hypermethylated probes
cg12138450	-0.257805884359853	0.670386575723097	-4.71278611831142	1.85883814718483e-05	0.0122641679487455	1.96171625763755	0.850364268578089	0.592558384218236	-0.257805884359853	14	34320864	F	II		IGR	opensea	IGR-opensea		NA	TRUE				High-ICI hypermethylated probes
cg03127370	-0.213743511082577	0.60366716595756	-4.71275225439403	1.85905454917132e-05	0.0122641679487455	1.96160277876961	0.752884334071811	0.539140822989234	-0.213743511082577	16	2520192	R	II	NTN3	TSS1500	shore	TSS1500-shore	chr16:2521086-2525929	NA	TRUE				High-ICI hypermethylated probes
cg21068480	-0.261499130324029	0.312177250503998	-4.71142149705383	1.86757811197419e-05	0.0122641679487455	1.95714363417908	0.494733247145301	0.233234116821272	-0.261499130324029	2	85980500	R	II	ATOH8	TSS1500	island	TSS1500-island	chr2:85980499-85982198	NA	NA				High-ICI hypermethylated probes
cg25815024	-0.314825837718351	0.496126445891324	-4.70837748413889	1.88721935593579e-05	0.0122641679487455	1.94694555017233	0.715910521279608	0.401084683561256	-0.314825837718352	2	219696567	R	I	PRKAG3	TSS200	opensea	TSS200-opensea		NA	NA				High-ICI hypermethylated probes
cg13280043	-0.255111547415634	0.538684602306939	-4.70817492294979	1.88853352217979e-05	0.0122641679487455	1.9462670210955	0.716781342955588	0.461669795539955	-0.255111547415634	4	5895913	R	II	CRMP1	TSS1500	shore	TSS1500-shore	chr4:5894071-5895116	NA	NA				High-ICI hypermethylated probes
cg24946791	-0.189987890320551	0.596455911334423	-4.70734938839245	1.89389866118246e-05	0.0122641679487455	1.94350180861899	0.729088966841223	0.539101076520672	-0.18998789032055	17	7534937	F	II	SHBG	Body	shelf	Body-shelf	chr17:7530705-7531251	NA	NA				High-ICI hypermethylated probes
cg07863402	-0.209682147187916	0.624136754741171	-4.70716714923666	1.89508504146865e-05	0.0122641679487455	1.94289140606869	0.770518631079905	0.560836483891989	-0.209682147187917	17	77863987	R	II		IGR	opensea	IGR-opensea		NA	NA				High-ICI hypermethylated probes
cg16815625	-0.353168727701595	0.732606646603814	-4.70589812473871	1.9033666233071e-05	0.0122641679487455	1.93864112310341	0.979158399904927	0.625989672203332	-0.353168727701595	8	141229477	R	I	TRAPPC9	Body	opensea	Body-opensea		NA	NA			rs76920047	High-ICI hypermethylated probes
cg26234658	0.219013498059207	0.357628431435267	4.70541000677293	1.90656148486441e-05	0.0122641679487455	1.93700641520573	0.204732215809028	0.423745713868235	0.219013498059207	7	36343787	R	II		IGR	opensea	IGR-opensea		TRUE	NA				Low-ICI hypermethylated probes
cg02973377	-0.136332445657193	0.511572636120998	-4.70454765626062	1.91221864042939e-05	0.0122641679487455	1.93411856791304	0.606748117051492	0.470415671394298	-0.136332445657193	19	15342548	F	II	EPHX3	Body	shore	Body-shore	chr19:15342626-15343181	NA	NA				High-ICI hypermethylated probes
cg07888300	0.149103582027668	0.806055302787891	4.70453443820807	1.91230548076039e-05	0.0122641679487455	1.93407430482813	0.701964122881783	0.851067704909451	0.149103582027668	16	57879672	F	II		IGR	opensea	IGR-opensea		NA	TRUE		rs411388		Low-ICI hypermethylated probes
cg15339960	0.185056992753164	0.683639287971915	4.70341177622123	1.91969529138983e-05	0.0122641679487455	1.93031504619961	0.554448557181971	0.739505549935135	0.185056992753164	5	45693264	R	II	HCN1	Body	shelf	Body-shelf	chr5:45695394-45696510	NA	NA				Low-ICI hypermethylated probes
cg01171858	-0.235984625965701	0.580240548157643	-4.70291451700704	1.92297738236697e-05	0.0122641679487455	1.92865007762016	0.744984532322378	0.508999906356677	-0.235984625965701	16	31494347	R	II	SLC5A2	TSS200	opensea	TSS200-opensea		NA	NA				High-ICI hypermethylated probes
cg09951637	-0.191376058374326	0.41761992788646	-4.7024285217418	1.92619043797518e-05	0.0122641679487455	1.92702289224354	0.551222081845896	0.359846023471569	-0.191376058374326	11	33951810	F	II		IGR	opensea	IGR-opensea		NA	TRUE			rs731629	High-ICI hypermethylated probes
cg17989581	-0.326320552931074	0.632983082827345	-4.70165397055136	1.93132209231656e-05	0.0122641679487455	1.92442971759116	0.860791770722623	0.534471217791549	-0.326320552931074	5	314590	R	I	AHRR	Body	opensea	Body-opensea		NA	NA				High-ICI hypermethylated probes
cg15011596	-0.189419009808763	0.572696419792488	-4.70020061674906	1.94098719729044e-05	0.0122641679487455	1.91956439439033	0.704932332300493	0.515513322491729	-0.189419009808763	6	30627459	R	II	DHX16	Body	opensea	Body-opensea		NA	NA				High-ICI hypermethylated probes
cg18555698	-0.249305689000364	0.646258063058106	-4.69958618221203	1.94508754827116e-05	0.0122641679487455	1.91750766284369	0.820301657265908	0.570995968265544	-0.249305689000364	11	12699172	F	II	TEAD1	5'UTR	shelf	5'UTR-shelf	chr11:12695414-12696981	NA	NA				High-ICI hypermethylated probes
cg22226592	0.15207151504328	0.542250838278575	4.6990483772149	1.94868348375462e-05	0.0122641679487455	1.91570752633792	0.436087705135154	0.588159220178433	0.15207151504328	1	109439213	F	II	GPSM2	Body	opensea	Body-opensea		NA	TRUE				Low-ICI hypermethylated probes
cg15806880	-0.204390780977776	0.652104368980446	-4.69859617202007	1.95171211023389e-05	0.0122641679487455	1.91419397285022	0.794792272681912	0.590401491704136	-0.204390780977776	11	624603	R	II	MUPCDH	Body	shore	Body-shore	chr11:624780-625053	NA	NA				High-ICI hypermethylated probes
cg07236127	-0.233812430471549	0.636541723047412	-4.69631517418913	1.96705942050619e-05	0.0123231224735324	1.90656025121101	0.799769268848304	0.565956838376755	-0.233812430471549	1	201391627	R	II	TNNI1	TSS1500	opensea	TSS1500-opensea		NA	NA				High-ICI hypermethylated probes
cg20376123	-0.125682518841247	0.556656148354124	-4.69579168072889	1.97059829969295e-05	0.0123231224735324	1.90480850750407	0.644396774714995	0.518714255873748	-0.125682518841247	22	46760595	R	I	CELSR1	Body	island	Body-island	chr22:46760450-46760679	NA	NA				High-ICI hypermethylated probes
cg14170787	0.106533540275079	0.815812337532254	4.69573636677749	1.97097259274472e-05	0.0123231224735324	1.90462341739083	0.741439866019463	0.847973406294543	0.106533540275079	9	112889386	F	II	AKAP2	Body	opensea	Body-opensea		NA	TRUE				Low-ICI hypermethylated probes
cg13874654	-0.114491843575158	0.295704820295363	-4.6935638227717	1.98572875227801e-05	0.0123964566006922	1.89735440099285	0.375633088451605	0.261141244876447	-0.114491843575158	17	9019336	R	II	NTN1	Body	shore	Body-shore	chr17:9018996-9019207	TRUE	TRUE				High-ICI hypermethylated probes
cg09540676	-0.125234321421512	0.216895007588933	-4.69061189141027	2.00595209805679e-05	0.0124760902173082	1.88747983942931	0.304322741411497	0.179088419989986	-0.125234321421512	3	193721417	R	II		IGR	shore	IGR-shore	chr3:193720953-193721291	NA	TRUE				High-ICI hypermethylated probes
cg23286081	-0.325239155547502	0.589302611411432	-4.68992731878455	2.01067076166676e-05	0.0124760902173082	1.88519022033717	0.816356361510632	0.49111720596313	-0.325239155547502	10	125775778	R	II	CHST15	Body	opensea	Body-opensea		NA	TRUE				High-ICI hypermethylated probes
cg00325531	0.221060485720021	0.691073827006807	4.68919517931437	2.01572932632159e-05	0.0124885562494883	1.88274165854373	0.536748582258867	0.757809067978889	0.221060485720021	1	75591353	F	II		IGR	island	IGR-island	chr1:75590817-75591354	NA	NA				Low-ICI hypermethylated probes
cg16413675	-0.252596002330242	0.527764986248324	-4.68827908870315	2.02207641917651e-05	0.0125089557045269	1.87967810920371	0.704105591648681	0.451509589318439	-0.252596002330242	16	2520055	F	II	NTN3	TSS1500	shore	TSS1500-shore	chr16:2521086-2525929	NA	TRUE				High-ICI hypermethylated probes
cg14214797	-0.135943915212285	0.225760595634589	-4.68678515829842	2.03246905565519e-05	0.0125542823904411	1.8746826922248	0.320664838329958	0.184720923117673	-0.135943915212285	14	91860613	R	II	CCDC88C	Body	opensea	Body-opensea		NA	TRUE				High-ICI hypermethylated probes
cg05280806	-0.219576521388727	0.386372256407222	-4.6848553897828	2.04597108214643e-05	0.0126186499004081	1.86823086822746	0.539661526055956	0.320085004667229	-0.219576521388727	17	79366205	F	I		IGR	shore	IGR-shore	chr17:79366806-79374742	NA	TRUE				High-ICI hypermethylated probes
cg10365769	-0.28736552849901	0.501053276092706	-4.68330259872432	2.05689924447644e-05	0.0126669732329843	1.86304017863069	0.701666946931638	0.414301418432628	-0.28736552849901	4	7589937	F	II	SORCS2	Body	shelf	Body-shelf	chr4:7593369-7593586	NA	NA		rs11730130		High-ICI hypermethylated probes
cg21393885	-0.247404023816249	0.475034573364091	-4.68235236314297	2.06361493855515e-05	0.0126776627883386	1.8598640624719	0.647750589990529	0.40034656617428	-0.247404023816249	17	79313913	F	II		IGR	shore	IGR-shore	chr17:79314962-79320653	NA	TRUE				High-ICI hypermethylated probes
cg06198069	-0.106800796670981	0.55522035713442	-4.68218126609519	2.06482642855932e-05	0.0126776627883386	1.8592922066326	0.629779403866991	0.522978607196011	-0.10680079667098	20	36151184	F	I	BLCAP	5'UTR	island	5'UTR-island	chr20:36150920-36151240	NA	NA				High-ICI hypermethylated probes
cg22493372	-0.139518731035743	0.356124993174163	-4.68105380858654	2.07282707057269e-05	0.0127077332171161	1.85552412897409	0.453524862010436	0.314006130974693	-0.139518731035743	7	73631888	F	I	LAT2	Body	opensea	Body-opensea		NA	NA				High-ICI hypermethylated probes
cg23436042	-0.188782473307462	0.454818850020888	-4.67959365148567	2.08323373390268e-05	0.0127367893174935	1.85064468169389	0.586610387990248	0.397827914682787	-0.188782473307462	5	175322631	F	II		IGR	opensea	IGR-opensea		NA	TRUE				High-ICI hypermethylated probes
cg14454127	-0.281289866526832	0.456998099341228	-4.67788077799558	2.09550674429585e-05	0.0127367893174935	1.84492151148942	0.653370270312789	0.372080403785958	-0.281289866526832	5	399787	F	I	AHRR	Body	opensea	Body-opensea		TRUE	TRUE				High-ICI hypermethylated probes
cg01393939	-0.349873630865164	0.498537766932169	-4.67495411277592	2.11664078291993e-05	0.0127367893174935	1.835144704212	0.742789169611623	0.392915538746459	-0.349873630865164	1	87803705	F	I	LMO4	Body	shelf	Body-shelf	chr1:87800835-87801252	NA	TRUE				High-ICI hypermethylated probes
cg25814752	-0.151954342445875	0.441113190421269	-4.67472148190853	2.11832958219747e-05	0.0127367893174935	1.83436768493931	0.54719452382688	0.395240181381005	-0.151954342445875	12	56106386	F	II	ITGA7	TSS1500	shelf	TSS1500-shelf	chr12:56109798-56110298	NA	NA				High-ICI hypermethylated probes
cg16773028	-0.189625467972376	0.621536560722215	-4.6741649061415	2.12237543681326e-05	0.0127367893174935	1.83250870863076	0.753916604401044	0.564291136428667	-0.189625467972376	1	111148339	R	II	KCNA2	5'UTR	shore	5'UTR-shore	chr1:111148983-111150186	NA	NA				High-ICI hypermethylated probes
cg17652291	-0.184800748838241	0.320364074993735	-4.67413751769291	2.12257472381589e-05	0.0127367893174935	1.83241723288165	0.449375918522318	0.264575169684077	-0.184800748838241	11	60500967	R	II		IGR	opensea	IGR-opensea		NA	NA				High-ICI hypermethylated probes
cg05618222	-0.246553889436425	0.41734303900821	-4.67337269717508	2.12814720456134e-05	0.0127367893174935	1.82986286691358	0.589465565595903	0.342911676159478	-0.246553889436425	3	133174926	R	II	BFSP2	Body	opensea	Body-opensea		NA	NA				High-ICI hypermethylated probes
cg02873528	-0.121238463661332	0.654469798907632	-4.67286746327009	2.13183619120814e-05	0.0127367893174935	1.82817556772722	0.739107971652335	0.617869507991003	-0.121238463661332	1	20691954	R	II		IGR	shore	IGR-shore	chr1:20692582-20693534	NA	NA				High-ICI hypermethylated probes
cg25372239	-0.188022758814366	0.69788544808474	-4.67151327840545	2.14175473500414e-05	0.0127367893174935	1.82365344402271	0.829146619332504	0.641123860518139	-0.188022758814365	1	3130550	F	I	PRDM16	Body	opensea	Body-opensea		NA	NA				High-ICI hypermethylated probes
cg11615959	-0.311680208438273	0.654786294608751	-4.67128933730767	2.14339930885527e-05	0.0127367893174935	1.82290567329717	0.872374364650564	0.560694156212291	-0.311680208438273	19	7834128	R	II	CLEC4M	3'UTR	opensea	3'UTR-opensea		NA	NA				High-ICI hypermethylated probes
cg02297043	0.226656122283593	0.584172357300911	4.67058192463284	2.14860251627965e-05	0.0127367893174935	1.82054361897248	0.425940724763308	0.652596847046901	0.226656122283593	1	75590912	R	II		IGR	island	IGR-island	chr1:75590817-75591354	NA	NA				Low-ICI hypermethylated probes
cg01278291	-0.240192482948335	0.60634351448524	-4.67009248924506	2.15220967843446e-05	0.0127367893174935	1.8189094770443	0.774025059185021	0.533832576236686	-0.240192482948335	5	176937363	F	II	DOK3	1stExon	opensea	1stExon-opensea		NA	NA	low-CpG:176869943-176870034			High-ICI hypermethylated probes
cg26169070	-0.157639586640568	0.610791127473493	-4.66689715428934	2.17590557681162e-05	0.0128584402200484	1.80824250805789	0.72084140493955	0.563201818298982	-0.157639586640568	14	24554083	R	II	NRL	TSS1500	shelf	TSS1500-shelf	chr14:24550317-24551148	NA	NA				High-ICI hypermethylated probes
cg07370221	-0.163299436424402	0.191175259814393	-4.66308588025159	2.20450328514836e-05	0.0129368362013542	1.79552324520292	0.305176753167277	0.141877316742875	-0.163299436424402	12	132904796	R	II	GALNT9	Body	shore	Body-shore	chr12:132905449-132906206	NA	TRUE				High-ICI hypermethylated probes
cg03155027	-0.228928035105436	0.446606219922425	-4.66305237470754	2.20475631666034e-05	0.0129368362013542	1.79541144684828	0.606423904807352	0.377495869701917	-0.228928035105436	3	49907692	F	II	CAMKV	TSS1500	shore	TSS1500-shore	chr3:49906737-49907482	TRUE	NA				High-ICI hypermethylated probes
cg24195796	-0.276699881859792	0.385537286407634	-4.66275117214839	2.20703225411444e-05	0.0129368362013542	1.79440643534597	0.578705128460696	0.302005246600904	-0.276699881859792	15	29362669	R	II	APBA2	Body	opensea	Body-opensea		NA	NA				High-ICI hypermethylated probes
cg26333041	-0.236885321713247	0.634415264365028	-4.66240946707913	2.2096170199384e-05	0.0129368362013542	1.79326631269888	0.799788036127106	0.562902714413859	-0.236885321713247	17	941382	F	I	ABR	Body	opensea	Body-opensea		NA	NA		rs79392236		High-ICI hypermethylated probes
cg12112719	-0.168951577329063	0.69817393380268	-4.66218922217835	2.21128459266273e-05	0.0129368362013542	1.79253146840485	0.816121261372026	0.647169684042962	-0.168951577329063	6	32035439	R	II	TNXB	Body	opensea	Body-opensea		NA	NA		rs9469080		High-ICI hypermethylated probes
cg06520307	-0.264064908744396	0.521439475275409	-4.66102034780018	2.22015530280682e-05	0.0129375738891846	1.78863177129899	0.70578667571961	0.441721766975214	-0.264064908744396	7	149417640	F	II	KRBA1	Body	shore	Body-shore	chr7:149416662-149416974	NA	NA				High-ICI hypermethylated probes
cg25397111	-0.253371171242366	0.512197993449993	-4.66072872886006	2.22237385315465e-05	0.0129375738891846	1.78765890990617	0.689079754505984	0.435708583263618	-0.253371171242366	17	2592953	R	II	KIAA0664	3'UTR	shore	3'UTR-shore	chr17:2593028-2594044	NA	NA				High-ICI hypermethylated probes
cg21173532	-0.161378585262572	0.380307222958135	-4.66000083601181	2.22792091853777e-05	0.0129375738891846	1.78523071646088	0.492967744745214	0.331589159482642	-0.161378585262572	1	7701604	F	II	CAMTA1	Body	opensea	Body-opensea		NA	NA				High-ICI hypermethylated probes
cg09728120	-0.267751720510187	0.563056030980808	-4.65931047590798	2.23319447875585e-05	0.0129375738891846	1.78292787255367	0.749977043412448	0.482225322902261	-0.267751720510187	10	73300441	F	II	CDH23	Body	opensea	Body-opensea		NA	TRUE				High-ICI hypermethylated probes
cg14613361	-0.139694122903652	0.761424111459264	-4.6578757851847	2.24419298268631e-05	0.0129766121073584	1.77814260082102	0.858946423675021	0.719252300771369	-0.139694122903651	1	109751302	R	II		IGR	opensea	IGR-opensea		NA	TRUE				High-ICI hypermethylated probes
cg03670369	-0.385477183490272	0.514214470308542	-4.65742031600026	2.24769573677828e-05	0.0129766121073584	1.7766235536234	0.783321183311185	0.397843999820912	-0.385477183490272	6	170239250	R	I		IGR	island	IGR-island	chr6:170239046-170239297	NA	NA				High-ICI hypermethylated probes
cg18081375	-0.209132240854967	0.57224338594989	-4.65648584911982	2.25489894952518e-05	0.0129766121073584	1.77350717899619	0.718241365414679	0.509109124559711	-0.209132240854967	11	2323938	R	I	TSPAN32	Body	opensea	Body-opensea		TRUE	NA				High-ICI hypermethylated probes
cg11658060	-0.29525001645414	0.611622446626762	-4.65646092971419	2.25509134639692e-05	0.0129766121073584	1.77342407821373	0.817740382641916	0.522490366187777	-0.29525001645414	12	106514420	R	II	NUAK1	Body	opensea	Body-opensea		NA	TRUE				High-ICI hypermethylated probes
cg01157470	-0.190174839547996	0.683736566971097	-4.65400116293283	2.27416190838879e-05	0.0129790282970028	1.76522218889333	0.816500134202717	0.626325294654721	-0.190174839547996	6	170562328	F	II		IGR	shelf	IGR-shelf	chr6:170564873-170565152	NA	NA		rs71779657		High-ICI hypermethylated probes
cg12400702	-0.201620067931262	0.588764546318623	-4.65306500554451	2.28146132582695e-05	0.012994683322957	1.76210111591289	0.729518178647995	0.527898110716733	-0.201620067931262	3	12838781	F	II	CAND2	Body	island	Body-island	chr3:12838471-12838782	NA	NA				High-ICI hypermethylated probes
cg01132785	-0.223362457840311	0.72531282738056	-4.6520094531451	2.28971919740408e-05	0.0130171700556556	1.75858229842648	0.881245109269079	0.657882651428768	-0.223362457840311	4	528175	F	I	PIGG	Body	shore	Body-shore	chr4:529166-529556	NA	NA		rs35726502		High-ICI hypermethylated probes
cg01406145	-0.181014718691225	0.57340772452454	-4.65174833763392	2.29176648372207e-05	0.0130171700556556	1.75771188735016	0.699776490403319	0.518761771712095	-0.181014718691225	16	31494483	F	II	SLC5A2	1stExon	opensea	1stExon-opensea		NA	NA				High-ICI hypermethylated probes
cg09246103	0.18066124593469	0.273139289949045	4.65064419885983	2.30044334947782e-05	0.0130392636088604	1.7540315362729	0.14701728807011	0.327678534004801	0.18066124593469	1	8456466	R	II	RERE	5'UTR	opensea	5'UTR-opensea		NA	TRUE				Low-ICI hypermethylated probes
cg03210340	-0.237984195057407	0.268747151930107	-4.64963627596312	2.30839216958722e-05	0.0130392636088604	1.75067220816875	0.434887061687165	0.196902866629758	-0.237984195057407	14	21537527	F	II	FLJ10357	TSS1500	shore	TSS1500-shore	chr14:21538006-21538665	NA	NA				High-ICI hypermethylated probes
cg15622912	-0.114048573236749	0.192874760504537	-4.64835138007533	2.31856427637532e-05	0.0130786825598743	1.74639018434232	0.272493575783022	0.158445002546273	-0.114048573236749	5	175225021	F	II	CPLX2	5'UTR	shore	5'UTR-shore	chr5:175223609-175224679	TRUE	TRUE				High-ICI hypermethylated probes
cg05891007	-0.181521443908506	0.259032541337621	-4.64695738965195	2.32964966355813e-05	0.0131051113752514	1.74174514375279	0.385755058783182	0.204233614874676	-0.181521443908506	19	4280361	R	I	SHD	Body	shore	Body-shore	chr19:4279042-4279809	TRUE	NA				High-ICI hypermethylated probes
cg16105117	-0.224396268659909	0.267013630956158	-4.64626369941765	2.33518538639738e-05	0.0131182322434811	1.73943384968727	0.423667629831944	0.199271361172035	-0.224396268659909	14	21537336	F	I	FLJ10357	TSS1500	island	TSS1500-island	chr14:21537082-21537355	NA	NA				High-ICI hypermethylated probes
cg06099014	-0.251945752166271	0.404357929358772	-4.6424587187061	2.36577926367496e-05	0.0132356300373737	1.72675862794046	0.580244586531452	0.328298834365181	-0.251945752166271	21	43786627	R	II	TFF1	1stExon	opensea	1stExon-opensea		NA	NA				High-ICI hypermethylated probes
cg01549977	-0.182686150808923	0.733487156665206	-4.64134301540519	2.37482418429445e-05	0.0132362491273811	1.72304278737685	0.86102277138087	0.678336620571946	-0.182686150808923	14	65743867	R	II		IGR	shelf	IGR-shelf	chr14:65746329-65746972	TRUE	TRUE				High-ICI hypermethylated probes
cg26687579	-0.128898911986916	0.308537967863227	-4.64114375150378	2.37644315907036e-05	0.0132362491273811	1.7223791793452	0.398524000759753	0.269625088772837	-0.128898911986916	1	2243111	F	II		IGR	shelf	IGR-shelf	chr1:2245714-2247086	NA	TRUE		rs61762077		High-ICI hypermethylated probes
cg16768937	-0.264765945718915	0.672475900199914	-4.64004045269232	2.3854267799255e-05	0.0132362491273811	1.71870507884079	0.857312503815006	0.592546558096091	-0.264765945718915	17	27299936	F	II	SEZ6	Body	opensea	Body-opensea		NA	TRUE				High-ICI hypermethylated probes
cg17284168	-0.122590864609895	0.137625809823291	-4.63931158287415	2.39137982880797e-05	0.0132362491273811	1.71627806364424	0.223208111532086	0.100617246922191	-0.122590864609895	6	134491531	R	II	SGK1	Body	opensea	Body-opensea		NA	NA				High-ICI hypermethylated probes
cg00584594	-0.239922230781774	0.620014460375973	-4.63877110660979	2.3958035563651e-05	0.0132362491273811	1.71447846917667	0.787507338468909	0.547585107687135	-0.239922230781774	16	84951560	R	II		IGR	opensea	IGR-opensea		NA	NA				High-ICI hypermethylated probes
cg08126223	-0.188925405188834	0.625531799477865	-4.63857807875278	2.39738540392169e-05	0.0132362491273811	1.71383577576623	0.757423120081391	0.568497714892557	-0.188925405188834	12	49251284	R	II	RND1	3'UTR	opensea	3'UTR-opensea		NA	NA				High-ICI hypermethylated probes
cg01813877	-0.379226284025522	0.625775210205682	-4.63783450742774	2.40348846693866e-05	0.0132362491273811	1.71136013059609	0.890518087732933	0.511291803707411	-0.379226284025522	14	103369717	R	I	TRAF3	Body	opensea	Body-opensea		NA	NA				High-ICI hypermethylated probes
cg04786667	0.229276719423906	0.39958349900936	4.6377284689019	2.40436004451797e-05	0.0132362491273811	1.71100709944417	0.239522392996444	0.46879911242035	0.229276719423906	1	44509064	F	II		IGR	opensea	IGR-opensea		NA	NA				Low-ICI hypermethylated probes
cg16873863	-0.280807066489826	0.474857683279604	-4.63771377328944	2.40448085865882e-05	0.0132362491273811	1.71095817400807	0.670892805168728	0.390085738678902	-0.280807066489826	11	2921176	F	II	SLC22A18AS	5'UTR	shelf	5'UTR-shelf	chr11:2923301-2923817	NA	NA		rs35163699		High-ICI hypermethylated probes
cg05724065	-0.130365203604665	0.546269673125167	-4.63759873016647	2.40542684529035e-05	0.0132362491273811	1.71057516836732	0.63727934356616	0.506914139961495	-0.130365203604665	7	56160528	F	II	PHKG1	1stExon	opensea	1stExon-opensea		TRUE	NA				High-ICI hypermethylated probes
cg05005217	-0.107579810208653	0.142975918455449	-4.63746113299194	2.40655876961791e-05	0.0132362491273811	1.71011708012969	0.218078804827528	0.110498994618875	-0.107579810208653	8	25317638	F	II	CDCA2	5'UTR	shore	5'UTR-shore	chr8:25315286-25317028	NA	NA				High-ICI hypermethylated probes
cg15726814	-0.193831103620296	0.663420572343787	-4.63729731293485	2.40790709256529e-05	0.0132362491273811	1.70957169804072	0.798736625814561	0.604905522194264	-0.193831103620297	5	178594990	R	II	ADAMTS2	Body	shore	Body-shore	chr5:178593903-178594656	TRUE	NA				High-ICI hypermethylated probes
cg10758466	-0.228235981941344	0.577475856811539	-4.63352586441073	2.43915323845167e-05	0.013301154523603	1.69701816848407	0.736810410242288	0.508574428300944	-0.228235981941344	17	41974087	R	II	MPP2	Body	shelf	Body-shelf	chr17:41977922-41978130	NA	NA				High-ICI hypermethylated probes
cg12348511	-0.251874258170605	0.614481756528503	-4.63323109541438	2.44161202315568e-05	0.013301154523603	1.6960371871929	0.790318502798548	0.538444244627942	-0.251874258170605	11	3187678	F	II	OSBPL5	TSS1500	shore	TSS1500-shore	chr11:3186131-3186768	NA	NA				High-ICI hypermethylated probes
cg23112425	-0.2643165905154	0.558586351945875	-4.63182605398151	2.45336539785832e-05	0.013301154523603	1.69136161143432	0.743109254758513	0.478792664243113	-0.2643165905154	7	547637	F	II	PDGFA	Body	shelf	Body-shelf	chr7:550450-550681	NA	NA				High-ICI hypermethylated probes
cg07850274	0.153421103331608	0.761240016129205	4.63003434719318	2.46843361299118e-05	0.013301154523603	1.68540017548578	0.65413471757695	0.807555820908559	0.153421103331608	4	110748770	F	II	RRH	TSS1500	opensea	TSS1500-opensea		NA	NA			rs80227333	Low-ICI hypermethylated probes
cg15246825	-0.256059367091235	0.602002202658776	-4.62868456840653	2.47984498662153e-05	0.0133261594290574	1.68090977031692	0.780760628741337	0.524701261650101	-0.256059367091235	6	30956796	F	II	MUC21	3'UTR	opensea	3'UTR-opensea		NA	NA				High-ICI hypermethylated probes
cg00796821	-0.168966867193122	0.52203027804744	-4.62831605638483	2.48296943966712e-05	0.0133261594290574	1.67968390941547	0.639988279672827	0.471021412479704	-0.168966867193122	7	128551757	R	II	KCP	TSS1500	shore	TSS1500-shore	chr7:128550409-128550903	NA	NA				High-ICI hypermethylated probes
cg23982607	-0.140181541645233	0.271689987527092	-4.62780707805425	2.48729117944048e-05	0.0133261594290574	1.67799085170053	0.369552573203952	0.22937103155872	-0.140181541645233	1	1823379	R	II	GNB1	TSS1500	shore	TSS1500-shore	chr1:1821405-1823272	NA	NA				High-ICI hypermethylated probes
cg09469984	0.138818243030948	0.466530269600968	4.62756558679755	2.48934425731918e-05	0.0133261594290574	1.67718758588551	0.369619420692571	0.508437663723519	0.138818243030948	1	9796095	R	II	CLSTN1	Body	opensea	Body-opensea		NA	NA				Low-ICI hypermethylated probes
cg09782903	-0.223434743431472	0.612405441247839	-4.62554331402111	2.50660214314238e-05	0.0134010280583881	1.67046163716111	0.768388186662263	0.544953443230791	-0.223434743431472	7	150745680	F	II	ACCN3	1stExon	shore	1stExon-shore	chr7:150746002-150746381	NA	NA				High-ICI hypermethylated probes
cg02117271	0.139163829901739	0.599906152766415	4.62419062671178	2.51821112353429e-05	0.0134234231270824	1.66596336739334	0.502754045099164	0.641917875000902	0.139163829901739	5	10618513	F	II	ANKRD33B	Body	opensea	Body-opensea		NA	NA				Low-ICI hypermethylated probes
cg19896590	-0.27189556020249	0.315616839459233	-4.6231832694365	2.52689057983928e-05	0.0134234231270824	1.66261382407953	0.505430721110028	0.233535160907538	-0.27189556020249	1	3182933	F	I	PRDM16	Body	island	Body-island	chr1:3182821-3183216	NA	NA				High-ICI hypermethylated probes
cg05526015	-0.174593025503689	0.393664735184613	-4.62314775301499	2.52719712514251e-05	0.0134234231270824	1.66249573467566	0.515550432234358	0.340957406730669	-0.174593025503689	6	170553845	F	I		IGR	opensea	IGR-opensea		TRUE	TRUE		rs35783931		High-ICI hypermethylated probes
cg02387843	-0.240632997350672	0.691774296658641	-4.62277022971603	2.53045781076357e-05	0.0134234231270824	1.66124052167453	0.859763370280808	0.619130372930137	-0.240632997350672	4	9892887	F	II	SLC2A9	Body	opensea	Body-opensea		NA	NA				High-ICI hypermethylated probes
cg03932904	-0.32627278486986	0.521399217187532	-4.61967838698124	2.55731752286221e-05	0.0135133937531312	1.6509621735813	0.749174557568377	0.422901772698517	-0.32627278486986	7	4707887	R	I		IGR	opensea	IGR-opensea		NA	TRUE				High-ICI hypermethylated probes
cg06660160	-0.146713946899893	0.403246799695865	-4.61843873909783	2.56816484550188e-05	0.0135485506343606	1.64684196120001	0.505669743758054	0.358955796858161	-0.146713946899893	5	139018890	F	II		IGR	shore	IGR-shore	chr5:139017133-139017668	NA	TRUE				High-ICI hypermethylated probes
cg23114262	-0.175936634808987	0.756673194205856	-4.61806125952415	2.57147684465452e-05	0.0135485506343606	1.64558742535676	0.879496882657413	0.703560247848426	-0.175936634808987	10	135086817	R	I	ADAM8	Body	shelf	Body-shelf	chr10:135089969-135090491	NA	NA				High-ICI hypermethylated probes
cg01721754	-0.121922492245439	0.331000484755468	-4.61685508499471	2.58208782798805e-05	0.0135485506343606	1.64157904646576	0.416116186889076	0.294193694643637	-0.121922492245439	16	616935	R	II	NHLRC4	TSS200	shore	TSS200-shore	chr16:614792-615095	NA	TRUE				High-ICI hypermethylated probes
cg27320005	0.241995189534606	0.742787444474285	4.61483407801042	2.59996315083834e-05	0.0135485506343606	1.6348637808434	0.573847406497296	0.815842596031902	0.241995189534606	5	140683767	F	I	SLC25A2	TSS200	island	TSS200-island	chr5:140683195-140683773	NA	NA				Low-ICI hypermethylated probes
cg22233020	-0.245525604061894	0.599160154122084	-4.61357062122933	2.61119955239559e-05	0.0135485506343606	1.63066627455916	0.770564821108689	0.525039217046795	-0.245525604061893	19	1926143	F	II		IGR	shore	IGR-shore	chr19:1924512-1924775	NA	NA				High-ICI hypermethylated probes
cg12491966	-0.192121857631525	0.582931304566362	-4.61353883462422	2.61148285440882e-05	0.0135485506343606	1.63056067801887	0.717054110837426	0.524932253205901	-0.192121857631525	21	46925242	R	II	COL18A1	Body	shelf	Body-shelf	chr21:46929225-46930211	NA	NA				High-ICI hypermethylated probes
cg23617042	-0.211749443317445	0.466713266481568	-4.61302194486098	2.61609391931398e-05	0.0135485506343606	1.62884358943309	0.614538349552237	0.402788906234792	-0.211749443317445	4	174158959	F	II	GALNT7	Body	opensea	Body-opensea		NA	TRUE		rs74655288		High-ICI hypermethylated probes
cg00730887	0.259084594955377	0.544943727192627	4.61234355903225	2.6221577425764e-05	0.0135485506343606	1.62659013872631	0.36407334958227	0.623157944537646	0.259084594955377	4	160149604	F	II		IGR	opensea	IGR-opensea		NA	TRUE				Low-ICI hypermethylated probes
cg14178348	-0.235322065729526	0.579561497382474	-4.61175262464596	2.62745107361751e-05	0.0135485506343606	1.62462729547467	0.743842939495539	0.508520873766014	-0.235322065729526	9	109939375	F	II		IGR	opensea	IGR-opensea		NA	TRUE		rs68006103		High-ICI hypermethylated probes
cg00621779	-0.166898352673437	0.245962008007385	-4.61174056539656	2.62755920382931e-05	0.0135485506343606	1.62458724065475	0.362475952326576	0.19557759965314	-0.166898352673437	8	27487459	F	II		IGR	shelf	IGR-shelf	chr8:27490959-27491775	NA	NA		rs61166655		High-ICI hypermethylated probes
cg04029933	0.254642916191152	0.488353491574181	4.61156657699779	2.62911976903431e-05	0.0135485506343606	1.6240093427219	0.310583908572811	0.565226824763963	0.254642916191152	20	31068427	F	II	C20orf112	5'UTR	shore	5'UTR-shore	chr20:31070189-31072676	NA	NA		rs55829681		Low-ICI hypermethylated probes
cg14952449	-0.155845795291558	0.44333570449296	-4.61075569713785	2.63640481119165e-05	0.0135485506343606	1.62131614647179	0.552133712526689	0.396287917235131	-0.155845795291558	5	1154998	F	II		IGR	shore	IGR-shore	chr5:1155223-1156466	NA	NA		rs78424203		High-ICI hypermethylated probes
cg19382175	-0.128771192771771	0.711820883255037	-4.61038796082446	2.63971510206011e-05	0.0135485506343606	1.62009483952697	0.801717753680613	0.672946560908842	-0.128771192771771	5	149324712	F	II	PDE6A	TSS1500	opensea	TSS1500-opensea		NA	NA				High-ICI hypermethylated probes
cg20174000	-0.106404472096761	0.176660216826715	-4.61020295048585	2.64138206596352e-05	0.0135485506343606	1.61948040808237	0.250942584139548	0.144538112042787	-0.106404472096761	9	133710056	R	II	ABL1	TSS1500	shore	TSS1500-shore	chr9:133710260-133711285	NA	NA				High-ICI hypermethylated probes
cg15653828	-0.147205539371388	0.36222703023369	-4.61017794394954	2.64160745663131e-05	0.0135485506343606	1.61939736052857	0.464993161492961	0.317787622121573	-0.147205539371388	6	34513187	F	II	SPDEF	5'UTR	shore	5'UTR-shore	chr6:34512063-34512266	NA	NA				High-ICI hypermethylated probes
cg11076668	-0.24687274589567	0.5142055878166	-4.60975726345281	2.64540198482331e-05	0.0135485506343606	1.61800029456573	0.686550712309804	0.439677966414133	-0.246872745895671	15	82336109	R	II	MEX3B	Body	island	Body-island	chr15:82335472-82339937	NA	NA				High-ICI hypermethylated probes
cg09984096	-0.120572718155363	0.271408601540408	-4.60961519430781	2.6466846489476e-05	0.0135485506343606	1.61752849968287	0.355582008554529	0.235009290399167	-0.120572718155363	8	17195444	R	II	MTMR7	Body	opensea	Body-opensea		NA	TRUE				High-ICI hypermethylated probes
cg24441220	-0.248306178480181	0.528928133538582	-4.60924660823115	2.65001524662846e-05	0.0135485506343606	1.61630449710118	0.702273956251161	0.453967777770981	-0.248306178480181	1	53992420	R	II	GLIS1	Body	opensea	Body-opensea		NA	TRUE				High-ICI hypermethylated probes
cg16533530	0.229240280606125	0.603472969080826	4.60900237049206	2.65222447227664e-05	0.0135485506343606	1.61549345366313	0.443437301487871	0.672677582093996	0.229240280606124	3	119963851	R	II	GPR156	TSS1500	opensea	TSS1500-opensea		NA	NA				Low-ICI hypermethylated probes
cg26881591	-0.166795261238486	0.629392300947104	-4.60888396390536	2.65329615427523e-05	0.0135485506343606	1.61510026583455	0.745834275773971	0.579039014535486	-0.166795261238486	2	3990813	R	I		IGR	opensea	IGR-opensea		NA	NA				High-ICI hypermethylated probes
cg11809272	-0.237799797647452	0.556207707032712	-4.60810623124416	2.6603458417464e-05	0.0135650901684516	1.61251778627626	0.722218886522442	0.48441908887499	-0.237799797647452	6	31409361	R	II		IGR	opensea	IGR-opensea		TRUE	NA				High-ICI hypermethylated probes
cg13508402	-0.335379099359311	0.618374979264286	-4.60682782514125	2.67197366248768e-05	0.0135650901684516	1.60827320477499	0.852507558062296	0.517128458702985	-0.335379099359311	7	127670570	R	I	SND1	Body	shore	Body-shore	chr7:127671158-127672853	TRUE	NA				High-ICI hypermethylated probes
cg06940168	-0.168974242630653	0.561315344066589	-4.60533268213847	2.68563589530279e-05	0.0135650901684516	1.60330963554133	0.679278494582328	0.510304251951675	-0.168974242630653	17	64370665	R	II	PRKCA	Body	opensea	Body-opensea		NA	TRUE				High-ICI hypermethylated probes
cg02237208	-0.170499412772187	0.385703977859091	-4.6049346566646	2.68928444946737e-05	0.0135650901684516	1.60198838595971	0.504731869794391	0.334232457022204	-0.170499412772187	1	2250525	F	I		IGR	shore	IGR-shore	chr1:2249315-2249634	NA	NA				High-ICI hypermethylated probes
cg08168529	0.216763644272369	0.499815647164999	4.60474351728212	2.69103827684018e-05	0.0135650901684516	1.6013539138404	0.348490084182402	0.565253728454771	0.216763644272369	1	216807474	R	II	ESRRG	Body	opensea	Body-opensea		NA	TRUE				Low-ICI hypermethylated probes
cg27529555	-0.235129391460902	0.433584035520678	-4.6044409050015	2.69381722767433e-05	0.0135650901684516	1.60034943876782	0.597730969182062	0.36260157772116	-0.235129391460902	1	205325859	R	II	KLHDC8A	5'UTR	opensea	5'UTR-opensea		NA	NA				High-ICI hypermethylated probes
cg08038402	-0.204400761767073	0.444679614791724	-4.60433866917188	2.69475671442817e-05	0.0135650901684516	1.60001008885196	0.587374486214021	0.382973724446947	-0.204400761767073	8	1496052	R	II	DLGAP2	5'UTR	shore	5'UTR-shore	chr8:1496731-1497884	NA	NA				High-ICI hypermethylated probes
cg01259156	0.16189793944615	0.736698336411549	4.60378205514731	2.69987729190096e-05	0.0135665024275219	1.59816258330129	0.623675246609519	0.78557318605567	0.161897939446151	1	75594592	R	II	LHX8	5'UTR	shore	5'UTR-shore	chr1:75595813-75596162	NA	NA				Low-ICI hypermethylated probes
cg07356745	0.291024766126523	0.559015205791872	4.6023570321015	2.71303021334141e-05	0.0136058594641556	1.59343309301722	0.35584697283562	0.646871738962144	0.291024766126523	10	86259688	F	II	FAM190B	Body	opensea	Body-opensea		NA	TRUE				Low-ICI hypermethylated probes
cg15124820	-0.259628935843943	0.459426138433174	-4.60216815808305	2.71477821137695e-05	0.0136058594641556	1.59280628756742	0.640676527607247	0.381047591763304	-0.259628935843943	3	126703827	R	I		IGR	shore	IGR-shore	chr3:126701372-126703284	NA	TRUE				High-ICI hypermethylated probes
cg14114133	0.173669426814786	0.738708013749838	4.60115594134254	2.72416489529052e-05	0.0136138767067293	1.58944728527112	0.617467093143289	0.791136519958075	0.173669426814786	6	10839408	F	II		IGR	shore	IGR-shore	chr6:10838098-10838915	NA	NA				Low-ICI hypermethylated probes
cg21158737	-0.103434734505373	0.806259481702387	-4.60096632820869	2.72592677864605e-05	0.0136138767067293	1.58881809583704	0.878468635979724	0.77503390147435	-0.103434734505373	9	140343617	R	I	NELF	3'UTR	island	3'UTR-island	chr9:140343603-140343955	NA	NA				High-ICI hypermethylated probes
cg19137417	-0.214096855527022	0.35585095517374	-4.59964296766122	2.73825449803904e-05	0.0136587869861624	1.58442711809897	0.505314797711472	0.291217942184451	-0.214096855527022	17	79362935	F	II		IGR	shore	IGR-shore	chr17:79360383-79361723	NA	NA				High-ICI hypermethylated probes
cg18792381	-0.174120754957405	0.675258292167204	-4.59845691298714	2.74934946466885e-05	0.0136795967545131	1.5804921786607	0.796814290911053	0.622693535953648	-0.174120754957405	5	179781547	R	II	GFPT2	TSS1500	shore	TSS1500-shore	chr5:179779114-179781279	NA	NA				High-ICI hypermethylated probes
cg06061621	0.174982979812747	0.748966323905139	4.59691090180109	2.76387766688284e-05	0.0137031448596593	1.57536366155056	0.626808394601901	0.801791374414648	0.174982979812747	2	164521785	F	II	FIGN	Body	opensea	Body-opensea		NA	TRUE				Low-ICI hypermethylated probes
cg05586209	-0.166085446613825	0.195344441386414	-4.59595726101331	2.77287664238876e-05	0.0137145541044794	1.57220055081249	0.311290885248896	0.145205438635071	-0.166085446613825	7	143079085	R	II	ZYX	Body	island	Body-island	chr7:143077469-143079169	NA	NA		rs77691256		High-ICI hypermethylated probes
cg07087859	-0.242575170868605	0.345948222317445	-4.59470781296071	2.7847103558809e-05	0.0137564691580517	1.56805670073562	0.51529315292383	0.272717982055225	-0.242575170868605	20	62102803	R	II	KCNQ2	Body	island	Body-island	chr20:62102541-62103995	NA	NA				High-ICI hypermethylated probes
cg20656566	-0.191044904736789	0.682578977663056	-4.59336848603297	2.79745016405208e-05	0.0137873041397682	1.56361528953447	0.815949948894399	0.624905044157611	-0.191044904736789	7	1468370	R	II		IGR	opensea	IGR-opensea		NA	NA				High-ICI hypermethylated probes
cg17677988	-0.22544430108003	0.594144926833354	-4.59320253235521	2.79903269435698e-05	0.0137873041397682	1.5630649999007	0.751530570983563	0.526086269903533	-0.22544430108003	4	10687769	F	II	CLNK	TSS1500	opensea	TSS1500-opensea		NA	NA				High-ICI hypermethylated probes
cg16645828	-0.182025911031248	0.700024106442535	-4.59292775357538	2.80165490303746e-05	0.0137873041397682	1.56215387299053	0.827098799049255	0.645072888018007	-0.182025911031248	7	100483871	R	II	SRRT	Body	shore	Body-shore	chr7:100484425-100484651	NA	NA				High-ICI hypermethylated probes
cg19242529	-0.204510628376686	0.686702200614349	-4.59248221252341	2.80591179855892e-05	0.0137873041397682	1.56067657169973	0.829473771367885	0.624963142991199	-0.204510628376686	1	29454532	F	II		IGR	shelf	IGR-shelf	chr1:29447699-29451847	NA	NA				High-ICI hypermethylated probes
cg07044422	-0.155702254939766	0.359010621250319	-4.59198643074029	2.81065615051871e-05	0.0137873041397682	1.55903275577753	0.467708421868646	0.31200616692888	-0.155702254939766	22	42828516	F	II	NFAM1	TSS200	opensea	TSS200-opensea		NA	NA				High-ICI hypermethylated probes
cg10548399	-0.175560663281881	0.656546152005853	-4.59193464628687	2.81115215070752e-05	0.0137873041397682	1.55886106336049	0.779107369768675	0.603546706486794	-0.175560663281881	8	143009151	R	II		IGR	opensea	IGR-opensea		NA	NA				High-ICI hypermethylated probes
cg25325322	-0.264622668551077	0.367932772689755	-4.59124451893148	2.81777048240024e-05	0.013803232949467	1.55657300979176	0.552669352621639	0.288046684070562	-0.264622668551077	2	85073715	F	II	C2orf89	Body	opensea	Body-opensea		NA	TRUE		rs79927944		High-ICI hypermethylated probes
cg22546130	-0.1602608570548	0.362747988345581	-4.59066717544229	2.82331891688801e-05	0.0138090858854601	1.55465899198248	0.474628209308365	0.314367352253566	-0.1602608570548	22	19950026	R	II	COMT	5'UTR	opensea	5'UTR-opensea		NA	TRUE			rs72563160	High-ICI hypermethylated probes
cg17228232	-0.260508847904661	0.469830901643622	-4.59041307418955	2.8257642859297e-05	0.0138090858854601	1.55381662382251	0.651695569048763	0.391186721144102	-0.260508847904661	17	79026049	F	I	BAIAP2	Body	island	Body-island	chr17:79026043-79026355	NA	NA				High-ICI hypermethylated probes
cg06067477	-0.240030940319109	0.374595207572418	-4.58971912161417	2.83245316384955e-05	0.0138090858854601	1.55151620965189	0.542163977229154	0.302133036910045	-0.240030940319109	2	168844818	F	II	STK39	Body	opensea	Body-opensea		NA	TRUE		rs58570538		High-ICI hypermethylated probes
cg10682560	-0.176145148358225	0.652138899981139	-4.58733056301253	2.85559458273243e-05	0.0138627885859064	1.54359939155655	0.775108154495372	0.598963006137147	-0.176145148358225	11	31845148	R	II		IGR	shore	IGR-shore	chr11:31847132-31847958	NA	NA				High-ICI hypermethylated probes
cg01776691	-0.172636011347665	0.457344777083582	-4.58709834259975	2.8578542720697e-05	0.0138627885859064	1.54282979546919	0.57786425670365	0.405228245355985	-0.172636011347664	7	44279727	R	I	CAMK2B	Body	shore	Body-shore	chr7:44279048-44279327	NA	NA				High-ICI hypermethylated probes
cg04820679	-0.292979765623266	0.610426948786093	-4.58627968219496	2.86583444290815e-05	0.0138627885859064	1.54011682382179	0.814959992711769	0.521980227088504	-0.292979765623266	6	33132163	R	I	COL11A2	Body	shelf	Body-shelf	chr6:33129291-33129718	NA	NA				High-ICI hypermethylated probes
cg03839199	-0.211654225808908	0.412869413830921	-4.5861435065445	2.86716397304755e-05	0.0138627885859064	1.53966556900393	0.560628024301291	0.348973798492382	-0.211654225808908	16	30823315	F	II		IGR	shelf	IGR-shelf	chr16:30825528-30825978	NA	NA				High-ICI hypermethylated probes
cg01793178	-0.226466059244356	0.652768912290836	-4.58526799658315	2.87572629382362e-05	0.0138877911109011	1.536764465219	0.810867859310481	0.584401800066125	-0.226466059244356	1	111102144	F	II		IGR	shelf	IGR-shelf	chr1:111098066-111098362	NA	NA				High-ICI hypermethylated probes
cg15355719	-0.270277931994453	0.525408910253203	-4.58438984771768	2.88433953284504e-05	0.0138959083111187	1.53385485203645	0.714093504287066	0.443815572292613	-0.270277931994453	11	64503521	F	II	RASGRP2	Body	opensea	Body-opensea		NA	NA		rs33956572		High-ICI hypermethylated probes
cg20815297	0.237864934771709	0.318741132334982	4.58367009203266	2.89141799078062e-05	0.0138959083111187	1.53147022617634	0.152684479758506	0.390549414530215	0.237864934771709	4	13541663	F	II		IGR	shore	IGR-shore	chr4:13543562-13546494	NA	NA				Low-ICI hypermethylated probes
cg17257720	0.108119938862992	0.762183274979195	4.58351786469768	2.89291724916459e-05	0.0138959083111187	1.53096590135952	0.686703317659748	0.79482325652274	0.108119938862992	8	17027613	F	II	ZDHHC2	Body	opensea	Body-opensea		NA	TRUE		rs34426012		Low-ICI hypermethylated probes
cg01419164	-0.309001344679969	0.449446188941546	-4.58348907955543	2.89320083404636e-05	0.0138959083111187	1.53087053780025	0.665164108812468	0.356162764132499	-0.309001344679969	10	131742167	R	I	EBF3	Body	opensea	Body-opensea		NA	NA				High-ICI hypermethylated probes
cg24160178	0.166443037415872	0.62241610691906	4.58302606129463	2.89776612417658e-05	0.0138959083111187	1.52933661908609	0.506220024194772	0.672663061610644	0.166443037415872	8	93161345	R	II		IGR	opensea	IGR-opensea		NA	TRUE				Low-ICI hypermethylated probes
cg05341539	0.253118767259185	0.562314112468519	4.57809070991004	2.94686765407841e-05	0.0140654886119361	1.51299052049486	0.385608557966824	0.638727325226009	0.253118767259185	15	86233214	R	II	AKAP13	Body	opensea	Body-opensea		NA	TRUE	low-CpG:84034147-84034259			Low-ICI hypermethylated probes
cg14126020	-0.212454963786821	0.32448455537775	-4.57676847617043	2.96016002873242e-05	0.0141056898490149	1.50861249113176	0.472802171606285	0.260347207819464	-0.212454963786821	20	61149009	R	I	C20orf166	5'UTR	shore	5'UTR-shore	chr20:61150437-61150646	NA	NA				High-ICI hypermethylated probes
cg07122905	-0.236574891195287	0.571565331553543	-4.57559086499211	2.97204784911794e-05	0.0141140090658821	1.50471377064805	0.736721387671008	0.500146496475721	-0.236574891195287	14	92333765	F	II	TC2N	1stExon	opensea	1stExon-opensea		NA	NA			rs74413945	High-ICI hypermethylated probes
cg12096707	-0.254413009024018	0.520677651852039	-4.5749833298058	2.97819906723902e-05	0.0141163188797468	1.5027025685886	0.698286733623523	0.443873724599505	-0.254413009024018	1	3073714	R	II	PRDM16	Body	shore	Body-shore	chr1:3071899-3072239	NA	NA				High-ICI hypermethylated probes
cg01533585	-0.187873053769955	0.563996350551751	-4.57452545034987	2.98284326188868e-05	0.0141219869325806	1.5011868660271	0.695153010730776	0.507279956960821	-0.187873053769955	6	33132086	R	II	COL11A2	Body	shelf	Body-shelf	chr6:33129291-33129718	NA	NA				High-ICI hypermethylated probes
cg16325482	-0.18153976651149	0.397303973143843	-4.57335750534559	2.99472161423529e-05	0.0141253104560715	1.49732094940943	0.524039281840543	0.342499515329053	-0.18153976651149	17	76989499	F	II	CANT1	3'UTR	shore	3'UTR-shore	chr17:76989642-76990039	TRUE	TRUE				High-ICI hypermethylated probes
cg10052597	-0.193036866517813	0.309263329403463	-4.57314366456311	2.99690144149705e-05	0.0141253104560715	1.49661317836769	0.444024915463069	0.250988048945255	-0.193036866517813	12	132903921	R	I	GALNT9	Body	shore	Body-shore	chr12:132905449-132906206	NA	NA				High-ICI hypermethylated probes
cg01336858	-0.140607652962202	0.302885854645623	-4.5731004645996	2.99734199692478e-05	0.0141253104560715	1.49647019666801	0.401045914260745	0.260438261298543	-0.140607652962202	15	70154572	R	II		IGR	opensea	IGR-opensea		NA	TRUE				High-ICI hypermethylated probes
cg22353828	-0.268280718748407	0.547461052976589	-4.57152168667008	3.01348595720065e-05	0.0141806076525903	1.49124520711186	0.734751366065099	0.466470647316692	-0.268280718748407	11	3187704	F	II	OSBPL5	TSS1500	shore	TSS1500-shore	chr11:3186131-3186768	NA	NA				High-ICI hypermethylated probes
cg08030922	0.167603319626423	0.796704905283364	4.57012015400343	3.02788866894191e-05	0.0142120555650433	1.48660745545625	0.679698814223409	0.847302133849831	0.167603319626423	4	90675036	R	II	SNCA	Body	opensea	Body-opensea		TRUE	TRUE			rs77795436	Low-ICI hypermethylated probes
cg26877594	-0.167592250054359	0.196147291677447	-4.56911994521382	3.0382083346105e-05	0.0142319449730911	1.48329807693125	0.313145654922943	0.145553404868584	-0.167592250054359	8	297359	F	II		IGR	opensea	IGR-opensea		NA	NA				High-ICI hypermethylated probes
cg03352717	-0.154666507196606	0.36233628072901	-4.56855502544565	3.04405208354406e-05	0.0142319449730911	1.48142906991079	0.47031101216815	0.315644504971544	-0.154666507196606	16	679927	R	II	WFIKKN1	TSS1500	shore	TSS1500-shore	chr16:677367-678128	NA	TRUE				High-ICI hypermethylated probes
cg26260995	-0.172857479563552	0.650471281375773	-4.56821946236373	3.04752847744512e-05	0.0142319449730911	1.48031892381256	0.771145370882404	0.598287891318852	-0.172857479563552	4	8268962	R	II		IGR	shelf	IGR-shelf	chr4:8271214-8272091	NA	NA				High-ICI hypermethylated probes
cg11524235	-0.184164055305429	0.288374455845809	-4.56731820868424	3.05688457665546e-05	0.0142319449730911	1.47733747052971	0.416941815209976	0.232777759904547	-0.184164055305429	1	33351587	F	I	HPCA	TSS1500	shore	TSS1500-shore	chr1:33351686-33352397	TRUE	NA				High-ICI hypermethylated probes
cg27220062	-0.239126462097221	0.370201988683753	-4.56719200766267	3.05819693409458e-05	0.0142319449730911	1.47692000266543	0.537139330147851	0.298012868050629	-0.239126462097221	15	38848671	R	II	RASGRP1	Body	opensea	Body-opensea		NA	TRUE				High-ICI hypermethylated probes
cg17360680	-0.240104625812306	0.482721378774452	-4.56492774036452	3.08183670931966e-05	0.0142770617672041	1.46943073248128	0.650341589247194	0.410236963434888	-0.240104625812306	12	53069734	F	II	KRT1	Body	opensea	Body-opensea		NA	NA			rs66514557	High-ICI hypermethylated probes
cg25416270	0.210926992525202	0.563155866024718	4.56368738013655	3.09486213720019e-05	0.0142991690207461	1.4653287985861	0.415904946714671	0.626831939239873	0.210926992525202	6	17505703	F	II	CAP2	Body	opensea	Body-opensea		NA	TRUE				Low-ICI hypermethylated probes
cg15662251	-0.213121382340598	0.425407160781712	-4.56365189530723	3.09523556550705e-05	0.0142991690207461	1.46521145545121	0.574190012604393	0.361068630263795	-0.213121382340598	1	26197855	F	II	PAQR7	TSS200	shelf	TSS200-shelf	chr1:26201722-26202516	NA	NA				High-ICI hypermethylated probes
cg09222367	0.211281438515512	0.408615657963143	4.56297761779976	3.10233976935477e-05	0.0142991690207461	1.46298179234914	0.261117295225899	0.472398733741411	0.211281438515512	15	90963532	F	II	IQGAP1	Body	opensea	Body-opensea		NA	TRUE		rs2601207		Low-ICI hypermethylated probes
cg22545356	-0.168958032093295	0.713908674732918	-4.56281391389664	3.10406696020357e-05	0.0142991690207461	1.46244048663237	0.831860508458425	0.662902476365131	-0.168958032093295	10	88716659	R	II	MMRN2	Body	opensea	Body-opensea		NA	NA				High-ICI hypermethylated probes
cg15146567	0.115956186660666	0.496477082076862	4.56193851563299	3.1133189860406e-05	0.0143256749559243	1.45954602245299	0.415526536672247	0.531482723332912	0.115956186660665	3	42948626	F	II	ZNF662	5'UTR	shore	5'UTR-shore	chr3:42947480-42948170	NA	NA				Low-ICI hypermethylated probes
cg14391240	-0.253106577745531	0.505465652004231	-4.56095715157487	3.12372299976172e-05	0.0143401609838312	1.45630146879685	0.682162696845451	0.42905611909992	-0.253106577745531	9	36802634	F	II		IGR	opensea	IGR-opensea		NA	TRUE				High-ICI hypermethylated probes
cg00031162	-0.15826392351588	0.556690934283591	-4.56010723725378	3.13276088749454e-05	0.0143440530533278	1.45349175056666	0.667177069568262	0.508913146052382	-0.15826392351588	17	7453377	R	II	TNFSF12	Body	shore	Body-shore	chr17:7452150-7452645	TRUE	TRUE				High-ICI hypermethylated probes
cg08102294	-0.265475233026364	0.53721663511147	-4.5597397606697	3.13667649820381e-05	0.0143440530533278	1.45227698476282	0.722548401563838	0.457073168537474	-0.265475233026364	3	13063918	F	II	IQSEC1	Body	opensea	Body-opensea		TRUE	TRUE	low-CpG:13038890-13039156			High-ICI hypermethylated probes
cg13496596	-0.143969246042665	0.273508611775915	-4.55912585047275	3.14322862978173e-05	0.0143440530533278	1.45024767760772	0.374015443918907	0.230046197876242	-0.143969246042665	9	137534945	R	II	COL5A1	Body	shore	Body-shore	chr9:137533359-137534397	NA	NA				High-ICI hypermethylated probes
cg16182479	-0.155236085348064	0.368312235953779	-4.5578361873018	3.15703651837893e-05	0.0143440530533278	1.4459850192428	0.476684597423182	0.321448512075118	-0.155236085348064	17	41832466	R	II	SOST	3'UTR	shore	3'UTR-shore	chr17:41832717-41833195	NA	TRUE				High-ICI hypermethylated probes
cg02592133	-0.239748061417228	0.506067709145845	-4.55750391755294	3.16060358491738e-05	0.0143440530533278	1.44488686831401	0.673438997305042	0.433690935887813	-0.239748061417228	2	99526035	R	II	C2orf55	5'UTR	opensea	5'UTR-opensea		TRUE	TRUE				High-ICI hypermethylated probes
cg16825062	-0.297059863475831	0.584879373927474	-4.55695152930909	3.16654244162186e-05	0.0143440530533278	1.44306130184582	0.79226078805211	0.495200924576279	-0.297059863475831	17	12694678	F	II	RICH2	Body	shore	Body-shore	chr17:12692737-12693690	NA	NA				High-ICI hypermethylated probes
cg18566177	-0.12098948607616	0.158860785622797	-4.55631916040975	3.17335457731988e-05	0.0143440530533278	1.4409715264959	0.243325143826908	0.122335657750748	-0.12098948607616	6	134491483	R	I	SGK1	Body	opensea	Body-opensea		NA	NA				High-ICI hypermethylated probes
cg22673826	-0.245402996265075	0.730150347702164	-4.55499847823435	3.18762772113024e-05	0.0143926839043394	1.43660749749791	0.901469420566462	0.656066424301387	-0.245402996265076	1	942498	F	II		IGR	opensea	IGR-opensea		NA	NA				High-ICI hypermethylated probes
cg07224931	-0.233920915059414	0.592590279070041	-4.5532830201847	3.206261058872e-05	0.0144006136443076	1.43093978891979	0.755893559394537	0.521972644335124	-0.233920915059414	12	121130567	F	II	MLEC	Body	opensea	Body-opensea		NA	NA	low-CpG:119614877-119614956			High-ICI hypermethylated probes
cg14886235	0.244748015301851	0.246234089869536	4.55324806994146	3.20664179321523e-05	0.0144006136443076	1.43082432616893	0.0753722678663571	0.320120283168208	0.244748015301851	19	48867686	F	I	TMEM143	TSS1500	shore	TSS1500-shore	chr19:48866487-48866707	NA	TRUE				Low-ICI hypermethylated probes
cg24663541	-0.254696975160841	0.555903311900734	-4.55318219468536	3.20735953271792e-05	0.0144006136443076	1.43060669957928	0.733710634182831	0.47901365902199	-0.254696975160841	1	3320854	F	I	PRDM16	Body	shore	Body-shore	chr1:3321269-3322310	NA	NA		rs75638413		High-ICI hypermethylated probes
cg13545874	-0.204270792630657	0.314993429543402	-4.55275437371543	3.21202464949723e-05	0.0144006136443076	1.42919337591579	0.457597567794993	0.253326775164335	-0.204270792630657	17	72984872	R	II	CDR2L	Body	shore	Body-shore	chr17:72983621-72984591	NA	NA				High-ICI hypermethylated probes
cg06398881	-0.159098439454493	0.648442904456074	-4.55270971318744	3.21251202629864e-05	0.0144006136443076	1.42904584135431	0.759511626339399	0.600413186884906	-0.159098439454493	22	28035524	R	II		IGR	shore	IGR-shore	chr22:28034987-28035310	NA	NA				High-ICI hypermethylated probes
cg00253564	-0.123135325357032	0.626028831353477	-4.55257351107191	3.21399883545787e-05	0.0144006136443076	1.4285959060437	0.711991228300839	0.588855902943807	-0.123135325357032	1	6552403	F	II	PLEKHG5	Body	shore	Body-shore	chr1:6550083-6551115	NA	NA				High-ICI hypermethylated probes
cg21156129	-0.172567919610972	0.236450572787997	-4.55070016522584	3.23451699857398e-05	0.0144318758652274	1.42240800813675	0.356922516667355	0.184354597056383	-0.172567919610972	1	54941031	R	II		IGR	shore	IGR-shore	chr1:54940346-54940753	TRUE	TRUE				High-ICI hypermethylated probes
cg09650134	-0.195485803240809	0.556659963653535	-4.55031176601226	3.2387870026569e-05	0.0144318758652274	1.42112521302144	0.693131184783911	0.497645381543102	-0.195485803240809	7	955119	R	II	ADAP1	Body	opensea	Body-opensea		NA	NA				High-ICI hypermethylated probes
cg14392725	-0.253955052453833	0.600163966574725	-4.54912630361045	3.25185389113289e-05	0.0144318758652274	1.41721018790521	0.77745334281608	0.523498290362247	-0.253955052453833	9	109893226	F	II		IGR	opensea	IGR-opensea		NA	TRUE				High-ICI hypermethylated probes
cg00676085	-0.249473761256455	0.438691637248461	-4.54893956055464	3.2539169775106e-05	0.0144318758652274	1.41659350323172	0.612852564918062	0.363378803661607	-0.249473761256456	12	52991945	R	II	KRT72	Body	shelf	Body-shelf	chr12:52994772-52995312	NA	NA				High-ICI hypermethylated probes
cg02130107	-0.145485860428575	0.367602261612487	-4.54885841633839	3.25481383522389e-05	0.0144318758652274	1.41632554273064	0.469167862289039	0.323682001860464	-0.145485860428575	16	29828598	R	II	C16orf53	Body	shore	Body-shore	chr16:29826662-29828302	NA	NA				High-ICI hypermethylated probes
cg18992153	0.189800590216194	0.713497622839129	4.54873154989299	3.25621652824732e-05	0.0144318758652274	1.41590659897102	0.580995324008956	0.77079591422515	0.189800590216194	2	69785993	F	II	AAK1	Body	opensea	Body-opensea		NA	TRUE				Low-ICI hypermethylated probes
cg03745604	-0.121878244632249	0.135226045279742	-4.54781175905845	3.26640383228198e-05	0.0144516736800944	1.41286937649923	0.22031085757018	0.0984326129379312	-0.121878244632249	15	89905304	F	II		IGR	island	IGR-island	chr15:89904822-89906050	NA	TRUE		rs3803528		High-ICI hypermethylated probes
cg13385210	-0.218474242678749	0.327674100488128	-4.54769121902109	3.26774120025773e-05	0.0144516736800944	1.41247136323522	0.480193854811029	0.26171961213228	-0.218474242678749	17	38599271	R	II	IGFBP4	TSS1500	island	TSS1500-island	chr17:38599270-38599524	TRUE	NA				High-ICI hypermethylated probes
cg06380072	-0.208644338780936	0.716898321847408	-4.54714269964416	3.27383367407566e-05	0.0144629990205988	1.4106602546361	0.862555690430326	0.65391135164939	-0.208644338780936	17	79687834	F	I	SLC25A10	3'UTR	opensea	3'UTR-opensea		NA	NA		rs35550502		High-ICI hypermethylated probes
cg15348839	-0.223245986777534	0.417543558267167	-4.5465242233017	3.28071648067423e-05	0.0144727205509765	1.40861827362532	0.573394530168465	0.35014854339093	-0.223245986777535	2	232224846	R	II		IGR	opensea	IGR-opensea		NA	TRUE				High-ICI hypermethylated probes
cg07611575	-0.241148204115264	0.635943030913593	-4.54526580506721	3.29476465277014e-05	0.014486867679468	1.40446380835388	0.80429177718274	0.563143573067476	-0.241148204115264	16	3593230	R	I	NLRC3	Body	opensea	Body-opensea		NA	TRUE				High-ICI hypermethylated probes
cg02333467	-0.12971288504609	0.19217928033894	-4.54439884260325	3.30447703850901e-05	0.014486867679468	1.40160195860949	0.282733558578664	0.153020673532574	-0.12971288504609	7	100290845	R	II		IGR	shore	IGR-shore	chr7:100291183-100292266	NA	NA				High-ICI hypermethylated probes
cg08110058	-0.291663026261005	0.576992149392582	-4.54412627370133	3.30753634208881e-05	0.014486867679468	1.40070225502315	0.780605960178567	0.488942933917562	-0.291663026261005	1	3073806	F	II	PRDM16	Body	shore	Body-shore	chr1:3071899-3072239	NA	NA				High-ICI hypermethylated probes
cg09335712	-0.223246822779056	0.645943019486882	-4.54320900412424	3.31785208164739e-05	0.0145154727190867	1.39767467446851	0.801794575011884	0.578547752232828	-0.223246822779056	17	62255234	F	II	TEX2	Body	opensea	Body-opensea		NA	TRUE				High-ICI hypermethylated probes
cg20641531	-0.304176775274603	0.351499741619292	-4.54291579727645	3.32115615071673e-05	0.0145154727190867	1.39670695837123	0.563849565867599	0.259672790592997	-0.304176775274603	7	8302731	F	II	ICA1	TSS1500	shore	TSS1500-shore	chr7:8301031-8302252	NA	NA				High-ICI hypermethylated probes
cg20142972	-0.169225960224319	0.561995697169721	-4.54019101296185	3.3520151522967e-05	0.0145725834103976	1.3877152140023	0.680134575062171	0.510908614837851	-0.169225960224319	7	150652808	R	II	KCNH2	5'UTR	island	5'UTR-island	chr7:150652807-150653080	NA	TRUE				High-ICI hypermethylated probes
cg26216876	-0.225787921802479	0.341297004951123	-4.5381275609472	3.37557057820693e-05	0.0146492621926803	1.38090740029626	0.498922535266061	0.273134613463582	-0.225787921802479	20	57617083	R	II	SLMO2	Body	shore	Body-shore	chr20:57617430-57618222	NA	NA				High-ICI hypermethylated probes
cg10542127	-0.154423546198463	0.339243050947788	-4.53744867037404	3.38335577730655e-05	0.0146572265711676	1.37866787192062	0.447048168105205	0.292624621906742	-0.154423546198463	1	2378521	F	II		IGR	shelf	IGR-shelf	chr1:2374818-2375814	TRUE	TRUE				High-ICI hypermethylated probes
cg04770764	-0.209390312614732	0.652891347012009	-4.5367685542239	3.3911726173825e-05	0.0146612706266928	1.37642444534282	0.799069489780784	0.589679177166052	-0.209390312614732	8	22556461	F	II		IGR	shelf	IGR-shelf	chr8:22547486-22553427	NA	NA				High-ICI hypermethylated probes
cg24915751	-0.242957069469945	0.580135907669504	-4.53622127004513	3.39747557535577e-05	0.0146612706266928	1.37461928264358	0.749747446733427	0.506790377263483	-0.242957069469945	6	170561236	R	I		IGR	shelf	IGR-shelf	chr6:170564873-170565152	NA	NA				High-ICI hypermethylated probes
cg01796225	-0.266160864337413	0.506690625579243	-4.53476377749096	3.41431708519373e-05	0.0147091144330815	1.36981234564621	0.692501040305362	0.426340175967949	-0.266160864337413	11	89954258	R	II	CHORDC1	Body	shore	Body-shore	chr11:89955742-89956358	NA	NA				High-ICI hypermethylated probes
cg21186235	-0.166490831008662	0.440210695442929	-4.53464044309387	3.41574596627822e-05	0.0147091144330815	1.36940560866423	0.55644014350558	0.389949312496917	-0.166490831008662	9	127218781	R	II	GPR144	Body	shelf	Body-shelf	chr9:127215291-127216022	NA	NA				High-ICI hypermethylated probes
cg12708109	-0.236479916732065	0.521925603171867	-4.5335848995278	3.42799879998367e-05	0.0147308985998123	1.36592479114111	0.687015356362176	0.450535439630112	-0.236479916732065	1	168397916	R	II		IGR	opensea	IGR-opensea		NA	TRUE				High-ICI hypermethylated probes
cg22370057	0.193723342053516	0.603612795133653	4.53241907935869	3.44158163102136e-05	0.0147737647696609	1.36208072592848	0.468371971435916	0.662095313489432	0.193723342053516	6	12957918	F	II	PHACTR1	Body	opensea	Body-opensea		NA	TRUE	low-CpG:13065524-13066228		rs78345140	Low-ICI hypermethylated probes
cg26426245	-0.149199671459091	0.227962734368904	-4.53158029418434	3.45138672037547e-05	0.0148003413408218	1.35931525900069	0.332120995576194	0.182921324117103	-0.149199671459091	5	1745535	R	II		IGR	island	IGR-island	chr5:1745534-1745851	NA	NA				High-ICI hypermethylated probes
cg26318321	-0.213442348116532	0.596394549549558	-4.53033002346425	3.46605259099062e-05	0.0148349068425434	1.35519353839746	0.74540147181959	0.531959123703057	-0.213442348116532	19	15446617	R	II		IGR	shelf	IGR-shelf	chr19:15442261-15443077	NA	NA				High-ICI hypermethylated probes
cg03952578	0.172691562908312	0.33202073348793	4.52937042837051	3.4773500621147e-05	0.0148349068425434	1.35203041057437	0.211462472589675	0.384154035497987	0.172691562908312	15	61509038	F	II	RORA	Body	opensea	Body-opensea		NA	TRUE				Low-ICI hypermethylated probes
cg12501761	0.303441123105224	0.45732821906303	4.52913040892978	3.48018146901602e-05	0.0148349068425434	1.3512392761422	0.245491963310326	0.54893308641555	0.303441123105224	2	240898385	F	I	NDUFA10	3'UTR	opensea	3'UTR-opensea		NA	TRUE		rs6736791		Low-ICI hypermethylated probes
cg10667207	-0.224291428777609	0.752871605587955	-4.52885151261946	3.48347431827289e-05	0.0148349068425434	1.35032002139691	0.90945241435723	0.685160985579621	-0.224291428777609	6	32035188	F	II	TNXB	Body	opensea	Body-opensea		NA	NA				High-ICI hypermethylated probes
cg10765336	-0.228911811420543	0.319953032203359	-4.52877188701129	3.48441499343546e-05	0.0148349068425434	1.35005757631294	0.479759391119587	0.250847579699044	-0.228911811420543	19	359491	F	II		IGR	shore	IGR-shore	chr19:360071-361949	NA	NA				High-ICI hypermethylated probes
cg02506753	-0.146066686914463	0.276214878816595	-4.5283306470801	3.48963217986368e-05	0.0148349068425434	1.34860329076303	0.378185962134239	0.232119275219776	-0.146066686914463	1	1245184	F	II	PUSL1	Body	island	Body-island	chr1:1242400-1245185	NA	NA				High-ICI hypermethylated probes
cg20663612	-0.296628407325446	0.687659281603294	-4.52791142379111	3.4945961110601e-05	0.0148349068425434	1.34722162677513	0.89473949049087	0.598111083165423	-0.296628407325447	2	242845232	R	II		IGR	shore	IGR-shore	chr2:242843760-242844198	NA	NA				High-ICI hypermethylated probes
cg04755561	-0.117835115886459	0.279537477408162	-4.52741550627826	3.50047706683057e-05	0.0148349068425434	1.34558726762136	0.36179972812135	0.243964612234891	-0.117835115886459	16	3029641	F	II	PKMYT1	Body	shore	Body-shore	chr16:3029752-3030954	NA	NA				High-ICI hypermethylated probes
cg04044203	-0.262697116459016	0.498319530780544	-4.52719561737616	3.50308776386556e-05	0.0148349068425434	1.34486262059595	0.681711857365141	0.419014740906124	-0.262697116459017	11	124631218	F	II	ESAM	Body	shore	Body-shore	chr11:124632063-124633239	TRUE	NA				High-ICI hypermethylated probes
cg02902946	-0.258136846100687	0.531118411446674	-4.52617646503902	3.51521281032161e-05	0.0148349068425434	1.34150418835277	0.711327153064135	0.453190306963448	-0.258136846100687	20	57617168	F	II	SLMO2	Body	shore	Body-shore	chr20:57617430-57618222	NA	NA				High-ICI hypermethylated probes
cg21045241	-0.183893333444667	0.365906576059673	-4.52582136198279	3.51944715938811e-05	0.0148349068425434	1.34033408731971	0.49428494091727	0.310391607472603	-0.183893333444667	19	45506088	R	II	RELB	Body	shore	Body-shore	chr19:45504865-45505299	NA	NA				High-ICI hypermethylated probes
cg25456317	0.224587682054248	0.60789798320809	4.52568880726534	3.52102905577477e-05	0.0148349068425434	1.33989731610088	0.451110356113614	0.675698038167863	0.224587682054248	4	123160876	F	II	KIAA1109	Body	opensea	Body-opensea		NA	NA	low-CpG:123380277-123380619			Low-ICI hypermethylated probes
cg19433341	-0.232382995455173	0.548180323614762	-4.52533425674159	3.5252636442575e-05	0.0148374832392415	1.33872909018348	0.710409961951393	0.478026966496219	-0.232382995455174	8	21900337	F	II	FGF17	TSS200	opensea	TSS200-opensea		NA	NA				High-ICI hypermethylated probes
cg06188870	-0.15598147576627	0.787690853829781	-4.5250032339189	3.5292217182461e-05	0.0148388917185467	1.33763842261483	0.896583582194913	0.740602106428643	-0.15598147576627	10	135086785	R	I	ADAM8	Body	shelf	Body-shelf	chr10:135089969-135090491	NA	NA				High-ICI hypermethylated probes
cg00003345	-0.195394788820427	0.38693871888723	-4.52283487772962	3.55525651966621e-05	0.0149018956939429	1.33049488844728	0.523346401648661	0.327951612828234	-0.195394788820427	1	10816499	R	II	CASZ1	5'UTR	opensea	5'UTR-opensea		TRUE	TRUE				High-ICI hypermethylated probes
cg05712125	-0.162606613442503	0.223636902334248	-4.52272743733161	3.55655138982179e-05	0.0149018956939429	1.3301409703489	0.337154726812977	0.174548113370474	-0.162606613442503	1	9513980	F	II		IGR	opensea	IGR-opensea		NA	NA				High-ICI hypermethylated probes
cg00601450	-0.261460576311219	0.350778581187568	-4.5219547224599	3.56587771630182e-05	0.0149164416511361	1.32759568712877	0.533307662763324	0.271847086452105	-0.261460576311219	5	74908170	F	I		IGR	shore	IGR-shore	chr5:74907286-74907770	NA	NA				High-ICI hypermethylated probes
cg18523477	-0.140946962062196	0.293114229476275	-4.52164150099494	3.56966496000263e-05	0.0149170470654086	1.32656400537111	0.391511165255544	0.250564203193348	-0.140946962062196	20	55967503	R	II	RBM38	Body	shore	Body-shore	chr20:55966212-55966964	NA	NA				High-ICI hypermethylated probes
cg12699865	-0.150067766376239	0.304840723755999	-4.52043688766206	3.58426689787837e-05	0.0149376945695534	1.32259656612639	0.409605013490355	0.259537247114115	-0.150067766376239	20	32583031	F	II	RALY	5'UTR	shore	5'UTR-shore	chr20:32580799-32582502	NA	NA				High-ICI hypermethylated probes
cg02447620	-0.176171361031011	0.543471189746004	-4.52034634239694	3.58536681265592e-05	0.0149376945695534	1.32229837042625	0.666458743673313	0.490287382642303	-0.176171361031011	6	43604584	R	II	MAD2L1BP	Body	shore	Body-shore	chr6:43603495-43603818	NA	NA				High-ICI hypermethylated probes
cg00230517	-0.316494607144738	0.602762165657952	-4.51994725292194	3.59021875293368e-05	0.0149376945695534	1.32098406681695	0.823711231023146	0.507216623878408	-0.316494607144738	2	65648650	R	II	SPRED2	Body	opensea	Body-opensea		NA	TRUE				High-ICI hypermethylated probes
cg08641867	0.179840046160766	0.646783423831348	4.51991848000932	3.59056880804455e-05	0.0149376945695534	1.32088931221024	0.521234712360625	0.701074758521391	0.179840046160766	1	84395855	R	II	TTLL7	Body	opensea	Body-opensea		NA	NA				Low-ICI hypermethylated probes
cg00695214	-0.301632174955586	0.609230483625288	-4.51913292785467	3.60013882882874e-05	0.0149376945695534	1.31830244252995	0.819803888782961	0.518171713827375	-0.301632174955586	1	1415868	R	II	ATAD3B	Body	shore	Body-shore	chr1:1417285-1417753	TRUE	NA				High-ICI hypermethylated probes
cg10274108	-0.190949511714167	0.658305008006283	-4.51828866740112	3.61045183725489e-05	0.014947409260759	1.31552246057689	0.791609384108626	0.600659872394459	-0.190949511714167	4	38082931	R	I	TBC1D1	Body	opensea	Body-opensea		NA	NA				High-ICI hypermethylated probes
cg17006413	-0.259193072481282	0.747881129887316	-4.51721630626122	3.6235927970864e-05	0.014947409260759	1.31199171360388	0.92882723709123	0.669634164609948	-0.259193072481282	1	942451	R	I		IGR	opensea	IGR-opensea		NA	NA				High-ICI hypermethylated probes
cg03841784	0.142187674960538	0.704843014769796	4.51683871037266	3.62823105324816e-05	0.014947409260759	1.31074856654336	0.60557992092942	0.747767595889958	0.142187674960538	12	1890922	R	II	ADIPOR2	Body	opensea	Body-opensea		NA	TRUE			rs11061981	Low-ICI hypermethylated probes
cg26229224	-0.160882112483587	0.680087267368554	-4.51667661971012	3.63022389649715e-05	0.014947409260759	1.31021493440829	0.792401194951435	0.631519082467848	-0.160882112483588	16	3018262	R	II	KREMEN2	3'UTR	island	3'UTR-island	chr16:3016646-3020326	NA	NA				High-ICI hypermethylated probes
cg21688288	-0.111313415848637	0.226896849994109	-4.51666382056408	3.6303813026716e-05	0.014947409260759	1.31017279763087	0.304606215775233	0.193292799926596	-0.111313415848637	21	44181258	R	II	PDE9A	Body	opensea	Body-opensea		TRUE	NA				High-ICI hypermethylated probes
cg24631547	-0.172303750968171	0.509552523238779	-4.51655375967121	3.63173512620688e-05	0.014947409260759	1.30981046221244	0.629840047499577	0.457536296531406	-0.172303750968171	12	58147265	R	II	CDK4	TSS1500	shore	TSS1500-shore	chr12:58148888-58149781	NA	NA				High-ICI hypermethylated probes
cg14731407	-0.196119049218096	0.267146775064768	-4.5163953882314	3.63368406733769e-05	0.014947409260759	1.30928908864033	0.404060073575514	0.207941024357418	-0.196119049218096	19	11462649	R	I	CCDC159	Body	shelf	Body-shelf	chr19:11466008-11466317	NA	NA				High-ICI hypermethylated probes
cg22937571	-0.255183853938064	0.46106895067179	-4.51569547758841	3.64230950347628e-05	0.014947409260759	1.30698501258917	0.63921616945874	0.384032315520676	-0.255183853938064	13	39068618	R	II		IGR	opensea	IGR-opensea		NA	NA				High-ICI hypermethylated probes
cg24335751	-0.204543064590049	0.327123171171789	-4.51566955141754	3.64262939159846e-05	0.014947409260759	1.3068996677194	0.469917386074275	0.265374321484227	-0.204543064590049	1	3182620	F	II	PRDM16	Body	shore	Body-shore	chr1:3182821-3183216	NA	NA				High-ICI hypermethylated probes
cg02841651	-0.314178522172853	0.632450759563802	-4.51402362919311	3.66299373311342e-05	0.0150093497576703	1.30148198722702	0.851782935420321	0.537604413247469	-0.314178522172853	11	133449527	F	I		IGR	opensea	IGR-opensea		NA	TRUE				High-ICI hypermethylated probes
cg07221454	-0.196706434069866	0.653197899589068	-4.5136763850996	3.66730422565531e-05	0.0150093497576703	1.3003391161367	0.790521259222749	0.593814825152882	-0.196706434069866	11	60552841	R	II	MS4A10	5'UTR	opensea	5'UTR-opensea		NA	NA				High-ICI hypermethylated probes
cg18455650	-0.297986222581602	0.598802224434857	-4.51343299523301	3.67032848248833e-05	0.0150093497576703	1.29953807925994	0.806830342086165	0.508844119504562	-0.297986222581603	2	241389208	R	II	PP14571	Body	shelf	Body-shelf	chr2:241391876-241393598	NA	NA				High-ICI hypermethylated probes
cg04164838	-0.182178126615591	0.330263897824854	-4.5126069862485	3.68061027932044e-05	0.0150093497576703	1.29681968529021	0.457444854141398	0.275266727525808	-0.182178126615591	19	14591148	R	I	GIPC1	Body	island	Body-island	chr19:14591032-14591308	TRUE	NA				High-ICI hypermethylated probes
cg24336219	-0.256451875715908	0.448518892788981	-4.51241553450199	3.68299739832359e-05	0.0150093497576703	1.29618964887649	0.627551334326501	0.371099458610593	-0.256451875715908	12	128998713	R	II	TMEM132C	Body	opensea	Body-opensea		NA	TRUE				High-ICI hypermethylated probes
cg07271186	-0.151751128943655	0.231684096082018	-4.51234983430077	3.68381693063336e-05	0.0150093497576703	1.29597344293167	0.337623563457777	0.185872434514122	-0.151751128943655	7	142028043	R	I		IGR	opensea	IGR-opensea		NA	NA				High-ICI hypermethylated probes
cg22129180	-0.26917373141208	0.280139988310101	-4.51216681617242	3.68610080435133e-05	0.0150093497576703	1.29537117487349	0.468053725333629	0.198879993921549	-0.26917373141208	8	49892980	R	II		IGR	shelf	IGR-shelf	chr8:49890386-49890874	NA	NA				High-ICI hypermethylated probes
cg04012053	-0.311445715400742	0.671194573705184	-4.51134796580064	3.69633613826452e-05	0.0150093497576703	1.29267666811049	0.888618941060419	0.577173225659677	-0.311445715400742	16	70680631	F	I	IL34	1stExon	opensea	1stExon-opensea		NA	NA				High-ICI hypermethylated probes
cg15718663	-0.285785243448072	0.574158217576829	-4.51062709163137	3.70536977017446e-05	0.0150093497576703	1.29030473785125	0.773668670550012	0.48788342710194	-0.285785243448072	11	3187784	F	I	OSBPL5	TSS1500	shore	TSS1500-shore	chr11:3186131-3186768	NA	NA				High-ICI hypermethylated probes
cg25327296	-0.156049607854484	0.721000760951925	-4.50958177209085	3.71850749298452e-05	0.0150177016122793	1.28686556125137	0.829941053227697	0.673891445373213	-0.156049607854483	11	44927093	F	II	TSPAN18	5'UTR	opensea	5'UTR-opensea		NA	TRUE				High-ICI hypermethylated probes
cg14557690	-0.155078621921792	0.396636898743378	-4.50925472162573	3.72262724226742e-05	0.0150177016122793	1.2857896130027	0.504899332915195	0.349820710993403	-0.155078621921792	9	139978293	F	II	UAP1L1	3'UTR	shelf	3'UTR-shelf	chr9:139980377-139981887	TRUE	TRUE				High-ICI hypermethylated probes
cg10723962	0.197277288064766	0.231174094003068	4.50921691830504	3.72310372575125e-05	0.0150177016122793	1.28566524779358	0.0934522136559667	0.290729501720733	0.197277288064766	6	26240782	F	I	HIST1H4F	1stExon	island	1stExon-island	chr6:26240697-26240951	NA	NA				Low-ICI hypermethylated probes
cg22689848	0.155115725182359	0.524537764283003	4.50897562724415	3.72614642821247e-05	0.0150177016122793	1.28487146016121	0.416249427834941	0.5713651530173	0.155115725182359	15	63615518	R	II		IGR	shore	IGR-shore	chr15:63613667-63614085	NA	TRUE				Low-ICI hypermethylated probes
cg16739178	-0.169439048175159	0.354797082717598	-4.5077175425743	3.74205036567982e-05	0.01503892951968	1.28073297425107	0.473084720122897	0.303645671947738	-0.169439048175159	16	85470674	R	II		IGR	opensea	IGR-opensea		TRUE	TRUE				High-ICI hypermethylated probes
cg05743883	-0.222020973138945	0.700061145471018	-4.50627296186735	3.76039362289911e-05	0.0150586930579303	1.27598162851672	0.855056919171791	0.633035946032846	-0.222020973138945	8	142277447	R	II		IGR	opensea	IGR-opensea		NA	NA				High-ICI hypermethylated probes
cg01076459	-0.128390779923399	0.246745719584535	-4.50619751744888	3.76135402301488e-05	0.0150586930579303	1.27573350382718	0.336377018776342	0.207986238852943	-0.128390779923399	17	2908230	F	II	RAP1GAP2	Body	opensea	Body-opensea		NA	TRUE				High-ICI hypermethylated probes
cg09581049	-0.12231655818423	0.336520740633989	-4.50534837607928	3.77218004020884e-05	0.0150586930579303	1.27294093801403	0.421911545404112	0.299594987219882	-0.12231655818423	17	42998320	F	II		IGR	opensea	IGR-opensea		NA	TRUE				High-ICI hypermethylated probes
cg09620688	-0.202685182528859	0.497526062234749	-4.50480582140756	3.77911319296805e-05	0.0150586930579303	1.27115676222633	0.639023265132254	0.436338082603395	-0.202685182528859	11	64973088	F	II	CAPN1	Body	shore	Body-shore	chr11:64972185-64972404	NA	NA				High-ICI hypermethylated probes
cg01279378	-0.128578931401967	0.626075649860639	-4.50460615171768	3.78166784599292e-05	0.0150586930579303	1.27050017768287	0.715838300084654	0.587259368682687	-0.128578931401967	15	40531871	F	I	PAK6	5'UTR	shore	5'UTR-shore	chr15:40531244-40531589	NA	TRUE				High-ICI hypermethylated probes
cg03344351	-0.225627565480105	0.468666679033131	-4.50413944796217	3.78764561643012e-05	0.0150586930579303	1.26896554028457	0.626180262481506	0.400552697001401	-0.225627565480105	18	77497016	R	II	CTDP1	Body	island	Body-island	chr18:77496768-77497180	NA	NA				High-ICI hypermethylated probes
cg17150663	-0.146112127939194	0.700378067024428	-4.50387200510065	3.79107531263878e-05	0.0150586930579303	1.2680861533017	0.802380873321601	0.656268745382408	-0.146112127939194	7	128551672	F	II	KCP	TSS1500	shore	TSS1500-shore	chr7:128550409-128550903	NA	NA				High-ICI hypermethylated probes
cg15238694	-0.1375202355189	0.208547851466522	-4.50365567285912	3.79385178257965e-05	0.0150586930579303	1.26737484138708	0.304552544187264	0.167032308668363	-0.1375202355189	12	119740840	R	II	LOC144742	Body	opensea	Body-opensea		NA	TRUE				High-ICI hypermethylated probes
cg12352038	-0.170704004584752	0.353910239801338	-4.50331045329138	3.79828654156814e-05	0.0150586930579303	1.26623977200767	0.473080959983146	0.302376955398394	-0.170704004584752	20	62114621	F	II		IGR	shelf	IGR-shelf	chr20:62111291-62111516	TRUE	NA				High-ICI hypermethylated probes
cg01502396	-0.226558267461752	0.252101899205342	-4.50285925316748	3.80409037857574e-05	0.0150664788817854	1.26475629973649	0.410265217999395	0.183706950537643	-0.226558267461752	11	46403923	R	II	MDK	Body	island	Body-island	chr11:46402624-46404139	NA	TRUE				High-ICI hypermethylated probes
cg17351793	-0.323281254496906	0.634842467959782	-4.50194540977295	3.81587178518909e-05	0.0150839643697041	1.26175193104481	0.86052938147649	0.537248126979584	-0.323281254496906	14	36007385	F	II		IGR	shelf	IGR-shelf	chr14:36002598-36005013	NA	NA				High-ICI hypermethylated probes
cg14324200	-0.11902021462275	0.218197958181854	-4.50127615540765	3.82452250212724e-05	0.0150861464929489	1.25955184695514	0.301287541975095	0.182267327352345	-0.11902021462275	1	861317	F	II	SAMD11	5'UTR	island	5'UTR-island	chr1:858970-861632	NA	NA				High-ICI hypermethylated probes
cg13872831	0.117657373641907	0.814694174385384	4.50098422789524	3.82830192322161e-05	0.0150861464929489	1.2585922191618	0.732556007880657	0.850213381522563	0.117657373641907	3	50377988	F	I	RASSF1	1stExon	island	1stExon-island	chr3:50377803-50378540	TRUE	TRUE				Low-ICI hypermethylated probes
cg12866899	-0.200463114783313	0.330459749492492	-4.5002800238715	3.83743386866459e-05	0.0150861464929489	1.25627746287447	0.470405697548767	0.269942582765454	-0.200463114783313	4	183756344	F	I		IGR	opensea	IGR-opensea		NA	NA		rs11933016		High-ICI hypermethylated probes
cg07429623	-0.214817367650989	0.359213921320774	-4.49953306587311	3.84714347846821e-05	0.0150861464929489	1.25382234517441	0.509180762888445	0.294363395237457	-0.214817367650989	1	205326201	F	II	KLHDC8A	TSS200	opensea	TSS200-opensea		NA	NA				High-ICI hypermethylated probes
cg15587013	-0.130553366029843	0.245392617812523	-4.49942940564153	3.84849283804852e-05	0.0150861464929489	1.25348164657593	0.336533646927697	0.205980280897853	-0.130553366029843	6	33394838	R	II	SYNGAP1	Body	shore	Body-shore	chr6:33396050-33396296	NA	NA				High-ICI hypermethylated probes
cg26701289	-0.132666270835177	0.190470537772837	-4.49941237746993	3.84871454029276e-05	0.0150861464929489	1.2534256806567	0.283086613638904	0.150420342803727	-0.132666270835177	15	73611289	F	II		IGR	island	IGR-island	chr15:73611173-73611529	NA	TRUE				High-ICI hypermethylated probes
cg16658255	-0.191999753576584	0.468731360977649	-4.49922260147662	3.85118621696543e-05	0.0150861464929489	1.25280195655222	0.602768924795264	0.41076917121868	-0.191999753576584	5	598906	F	II		IGR	shelf	IGR-shelf	chr5:602124-602553	NA	NA				High-ICI hypermethylated probes
cg25786273	-0.149513054665672	0.713558404605512	-4.49874259773375	3.85744479053828e-05	0.0150861464929489	1.2512244116516	0.81793544276834	0.668422388102668	-0.149513054665672	18	74801026	R	II	MBP	Body	shore	Body-shore	chr18:74799144-74800038	TRUE	NA				High-ICI hypermethylated probes
cg06076690	-0.159068498767372	0.458684521849735	-4.49870501572912	3.85793522592486e-05	0.0150861464929489	1.25110090051712	0.569732341743939	0.410663842976566	-0.159068498767372	16	88933070	F	I	PABPN1L	TSS200	shelf	TSS200-shelf	chr16:88937055-88937387	NA	NA		rs59556256		High-ICI hypermethylated probes
cg15207619	0.309965980843189	0.364139001405287	4.49834019224852	3.86269924206668e-05	0.0150861464929489	1.24990195224091	0.147747656288343	0.457713637131533	0.309965980843189	13	49975643	R	II	CAB39L	5'UTR	opensea	5'UTR-opensea		NA	TRUE				Low-ICI hypermethylated probes
cg08244028	-0.198548519877934	0.367112912094434	-4.49729872864365	3.87633072511176e-05	0.0151091166522328	1.24647954225079	0.505722256160161	0.307173736282228	-0.198548519877934	5	79949339	R	II	DHFR	Body	shore	Body-shore	chr5:79950003-79950873	NA	NA				High-ICI hypermethylated probes
cg18071202	-0.202029763549706	0.510196943635604	-4.49692259820405	3.88126534533799e-05	0.0151091166522328	1.24524360494758	0.651236589887286	0.44920682633758	-0.202029763549706	12	1609470	R	II	LOC100292680	TSS200	opensea	TSS200-opensea		TRUE	NA				High-ICI hypermethylated probes
cg12612445	-0.154037923314011	0.60495126372852	-4.49504777280176	3.90595360812699e-05	0.0151551429573018	1.23908374052281	0.71248717245717	0.558449249143159	-0.154037923314011	21	46353573	F	I	C21orf67	Body	shore	Body-shore	chr21:46351328-46352911	NA	NA		rs79917387		High-ICI hypermethylated probes
cg24461952	-0.176223402380652	0.200472417708208	-4.49475597220196	3.90980988672499e-05	0.0151551429573018	1.23812511137653	0.323496302389041	0.147272900008388	-0.176223402380652	12	132904014	F	II	GALNT9	Body	shore	Body-shore	chr12:132905449-132906206	NA	NA				High-ICI hypermethylated probes
cg19138865	-0.231197995363105	0.699987912629326	-4.49345457388227	3.92705375801657e-05	0.0151551429573018	1.23385006399357	0.861390286750739	0.630192291387634	-0.231197995363105	17	17291334	R	I		IGR	shelf	IGR-shelf	chr17:17286964-17287372	TRUE	NA				High-ICI hypermethylated probes
cg03695613	-0.148111475346087	0.305123873271395	-4.49335418684306	3.92838699262015e-05	0.0151551429573018	1.2335203186867	0.408522450399795	0.260410975053708	-0.148111475346087	20	43936663	F	II	RBPJL	Body	shore	Body-shore	chr20:43935199-43935633	NA	TRUE				High-ICI hypermethylated probes
cg21903378	-0.112972281303555	0.223585924505707	-4.4929382368417	3.93391591072866e-05	0.0151551429573018	1.23215406559101	0.302453366170452	0.189481084866898	-0.112972281303554	14	104686811	F	I		IGR	shore	IGR-shore	chr14:104687157-104687375	NA	NA		rs71880927		High-ICI hypermethylated probes
cg05856556	-0.221587112734855	0.703448354284217	-4.49260834207861	3.93830636011889e-05	0.0151551429573018	1.23107051390535	0.858141244306663	0.636554131571808	-0.221587112734855	7	150104705	R	II	LOC728743	Body	island	Body-island	chr7:150104704-150105530	NA	NA				High-ICI hypermethylated probes
cg22717593	-0.15379440267423	0.697872430321462	-4.49247971584207	3.94001949558598e-05	0.0151551429573018	1.23064804568309	0.805238334075169	0.651443931400939	-0.15379440267423	19	45647012	R	I		IGR	shore	IGR-shore	chr19:45647957-45648823	TRUE	NA				High-ICI hypermethylated probes
cg16526047	-0.143913778069035	0.494553138553595	-4.49205681092692	3.9456571722217e-05	0.0151551429573018	1.22925906720786	0.595021247771601	0.451107469702566	-0.143913778069035	1	949893	F	II	ISG15	3'UTR	shore	3'UTR-shore	chr1:948670-948894	NA	TRUE		rs2799070		High-ICI hypermethylated probes
cg14113931	-0.223826776603957	0.453796777266516	-4.49174609409591	3.94980430486343e-05	0.0151551429573018	1.22823859309015	0.610053206216448	0.386226429612491	-0.223826776603957	18	12701670	R	II	CEP76	Body	shore	Body-shore	chr18:12702184-12703242	NA	NA				High-ICI hypermethylated probes
cg16024937	-0.174749537471625	0.531855598650437	-4.49156680180105	3.95219925184873e-05	0.0151551429573018	1.22764976510674	0.653850558772137	0.479101021300513	-0.174749537471625	17	73941150	F	II	ACOX1	3'UTR	shelf	3'UTR-shelf	chr17:73936881-73937417	NA	NA				High-ICI hypermethylated probes
cg12686273	-0.20596786647467	0.471730753746725	-4.48958746202837	3.97873321734942e-05	0.0152279878464321	1.22114994513587	0.615519641663004	0.409551775188334	-0.20596786647467	16	3085867	F	II	CCDC64B	TSS1500	shore	TSS1500-shore	chr16:3086283-3086968	NA	NA				High-ICI hypermethylated probes
cg27545787	-0.141528327808788	0.351182966788829	-4.48640050807805	4.02182158845093e-05	0.0153172869642426	1.21068716898588	0.44998576167421	0.308457433865422	-0.141528327808788	1	2316653	R	I	MORN1	Body	island	Body-island	chr1:2316353-2316749	NA	NA				High-ICI hypermethylated probes
cg09832245	-0.197761162624425	0.391530775872342	-4.48589117345635	4.02874999158608e-05	0.0153172869642426	1.20901532530888	0.529590455440336	0.331829292815911	-0.197761162624425	16	85494611	R	II		IGR	opensea	IGR-opensea		NA	TRUE				High-ICI hypermethylated probes
cg09364122	-0.238001857433787	0.778177977301936	-4.4853933789508	4.03553267184153e-05	0.0153172869642426	1.2073814417144	0.944330217397221	0.706328359963434	-0.238001857433787	1	942198	R	I		IGR	opensea	IGR-opensea		TRUE	NA				High-ICI hypermethylated probes
cg01103253	-0.256872690414894	0.436012995032545	-4.4847076455582	4.04489436003574e-05	0.015337864886	1.20513082733442	0.615339212869357	0.358466522454464	-0.256872690414894	11	74446817	R	II		IGR	shelf	IGR-shelf	chr11:74442260-74442874	NA	NA				High-ICI hypermethylated probes
cg20391220	-0.250511876271634	0.434984456894783	-4.48420277168668	4.05180048342723e-05	0.0153404371855962	1.2034739006052	0.609870106367433	0.359358230095799	-0.250511876271634	15	71059029	R	II		IGR	shelf	IGR-shelf	chr15:71054898-71056230	NA	NA				High-ICI hypermethylated probes
cg20655369	-0.208509569778574	0.490757039305649	-4.48350207061799	4.06140438136433e-05	0.0153514393032377	1.20117443204148	0.63632032386805	0.427810754089476	-0.208509569778574	15	89924975	R	II	LOC254559	Body	shelf	Body-shelf	chr15:89920793-89922768	NA	NA				High-ICI hypermethylated probes
cg24493115	-0.238535490945403	0.613536220070886	-4.48314849578408	4.06625895309862e-05	0.0153514393032377	1.20001417676952	0.780060996768621	0.541525505823217	-0.238535490945403	1	110655091	F	II	UBL4B	5'UTR	opensea	5'UTR-opensea		NA	NA			rs34623488	High-ICI hypermethylated probes
cg09251292	-0.110565426737923	0.18388398098284	-4.48100050919506	4.0958726773455e-05	0.0154112672584073	1.19296642879596	0.261071165686673	0.15050573894875	-0.110565426737923	6	117087056	R	I	FAM162B	TSS200	shore	TSS200-shore	chr6:117085739-117086942	TRUE	NA				High-ICI hypermethylated probes
cg27512716	-0.182004454913346	0.707670370171943	-4.48082096368416	4.0983575341748e-05	0.0154112672584073	1.19237739036307	0.834730083979374	0.652725629066027	-0.182004454913347	19	44219675	R	II	IRGC	TSS1500	shelf	TSS1500-shelf	chr19:44222858-44223943	NA	NA				High-ICI hypermethylated probes
cg13992678	-0.239955572530694	0.435473022879845	-4.48056634087457	4.10188396137583e-05	0.0154112672584073	1.19154206223117	0.602989177288066	0.363033604757372	-0.239955572530694	1	160336590	R	II	NHLH1	TSS1500	opensea	TSS1500-opensea		NA	NA				High-ICI hypermethylated probes
cg09083345	-0.100099223571289	0.222135797544184	-4.47927416743415	4.11982575769305e-05	0.0154542636531213	1.18730321718158	0.292016387584518	0.191917164013229	-0.100099223571289	6	1603532	F	II		IGR	shore	IGR-shore	chr6:1604606-1615866	NA	NA				High-ICI hypermethylated probes
cg05542406	-0.231419568524936	0.571438241179258	-4.47919874696053	4.1208753312875e-05	0.0154542636531213	1.18705582456356	0.732995298451382	0.501575729926447	-0.231419568524936	6	90619788	R	II		IGR	opensea	IGR-opensea		NA	TRUE				High-ICI hypermethylated probes
cg22348299	-0.239596514999201	0.634631387369747	-4.47877544034402	4.12677103533478e-05	0.0154622144100321	1.18566733740522	0.801896878972963	0.562300363973762	-0.239596514999201	7	955155	F	II	ADAP1	Body	opensea	Body-opensea		NA	NA				High-ICI hypermethylated probes
cg11793783	-0.235129717380478	0.480469369679514	-4.47780402904644	4.14033173447276e-05	0.0154846894419333	1.18248123221039	0.644616530869659	0.409486813489181	-0.235129717380478	5	176103447	F	II		IGR	shelf	IGR-shelf	chr5:176107068-176107521	TRUE	NA				High-ICI hypermethylated probes
cg27084654	0.211934212572222	0.488532852855236	4.47584140905381	4.16786231032982e-05	0.0155431768667709	1.17604502021635	0.340578779927459	0.552512992499681	0.211934212572222	3	141118615	F	II	ZBTB38	5'UTR	shelf	5'UTR-shelf	chr3:141120983-141121678	NA	NA		rs11715643		Low-ICI hypermethylated probes
cg19090492	-0.20647619678648	0.510779002298197	-4.47513639083496	4.17779547130903e-05	0.0155431768667709	1.17373328928779	0.654922762318947	0.448446565532467	-0.20647619678648	7	2012873	R	I	MAD1L1	Body	opensea	Body-opensea		NA	NA				High-ICI hypermethylated probes
cg01360115	-0.198536691847553	0.434398343947556	-4.47477012957858	4.18296492292817e-05	0.0155431768667709	1.17253239453325	0.572999430709055	0.374462738861502	-0.198536691847553	22	50747878	R	II		IGR	shore	IGR-shore	chr22:50745415-50746125	NA	NA	low-CpG:49090387-49090452			High-ICI hypermethylated probes
cg04644504	0.108709821818035	0.81559128363869	4.4746032053157	4.18532298039579e-05	0.0155431768667709	1.17198509888411	0.739699521237421	0.848409343055456	0.108709821818035	15	72405733	F	II	SENP8	TSS1500	opensea	TSS1500-opensea		NA	NA		rs28452575		Low-ICI hypermethylated probes
cg09365533	-0.168468803909111	0.379057494569269	-4.47295130960121	4.20872854792959e-05	0.0155698623967427	1.1665695046383	0.496667791637894	0.328198987728782	-0.168468803909111	19	2429209	F	I	LMNB2	3'UTR	shore	3'UTR-shore	chr19:2430281-2430598	NA	NA		rs1049915		High-ICI hypermethylated probes
cg16857548	-0.165103362367875	0.332017785785441	-4.47187160163916	4.2240958074179e-05	0.0155985307450733	1.16303025553166	0.447278623664901	0.282175261297026	-0.165103362367875	18	3011965	R	I	LPIN2	TSS200	shore	TSS200-shore	chr18:3012547-3013173	NA	NA				High-ICI hypermethylated probes
cg25199283	-0.198664409125226	0.333882681341331	-4.47149045836782	4.22953360448553e-05	0.0156045403505454	1.16178097005794	0.472572929221206	0.27390852009598	-0.198664409125226	1	38099265	R	II	RSPO1	5'UTR	shore	5'UTR-shore	chr1:38099677-38100864	NA	TRUE				High-ICI hypermethylated probes
cg00268019	0.305351275398739	0.40846651995486	4.46888829282414	4.26684181099853e-05	0.015690137273544	1.15325302901278	0.195296761657627	0.500648037056366	0.305351275398739	2	160761302	F	I	LY75	TSS200	island	TSS200-island	chr2:160760604-160761452	TRUE	NA	high-CpG:160469442-160469560			Low-ICI hypermethylated probes
cg24516830	0.220023572107379	0.524922382497842	4.46867437278225	4.26992310556729e-05	0.015690137273544	1.15255205788458	0.371321020837973	0.591344592945352	0.220023572107379	1	71694460	R	II		IGR	opensea	IGR-opensea		NA	TRUE				Low-ICI hypermethylated probes
cg26589351	0.136270607587731	0.723620228605278	4.46853785139252	4.2718906882595e-05	0.015690137273544	1.15210471368674	0.628487917647806	0.764758525235537	0.136270607587731	17	47712139	F	II	SPOP	5'UTR	opensea	5'UTR-opensea		NA	TRUE				Low-ICI hypermethylated probes
cg02807192	-0.238803189746616	0.309463122950946	-4.46798409873642	4.2798805944819e-05	0.0157006902834986	1.15029027598324	0.476174783717451	0.237371593970835	-0.238803189746616	17	75524111	R	II		IGR	shore	IGR-shore	chr17:75524589-75525152	NA	NA				High-ICI hypermethylated probes
cg12094965	0.253087022478493	0.396228689447119	4.4675279152475	4.28647366053935e-05	0.0157006902834986	1.14879561037363	0.219545296396095	0.472632318874588	0.253087022478493	12	109749643	F	II		IGR	shore	IGR-shore	chr12:109746826-109748378	NA	NA				Low-ICI hypermethylated probes
cg25283121	-0.216692425321947	0.234166394278795	-4.4673555158272	4.28896787044756e-05	0.0157006902834986	1.14823076869613	0.385442238371475	0.168749813049528	-0.216692425321947	12	132904540	F	II	GALNT9	Body	shore	Body-shore	chr12:132905449-132906206	NA	TRUE		rs28661646		High-ICI hypermethylated probes
cg14206651	0.187317531618589	0.399633428808463	4.46691392363362	4.2953631206663e-05	0.0157006902834986	1.14678400006016	0.268864585980392	0.456182117598981	0.187317531618589	1	41658104	R	II	SCMH1	5'UTR	opensea	5'UTR-opensea		NA	TRUE			rs75057226	Low-ICI hypermethylated probes
cg04561791	-0.143031223008856	0.383600114736318	-4.4668531836647	4.2962434998686e-05	0.0157006902834986	1.14658500539505	0.483452100610425	0.340420877601569	-0.143031223008856	16	85478769	F	II		IGR	opensea	IGR-opensea		TRUE	TRUE		rs75998938		High-ICI hypermethylated probes
cg24158141	-0.132195104813542	0.551075634215183	-4.46648381568816	4.30160099678297e-05	0.0157006902834986	1.14537491773	0.643362782858599	0.511167678045057	-0.132195104813542	4	959998	R	II	DGKQ	Body	shore	Body-shore	chr4:960505-960836	NA	NA				High-ICI hypermethylated probes
cg23701314	-0.159417950725244	0.2286786036915	-4.46559864612344	4.31446647788953e-05	0.015724530991348	1.14247519142846	0.339970380612897	0.180552429887653	-0.159417950725244	15	43387679	R	II	UBR1	Body	opensea	Body-opensea		NA	TRUE				High-ICI hypermethylated probes
cg12924164	0.242108161069282	0.444074254794509	4.46545731245466	4.31652416222204e-05	0.015724530991348	1.14201222018091	0.275055349897085	0.517163510966367	0.242108161069282	7	93587876	R	II		IGR	opensea	IGR-opensea		NA	TRUE				Low-ICI hypermethylated probes
cg24009274	-0.114892592627512	0.527384960460692	-4.46496454459086	4.32370588687497e-05	0.015724530991348	1.14039809549418	0.607592996823294	0.492700404195783	-0.114892592627512	8	125053121	R	II	FER1L6	Body	opensea	Body-opensea		NA	NA				High-ICI hypermethylated probes
cg17254229	-0.168429543699404	0.741820710749556	-4.46453586593045	4.32996304007211e-05	0.015724530991348	1.13899396757048	0.859403599747253	0.690974056047849	-0.168429543699404	2	121336713	R	II		IGR	shore	IGR-shore	chr2:121334308-121334801	NA	NA				High-ICI hypermethylated probes
cg18937934	0.172974617919027	0.588451866347168	4.46384488178426	4.34006750332348e-05	0.015724530991348	1.13673078955275	0.46769600100747	0.640670618926496	0.172974617919027	13	32634615	F	II	FRY	Body	opensea	Body-opensea		NA	TRUE				Low-ICI hypermethylated probes
cg25532627	-0.106235728821802	0.148649723596253	-4.46381464912035	4.34051012929986e-05	0.015724530991348	1.1366317721635	0.222814289000152	0.11657856017835	-0.106235728821802	17	77997833	R	I	TBC1D16	5'UTR	island	5'UTR-island	chr17:77997723-77997951	TRUE	NA				High-ICI hypermethylated probes
cg25364822	-0.189968395271335	0.350525826940319	-4.46380148814554	4.34070282833901e-05	0.015724530991348	1.13658866770681	0.483145272695779	0.293176877424444	-0.189968395271335	1	33337257	R	II	FNDC5	TSS1500	opensea	TSS1500-opensea		TRUE	TRUE				High-ICI hypermethylated probes
cg27483694	-0.384241843660094	0.469849684534202	-4.46366580300702	4.34268997602461e-05	0.015724530991348	1.13614427882541	0.738093990485589	0.353852146825494	-0.384241843660094	16	88937308	F	I		IGR	island	IGR-island	chr16:88937055-88937387	NA	NA				High-ICI hypermethylated probes
cg26325791	-0.372628562183637	0.576172526401774	-4.46275893888805	4.35599406792745e-05	0.0157405627935751	1.13317431887278	0.836309447171483	0.463680884987846	-0.372628562183637	19	18234711	F	I	MAST3	Body	island	Body-island	chr19:18234710-18234912	NA	NA				High-ICI hypermethylated probes
cg03540589	-0.173590223057962	0.43817689010934	-4.46269194690642	4.35697844517046e-05	0.0157405627935751	1.13295493224621	0.559362517527162	0.3857722944692	-0.173590223057962	3	39192364	R	II	CSRNP1	5'UTR	shore	5'UTR-shore	chr3:39194241-39195359	TRUE	TRUE				High-ICI hypermethylated probes
cg27274718	0.278802775469352	0.458901750807693	4.46245928751194	4.36039881806111e-05	0.0157405627935751	1.13219302616289	0.26426585095173	0.543068626421082	0.278802775469352	3	15772890	R	II	ANKRD28	Body	opensea	Body-opensea		NA	NA				Low-ICI hypermethylated probes
cg20699548	0.114611957014418	0.252332185489472	4.46222814428739	4.36379949540118e-05	0.0157405627935751	1.13143610266575	0.172320064554878	0.286932021569296	0.114611957014418	8	71060638	R	II	NCOA2	Body	opensea	Body-opensea		TRUE	NA				Low-ICI hypermethylated probes
cg06999891	0.207934994160494	0.409349432805405	4.46205588347738	4.3663355521997e-05	0.0157405627935751	1.13087201243117	0.26418726707072	0.472122261231214	0.207934994160494	17	2147265	R	II	SMG6	Body	opensea	Body-opensea		NA	TRUE				Low-ICI hypermethylated probes
cg01077724	0.106931292086051	0.758113023468732	4.46025552892256	4.39292690967738e-05	0.0157567914147292	1.1249770985799	0.683462876163375	0.790394168249426	0.106931292086052	1	75590483	F	II		IGR	shore	IGR-shore	chr1:75590817-75591354	NA	NA				Low-ICI hypermethylated probes
cg21961149	-0.335224341349116	0.473933381335392	-4.45965529002267	4.40182754506149e-05	0.0157567914147292	1.12301196718167	0.707957921522511	0.372733580173395	-0.335224341349116	15	37396505	R	II		IGR	shelf	IGR-shelf	chr15:37392601-37392829	NA	NA				High-ICI hypermethylated probes
cg04925511	-0.282504163022056	0.691735881426546	-4.45953430350814	4.40362372138236e-05	0.0157567914147292	1.12261588181041	0.888955768819303	0.606451605797246	-0.282504163022056	7	1468382	R	I		IGR	opensea	IGR-opensea		NA	NA				High-ICI hypermethylated probes
cg12817389	0.20978146251106	0.289102180189517	4.45941030308889	4.40546538433822e-05	0.0157567914147292	1.12220993448527	0.142650970511984	0.352432433023044	0.20978146251106	8	62602522	R	II	ASPH	Body	opensea	Body-opensea		NA	TRUE				Low-ICI hypermethylated probes
cg01108697	-0.269337935321326	0.486799188815652	-4.45877350751463	4.41493496053794e-05	0.0157621870994765	1.12012529920145	0.674827558756955	0.405489623435629	-0.269337935321326	16	1812618	R	I	MAPK8IP3	Body	shore	Body-shore	chr16:1814084-1814482	TRUE	NA				High-ICI hypermethylated probes
cg24908197	-0.298071523603154	0.65366622616484	-4.45872603051083	4.41564177021856e-05	0.0157621870994765	1.11996988220068	0.86175389358591	0.563682369982756	-0.298071523603154	19	5714980	F	II	LONP1	Body	shelf	Body-shelf	chr19:5711703-5711980	NA	NA				High-ICI hypermethylated probes
cg07677570	-0.274224445876293	0.531143083989038	-4.45819001797037	4.42362927159667e-05	0.0157621870994765	1.11821528462891	0.722582791487582	0.448358345611289	-0.274224445876293	19	1732552	F	II		IGR	shore	IGR-shore	chr19:1734221-1734627	NA	NA				High-ICI hypermethylated probes
cg02847674	-0.30092425121374	0.543374828941368	-4.45728779690788	4.43710574503284e-05	0.0157621870994765	1.11526214247803	0.753454023184923	0.452529771971182	-0.30092425121374	1	11905866	F	II	NPPA	3'UTR	opensea	3'UTR-opensea		TRUE	NA			rs61764045	High-ICI hypermethylated probes
cg13050504	-0.318124189871612	0.623309330173823	-4.45724372602608	4.43776505660115e-05	0.0157621870994765	1.11511789686699	0.845396028763438	0.527271838891827	-0.318124189871612	21	43913111	R	I	RSPH1	Body	shelf	Body-shelf	chr21:43916278-43916900	NA	NA			rs34237651	High-ICI hypermethylated probes
cg20420826	-0.118009080038009	0.197522051394822	-4.45495438207937	4.4721459619332e-05	0.0158240880108128	1.10762566391566	0.279905748779848	0.161896668741838	-0.118009080038009	1	116915292	R	II	ATP1A1	TSS1500	island	TSS1500-island	chr1:116915291-116916813	NA	NA				High-ICI hypermethylated probes
cg22233890	-0.209935596144771	0.578768592372478	-4.45427894485641	4.48233908441699e-05	0.0158240880108128	1.10541551858433	0.725327404775431	0.51539180863066	-0.209935596144771	11	36477229	R	II	PRR5L	Body	opensea	Body-opensea		TRUE	TRUE			rs12295908	High-ICI hypermethylated probes
cg26225406	-0.217768280230332	0.744527804702212	-4.45404469702523	4.48587944274005e-05	0.0158240880108128	1.10464905477774	0.89655471731584	0.678786437085508	-0.217768280230332	8	143442764	F	I	TSNARE1	5'UTR	opensea	5'UTR-opensea		NA	NA		rs75838296		High-ICI hypermethylated probes
cg16383503	-0.179281245230947	0.591747429583657	-4.45392399698136	4.48770473522806e-05	0.0158240880108128	1.1042541287236	0.716906034744884	0.537624789513938	-0.179281245230947	16	49802298	R	II	ZNF423	Body	opensea	Body-opensea		NA	NA				High-ICI hypermethylated probes
cg04980712	0.195279703781695	0.605705348445194	4.45377433868277	4.48996895644341e-05	0.0158240880108128	1.10376445896357	0.469378008069294	0.664657711850988	0.195279703781695	3	77149948	F	II	ROBO2	Body	shelf	Body-shelf	chr3:77147167-77147399	NA	NA				Low-ICI hypermethylated probes
cg10525642	-0.239115965899327	0.498583562870483	-4.45228568361527	4.51255198071114e-05	0.0158271010489917	1.09889410041288	0.665513576800201	0.426397610900875	-0.239115965899327	4	7373375	R	II	SORCS2	Body	opensea	Body-opensea		NA	NA				High-ICI hypermethylated probes
cg24463066	0.166480204489486	0.615978480467168	4.45221607405619	4.51361067069386e-05	0.0158271010489917	1.09866638006489	0.499756450917904	0.66623665540739	0.166480204489486	4	48377724	F	II	SLAIN2	Body	opensea	Body-opensea		NA	TRUE				Low-ICI hypermethylated probes
cg18635361	-0.271129238226375	0.5650121599751	-4.45200288420436	4.51685457709459e-05	0.0158271010489917	1.09796896178016	0.754291062133135	0.48316182390676	-0.271129238226376	5	177753258	F	II	COL23A1	Body	opensea	Body-opensea		NA	NA			rs80255274	High-ICI hypermethylated probes
cg13770461	0.187681339869159	0.580390015534958	4.45200177790052	4.51687141659323e-05	0.0158271010489917	1.09796534271371	0.449367193362149	0.637048533231308	0.187681339869159	11	46016312	R	II	PHF21A	Body	opensea	Body-opensea		NA	TRUE				Low-ICI hypermethylated probes
cg09991470	-0.257592537359192	0.565569098382684	-4.45148342586743	4.52476820253397e-05	0.0158271010489917	1.09626969496601	0.745397850878724	0.487805313519532	-0.257592537359192	16	1207623	F	II	CACNA1H	Body	island	Body-island	chr16:1207042-1208032	NA	NA				High-ICI hypermethylated probes
cg24777564	-0.2065811519498	0.569201120634789	-4.45100607867502	4.53205221350351e-05	0.0158271010489917	1.09470826134604	0.713418151241253	0.506836999291453	-0.2065811519498	5	33563927	R	II	ADAMTS12	Body	opensea	Body-opensea		NA	TRUE				High-ICI hypermethylated probes
cg20159193	0.202030908537733	0.42775917356373	4.4504248429333	4.54093693997522e-05	0.0158271010489917	1.0928071024687	0.286718727980784	0.488749636518517	0.202030908537733	6	34352082	R	II	NUDT3	Body	opensea	Body-opensea		NA	TRUE				Low-ICI hypermethylated probes
cg26084700	-0.224092653251793	0.696863210304762	-4.45025099150272	4.54359771919939e-05	0.0158271010489917	1.09223847489003	0.853305251254127	0.629212598002334	-0.224092653251793	2	231693479	R	I		IGR	island	IGR-island	chr2:231692697-231693496	NA	NA				High-ICI hypermethylated probes
cg09478995	-0.250255563491915	0.492102661140097	-4.45017808824093	4.54471394902649e-05	0.0158271010489917	1.09200002823525	0.666809375275963	0.416553811784047	-0.250255563491916	11	57264045	R	II	SLC43A1	Body	shelf	Body-shelf	chr11:57267006-57267316	NA	NA				High-ICI hypermethylated probes
cg14521546	-0.273860304138353	0.354333123071131	-4.45014354393486	4.54524295407284e-05	0.0158271010489917	1.09188704385541	0.545518618413	0.271658314274647	-0.273860304138353	17	81045501	R	I	METRNL	Body	island	Body-island	chr17:81045494-81045941	NA	NA				High-ICI hypermethylated probes
cg06079062	0.273560275878609	0.470396167614893	4.45004164389943	4.54680378208467e-05	0.0158271010489917	1.09155376075315	0.279420125963788	0.552980401842397	0.273560275878609	3	108672412	F	II	GUCA1C	1stExon	opensea	1stExon-opensea		NA	NA				Low-ICI hypermethylated probes
cg15997315	-0.222892183403829	0.528302205535136	-4.44975465076469	4.5512025369732e-05	0.0158271010489917	1.09061511440835	0.683906182628375	0.461013999224547	-0.222892183403829	12	124392362	R	II	DNAH10	Body	opensea	Body-opensea		NA	TRUE				High-ICI hypermethylated probes
cg09377704	-0.236053847579063	0.503364762657352	-4.44960016736978	4.55357202812921e-05	0.0158271010489917	1.09010986865894	0.668157071344622	0.432103223765559	-0.236053847579063	19	7936683	F	I		IGR	shore	IGR-shore	chr19:7937049-7937615	NA	NA				High-ICI hypermethylated probes
cg22800007	-0.161888723337656	0.49303706994057	-4.44940779129655	4.55652440547395e-05	0.0158271010489917	1.0894807039435	0.606053725855538	0.444165002517882	-0.161888723337656	14	101992418	F	II		IGR	shore	IGR-shore	chr14:101992722-101992932	NA	NA		rs61992230		High-ICI hypermethylated probes
cg21245875	-0.155707262346355	0.359187953623072	-4.44702413663387	4.59326137534881e-05	0.0159007604226635	1.08168598504812	0.467889249978074	0.312181987631719	-0.155707262346355	15	70354825	R	II	TLE3	Body	opensea	Body-opensea		TRUE	NA				High-ICI hypermethylated probes
cg02212009	-0.239311404789776	0.571370125900905	-4.446657396505	4.59893916959207e-05	0.0159069692767429	1.08048688469427	0.738436578301315	0.499125173511539	-0.239311404789777	11	12820860	R	II	TEAD1	Body	opensea	Body-opensea		NA	TRUE				High-ICI hypermethylated probes
cg04089674	-0.247456553833026	0.534286046054933	-4.44585924017571	4.61131972955652e-05	0.0159294347266321	1.07787737076659	0.707038734579876	0.45958218074685	-0.247456553833026	1	37055042	R	II		IGR	opensea	IGR-opensea		NA	TRUE				High-ICI hypermethylated probes
cg06077079	0.176326044203563	0.449037325701811	4.44573732229941	4.61321371189759e-05	0.0159294347266321	1.0774787876058	0.325941785408758	0.502267829612321	0.176326044203563	2	232527265	F	II		IGR	island	IGR-island	chr2:232526666-232527777	NA	NA				Low-ICI hypermethylated probes
cg16452865	-0.282933497762685	0.409235119238683	-4.44480362184929	4.62774383342293e-05	0.0159527055650367	1.07442642547532	0.606754730884331	0.323821233121646	-0.282933497762685	17	75523939	F	II		IGR	shore	IGR-shore	chr17:75524589-75525152	NA	NA			rs79156135	High-ICI hypermethylated probes
cg02184644	-0.199293780802341	0.536544973951165	-4.44444321338056	4.63336439315098e-05	0.0159586474892309	1.07324829012824	0.67567459451129	0.476380813708949	-0.199293780802341	7	150677125	R	II		IGR	shore	IGR-shore	chr7:150675206-150675866	NA	TRUE				High-ICI hypermethylated probes
cg02488934	-0.150674348933739	0.701227363544416	-4.44310601914249	4.65427613159354e-05	0.0159903279116357	1.06887752403752	0.80641511657363	0.655740767639891	-0.150674348933739	1	156422580	R	II		IGR	shelf	IGR-shelf	chr1:156426549-156427362	NA	NA			rs74443292	High-ICI hypermethylated probes
cg24819967	-0.131476404027641	0.679128162644563	-4.44223467960607	4.66795209282026e-05	0.0160238704841937	1.06602977209542	0.770913576777068	0.639437172749426	-0.131476404027641	10	135190860	R	II		IGR	shore	IGR-shore	chr10:135191594-135193307	NA	NA				High-ICI hypermethylated probes
cg03808027	0.192023095823035	0.616455449023936	4.44126871753667	4.68315899195373e-05	0.0160586329781272	1.0628730629015	0.48240158967578	0.674424685498814	0.192023095823035	3	197770149	R	II	LMLN	Body	opensea	Body-opensea		NA	NA				Low-ICI hypermethylated probes
cg17315281	-0.213907080704356	0.441482300473228	-4.44097000590075	4.68787130679075e-05	0.0160586329781272	1.06189695251283	0.590813658700797	0.376906577996441	-0.213907080704356	4	7193783	F	I	SORCS2	TSS1500	shore	TSS1500-shore	chr4:7194537-7195467	NA	NA				High-ICI hypermethylated probes
cg16024886	-0.277943224096535	0.637492129356381	-4.4408451296777	4.68984265757e-05	0.0160586329781272	1.06148889886321	0.831527965046415	0.55358474094988	-0.277943224096535	14	102693874	F	II		IGR	shore	IGR-shore	chr14:102695455-102695804	TRUE	NA				High-ICI hypermethylated probes
cg15526671	-0.10807853472671	0.223990149538632	-4.4395282381611	4.71068096216942e-05	0.0160896274538231	1.0571860518576	0.299441202083693	0.191362667356984	-0.10807853472671	12	31080052	R	II	TSPAN11	5'UTR	shore	5'UTR-shore	chr12:31079243-31079878	TRUE	TRUE				High-ICI hypermethylated probes
cg05912053	-0.222135513121127	0.66238820707579	-4.43907402534609	4.71788928246025e-05	0.0160988267257713	1.05570207733771	0.817463942650916	0.595328429529789	-0.222135513121127	15	60919520	R	II	RORA	Body	opensea	Body-opensea		NA	NA				High-ICI hypermethylated probes
cg02712949	0.208321217871926	0.681318432893173	4.43879635902497	4.72230112078652e-05	0.0160988267257713	1.05479493756404	0.53588663928447	0.744207857156396	0.208321217871926	8	87570714	R	II	CPNE3	3'UTR	opensea	3'UTR-opensea		NA	NA				Low-ICI hypermethylated probes
cg18563630	-0.218239217011657	0.712997312963947	-4.43770612674833	4.73966275783598e-05	0.0160988267257713	1.05123337962457	0.865352992764538	0.647113775752881	-0.218239217011657	19	7699121	F	II	PCP2	TSS1500	shelf	TSS1500-shelf	chr19:7701661-7702336	NA	NA			rs8104879	High-ICI hypermethylated probes
cg20439347	0.290644001456905	0.474644469304769	4.43683415919796	4.7535933772379e-05	0.0160988267257713	1.04838512892604	0.271742053193345	0.56238605465025	0.290644001456905	11	126763487	R	II	KIRREL3	Body	opensea	Body-opensea		NA	NA				Low-ICI hypermethylated probes
cg11524248	-0.158509311595586	0.662944557242969	-4.43682385684688	4.75375820679556e-05	0.0160988267257713	1.04835147816797	0.773602001187058	0.615092689591471	-0.158509311595587	5	149545907	F	II	CDX1	TSS1500	shore	TSS1500-shore	chr5:149546027-149546988	NA	NA				High-ICI hypermethylated probes
cg25218470	0.238174694956891	0.478110391890544	4.4366439957327	4.75663674208193e-05	0.0160988267257713	1.04776400016803	0.311837491637621	0.550012186594511	0.238174694956891	5	125759767	F	II	GRAMD3	Body	shore	Body-shore	chr5:125759047-125759298	NA	NA				Low-ICI hypermethylated probes
cg09303330	-0.236839110754094	0.633285746518271	-4.43557386732662	4.77379847671871e-05	0.0160988267257713	1.04426887489197	0.798626257799431	0.561787147045337	-0.236839110754094	7	791718	R	II	HEATR2	Body	shore	Body-shore	chr7:791984-792238	NA	NA				High-ICI hypermethylated probes
cg25987417	0.141328198113584	0.678556596034278	4.43533415836245	4.77765097763923e-05	0.0160988267257713	1.04348601808689	0.579893514332342	0.721221712445926	0.141328198113584	4	76823448	R	II	PPEF2	1stExon	opensea	1stExon-opensea		NA	NA				Low-ICI hypermethylated probes
cg25302888	-0.220180219819227	0.527661993052457	-4.43524600644475	4.77906848021052e-05	0.0160988267257713	1.04319813071842	0.681372712548898	0.461192492729671	-0.220180219819227	7	150779154	R	II	FASTK	TSS1500	island	TSS1500-island	chr7:150777607-150780879	NA	NA				High-ICI hypermethylated probes
cg24754956	-0.182718362996047	0.546096559621687	-4.43472819112034	4.78740335007487e-05	0.0160988267257713	1.04150709642444	0.673654662090625	0.490936299094578	-0.182718362996047	19	1729851	F	II		IGR	shelf	IGR-shelf	chr19:1725415-1726154	NA	NA				High-ICI hypermethylated probes
cg02329430	0.213018319164381	0.546173276170081	4.43411035560064	4.797366714035e-05	0.0160988267257713	1.03948954133536	0.397462374111928	0.610480693276309	0.213018319164381	15	73921385	R	II	NPTN	Body	shelf	Body-shelf	chr15:73925033-73925925	NA	NA				Low-ICI hypermethylated probes
cg24399924	-0.303517657908684	0.380316355778988	-4.43366412302454	4.80457533997191e-05	0.0160988267257713	1.03803243790212	0.592206041488824	0.288688383580139	-0.303517657908684	2	85980533	R	I	ATOH8	TSS1500	island	TSS1500-island	chr2:85980499-85982198	NA	NA				High-ICI hypermethylated probes
cg02876925	-0.157141385511222	0.258906523192862	-4.43300265920239	4.81528033648742e-05	0.0161034736793613	1.03587265142679	0.368608999870508	0.211467614359285	-0.157141385511222	4	77869590	R	II	SEPT11	TSS1500	island	TSS1500-island	chr4:77869440-77872122	NA	NA				High-ICI hypermethylated probes
cg25510609	0.321854609640521	0.466000210015433	4.43266567146303	4.82074301667052e-05	0.0161034736793613	1.03477238760897	0.241309256115446	0.563163865755967	0.321854609640521	15	86233236	F	I	AKAP13	Body	opensea	Body-opensea		NA	TRUE	low-CpG:84034147-84034259			Low-ICI hypermethylated probes
cg22082350	-0.169730423998022	0.618058362042598	-4.43241335789297	4.82483705664021e-05	0.0161034736793613	1.03394860928994	0.736549412758199	0.566818988760177	-0.169730423998022	4	4385026	R	II		IGR	shelf	IGR-shelf	chr4:4387593-4389919	NA	NA				High-ICI hypermethylated probes
cg13410000	0.155807379105908	0.597653693589709	4.431891269357	4.83331923328516e-05	0.0161186473316803	1.03224410993105	0.488882504402566	0.644689883508474	0.155807379105908	15	91357521	F	II	BLM	Body	opensea	Body-opensea		NA	TRUE		rs28363369		Low-ICI hypermethylated probes
cg21218957	0.266470264711568	0.425460322359021	4.43079826171185	4.85112402817102e-05	0.0161648610151405	1.02867598310553	0.239433911145285	0.505904175856853	0.266470264711568	13	49976473	F	II	CAB39L	5'UTR	opensea	5'UTR-opensea		NA	NA				Low-ICI hypermethylated probes
cg27083825	-0.332534161265879	0.693672897846337	-4.42998889645088	4.86434956127606e-05	0.0161957529953751	1.02603406296056	0.925819387786667	0.593285226520789	-0.332534161265879	6	158453594	R	I	SYNJ2	Body	opensea	Body-opensea		NA	TRUE				High-ICI hypermethylated probes
cg23606669	-0.155710309761648	0.530013037421483	-4.42925802061435	4.87632273100432e-05	0.0162092608988415	1.02364853373208	0.63871646121735	0.483006151455702	-0.155710309761648	1	20250308	R	II	PLA2G2E	TSS200	opensea	TSS200-opensea		NA	NA				High-ICI hypermethylated probes
cg17152101	0.293591424648777	0.463759458655628	4.42867410493313	4.88590905137287e-05	0.0162148038101501	1.02174279987168	0.258799407485727	0.552390832134504	0.293591424648777	1	32509371	F	II	KHDRBS1	3'UTR	opensea	3'UTR-opensea		NA	NA		rs12405056		Low-ICI hypermethylated probes
cg12065138	-0.199300837944788	0.491619576586696	-4.42841496139831	4.89016937372882e-05	0.0162158016432848	1.0208970657122	0.630754123831171	0.431453285886383	-0.199300837944788	1	4771201	R	II	AJAP1	Body	shore	Body-shore	chr1:4771652-4772545	TRUE	NA				High-ICI hypermethylated probes
cg20064006	-0.199166558990004	0.662849372373868	-4.42771708965772	4.90166041075408e-05	0.0162398244204375	1.01861962035917	0.801890177706512	0.602723618716508	-0.199166558990004	1	942329	R	II		IGR	opensea	IGR-opensea		TRUE	NA				High-ICI hypermethylated probes
cg25947619	0.329775771542077	0.491339153591527	4.42643656974247	4.92281374288065e-05	0.0162613137071206	1.01444117271604	0.261118331948945	0.590894103491022	0.329775771542077	15	86233220	F	I	AKAP13	Body	opensea	Body-opensea		NA	TRUE	low-CpG:84034147-84034259			Low-ICI hypermethylated probes
cg09778828	-0.1156659409168	0.21833022163509	-4.42620779677155	4.92660227863548e-05	0.0162613137071206	1.01369472401518	0.299078142652479	0.183412201735679	-0.1156659409168	9	132245624	R	II		IGR	island	IGR-island	chr9:132244401-132245732	NA	NA				High-ICI hypermethylated probes
cg02321112	-0.126207082406746	0.191319510777617	-4.42580659203709	4.93325319106866e-05	0.0162613137071206	1.01238570074065	0.279426341891761	0.153219259485015	-0.126207082406746	7	156810523	F	II		IGR	shore	IGR-shore	chr7:156810572-156814593	NA	NA				High-ICI hypermethylated probes
cg21099148	-0.107886974684177	0.25424429057295	-4.42513298967299	4.94443942665503e-05	0.0162613137071206	1.01018803751898	0.329561612522281	0.221674637838104	-0.107886974684177	17	36611691	F	II		IGR	shore	IGR-shore	chr17:36609705-36610320	TRUE	TRUE		rs12452522		High-ICI hypermethylated probes
cg20140377	0.157232608739139	0.438208381108749	4.42509566750372	4.94505994298411e-05	0.0162613137071206	1.01006627638565	0.328442220290859	0.485674829029998	0.157232608739139	1	165545110	R	II	LOC400794	Body	opensea	Body-opensea		NA	NA				Low-ICI hypermethylated probes
cg09181104	-0.147547664575701	0.391157017798055	-4.42484993523492	4.9491473700986e-05	0.0162613137071206	1.00926460251552	0.494161991181092	0.34661432660539	-0.147547664575701	1	38129247	F	II		IGR	opensea	IGR-opensea		NA	TRUE				High-ICI hypermethylated probes
cg17301311	-0.134276760794163	0.273894126171637	-4.4247453004048	4.950888830042e-05	0.0162613137071206	1.0089232492553	0.367634506348695	0.233357745554531	-0.134276760794163	17	48641896	F	II	CACNA1G	Body	shelf	Body-shelf	chr17:48636103-48639279	TRUE	TRUE				High-ICI hypermethylated probes
cg07217499	-0.190457196722464	0.691558079616709	-4.4236138258095	4.96975840418052e-05	0.0162982198791318	1.00523223930519	0.82451876412107	0.634061567398607	-0.190457196722464	12	2416339	R	II	CACNA1C	Body	opensea	Body-opensea		NA	TRUE				High-ICI hypermethylated probes
cg17997363	-0.161668924365173	0.385201617749247	-4.42355502360885	4.97074096126636e-05	0.0162982198791318	1.00504043090512	0.498064829098518	0.336395904733345	-0.161668924365173	10	123353337	R	II	FGFR2	1stExon	shelf	1stExon-shelf	chr10:123356616-123358285	NA	NA				High-ICI hypermethylated probes
cg07937271	0.154706445285785	0.721333456978072	4.42283987904501	4.98270585832799e-05	0.0163113317293176	1.00270777470546	0.613330844231392	0.768037289517177	0.154706445285785	4	13542719	R	II	NKX3-2	3'UTR	shore	3'UTR-shore	chr4:13543562-13546494	NA	TRUE				Low-ICI hypermethylated probes
cg11421956	-0.181451196724213	0.574459470595152	-4.42196680476981	4.99735110291069e-05	0.0163143151661202	0.99986021473629	0.701132947553565	0.519681750829352	-0.181451196724214	11	60689415	R	II	TMEM109	Body	shelf	Body-shelf	chr11:60691785-60692532	NA	NA				High-ICI hypermethylated probes
cg18483289	0.188253137788866	0.490805109460107	4.42174191900811	5.00113020459894e-05	0.0163143151661202	0.999126783674968	0.359383107607502	0.547636245396368	0.188253137788867	20	644897	F	II	SCRT2	Body	island	Body-island	chr20:643975-645233	NA	NA			rs13038311	Low-ICI hypermethylated probes
cg17441401	-0.269224864353195	0.322065938065706	-4.42153659593392	5.00458299727981e-05	0.0163143151661202	0.998457168087808	0.510015371670766	0.240790507317572	-0.269224864353195	1	53794150	R	I	LRP8	TSS1500	shore	TSS1500-shore	chr1:53791687-53793496	NA	NA				High-ICI hypermethylated probes
cg10316527	-0.248655745673256	0.321174755563379	-4.4213620851788	5.00751946489676e-05	0.0163143151661202	0.997888051075626	0.494764615750369	0.246108870077113	-0.248655745673256	15	82242305	F	II		IGR	opensea	IGR-opensea		NA	TRUE				High-ICI hypermethylated probes
cg18833928	0.119575525192468	0.728064377064518	4.42075123708871	5.0178113545013e-05	0.0163348506578975	0.995896024333805	0.644587123628267	0.764162648820735	0.119575525192468	7	38357684	R	II		IGR	opensea	IGR-opensea		NA	TRUE				Low-ICI hypermethylated probes
cg06829791	-0.183311665511952	0.438078572181194	-4.42041520281705	5.02348182557832e-05	0.016340321033374	0.994800241477633	0.566050866972557	0.382739201460605	-0.183311665511952	1	208257939	R	II	PLXNA2	Body	opensea	Body-opensea		NA	TRUE				High-ICI hypermethylated probes
cg20276780	0.134034780714491	0.817368112433098	4.41955138100673	5.03808722756833e-05	0.0163686406631069	0.99198355535307	0.723796661745623	0.857831442460114	0.134034780714491	1	41303356	R	II	KCNQ4	Body	island	Body-island	chr1:41303355-41304436	NA	NA				Low-ICI hypermethylated probes
cg12621303	-0.216170478509272	0.375170359935437	-4.41942768601476	5.04018203390696e-05	0.0163686406631069	0.991580240260244	0.526081826064551	0.30991134755528	-0.216170478509272	11	117664470	R	II	DSCAML1	Body	shelf	Body-shelf	chr11:117666634-117668141	NA	NA				High-ICI hypermethylated probes
cg18786479	-0.123946106577349	0.144911588807277	-4.41896208423887	5.04807473500308e-05	0.0163771115525764	0.990062162931417	0.231440002832973	0.107493896255624	-0.123946106577349	1	167425134	R	I	CD247	Body	island	Body-island	chr1:167424088-167425216	TRUE	NA				High-ICI hypermethylated probes
cg17016678	-0.269526648632189	0.374318475068428	-4.41866114567941	5.05318253803666e-05	0.0163771115525764	0.989081002394914	0.562478588264484	0.292951939632295	-0.269526648632189	8	335522	F	II		IGR	opensea	IGR-opensea		NA	TRUE				High-ICI hypermethylated probes
cg03899412	-0.184186966008837	0.406160672414965	-4.41781921559414	5.06749932031617e-05	0.0163923596102038	0.986336188770548	0.534744026043776	0.350557060034939	-0.184186966008837	5	3325319	R	II		IGR	shore	IGR-shore	chr5:3326328-3326645	NA	NA				High-ICI hypermethylated probes
cg08289839	-0.239516746091455	0.626029609294226	-4.41756408333832	5.07184557310418e-05	0.0163934698513896	0.985504467497731	0.793239413169393	0.553722667077937	-0.239516746091455	13	111318640	R	II	CARS2	Body	opensea	Body-opensea		NA	NA				High-ICI hypermethylated probes
cg07692489	-0.15795543018596	0.177757333464957	-4.41531407399507	5.1103328000805e-05	0.016462136082012	0.978170465457782	0.28802810548157	0.13007267529561	-0.15795543018596	16	8960972	F	II	CARHSP1	5'UTR	shore	5'UTR-shore	chr16:8962189-8963190	NA	NA				High-ICI hypermethylated probes
cg01597629	-0.188336733069919	0.344784444708872	-4.41514777444144	5.11318868553383e-05	0.016462136082012	0.977628472058689	0.476264805531268	0.287928072461349	-0.18833673306992	16	6953997	R	II	A2BP1	5'UTR	opensea	5'UTR-opensea		NA	TRUE				High-ICI hypermethylated probes
cg26817935	0.307512523026901	0.585932284360744	4.41442468682417	5.12562446891e-05	0.0164892104183412	0.975271936342323	0.371253730549512	0.678766253576412	0.307512523026901	5	58571800	F	II	PDE4D	Body	opensea	Body-opensea		NA	TRUE	low-CpG:58607190-58607675			Low-ICI hypermethylated probes
cg08124000	-0.246857150745786	0.590011467532209	-4.41383808912488	5.13573453024942e-05	0.0164898587026757	0.973360348437336	0.762345704845305	0.515488554099519	-0.246857150745786	11	3187750	R	II	OSBPL5	TSS1500	shore	TSS1500-shore	chr11:3186131-3186768	NA	NA				High-ICI hypermethylated probes
cg00600916	-0.240726887321509	0.525260079535979	-4.41365952706394	5.13881591976235e-05	0.0164898587026757	0.972778478320893	0.693314698986843	0.452587811665335	-0.240726887321509	7	158800547	R	II	LOC154822	TSS1500	shore	TSS1500-shore	chr7:158798591-158799434	NA	NA			rs73169204	High-ICI hypermethylated probes
cg24090911	-0.196809971104476	0.582828725739881	-4.41363958655305	5.13916013874654e-05	0.0164898587026757	0.972713499964871	0.720224365944892	0.523414394840417	-0.196809971104476	5	400732	F	II	AHRR	Body	opensea	Body-opensea		TRUE	TRUE				High-ICI hypermethylated probes
cg20676317	-0.254899864343958	0.638939053567928	-4.41347904498085	5.14193227373032e-05	0.0164898587026757	0.972190362376309	0.816888015468427	0.561988151124469	-0.254899864343958	10	135080434	R	II	ADAM8	Body	shore	Body-shore	chr10:135082109-135082406	NA	NA				High-ICI hypermethylated probes
cg09762582	-0.203356155244718	0.376605651725861	-4.41205822245108	5.16652979482352e-05	0.0165299084433976	0.967560874174532	0.518571269538211	0.315215114293493	-0.203356155244718	21	45624178	F	I		IGR	shore	IGR-shore	chr21:45622218-45622500	NA	TRUE		rs8129121		High-ICI hypermethylated probes
cg21919992	-0.162019372593311	0.622378222847644	-4.41055722098362	5.19263996460068e-05	0.0166004767692667	0.962670871935374	0.735486086733541	0.573466714140229	-0.162019372593311	19	48988943	F	II	LMTK3	3'UTR	shore	3'UTR-shore	chr19:48988310-48988525	NA	NA				High-ICI hypermethylated probes
cg06657050	-0.151699128441244	0.190357905955284	-4.40886135014449	5.22229467314003e-05	0.0166471645690673	0.957146927500351	0.296261071093511	0.144561942652267	-0.151699128441244	15	53083587	R	II	ONECUT1	TSS1500	island	TSS1500-island	chr15:53080458-53083699	NA	TRUE				High-ICI hypermethylated probes
cg17508274	-0.136983811179392	0.505058809041066	-4.40879239866771	5.22350387307559e-05	0.0166471645690673	0.956922352892062	0.600689016845548	0.463705205666155	-0.136983811179392	5	133341912	F	II	VDAC1	TSS1500	shore	TSS1500-shore	chr5:133339600-133341509	NA	NA				High-ICI hypermethylated probes
cg22853542	-0.166380176269811	0.382063478207927	-4.4085546655245	5.22767508469069e-05	0.0166475028517344	0.956148069484326	0.498215676735908	0.331835500466097	-0.166380176269811	8	128812713	R	II	PVT1	Body	opensea	Body-opensea		NA	TRUE				High-ICI hypermethylated probes
cg16753939	-0.181500897705055	0.688635499669284	-4.4074508243385	5.2470854012765e-05	0.0166860081239827	0.95255316956153	0.815343673538851	0.633842775833796	-0.181500897705055	11	624457	R	II	MUPCDH	Body	shore	Body-shore	chr11:624780-625053	TRUE	NA				High-ICI hypermethylated probes
cg04653308	-0.123285104070888	0.463366188193909	-4.40740370595609	5.24791550809709e-05	0.0166860081239827	0.952399727357077	0.549433147639624	0.426148043568736	-0.123285104070888	9	131872018	F	II	CRAT	Body	shore	Body-shore	chr9:131872624-131873959	NA	NA				High-ICI hypermethylated probes
cg03274401	0.201777852323649	0.66622816878225	4.40668080243346	5.26066729831458e-05	0.0166946112900489	0.950045667176329	0.525364385084609	0.727142237408257	0.201777852323648	8	17017479	F	II	ZDHHC2	Body	shelf	Body-shelf	chr8:17013436-17014790	NA	NA				Low-ICI hypermethylated probes
cg13779795	-0.100650284589466	0.247983139841724	-4.40591294931844	5.2742450581434e-05	0.0166946112900489	0.947545425499738	0.318248432857012	0.217598148267546	-0.100650284589467	9	139943636	F	II	ENTPD2	Body	island	Body-island	chr9:139943099-139943715	NA	NA				High-ICI hypermethylated probes
cg18460675	-0.305562971339998	0.622172697943183	-4.40548434781488	5.28183876056746e-05	0.0166946112900489	0.946149922647193	0.835490243972994	0.529927272632995	-0.305562971339999	6	160581828	F	II		IGR	opensea	IGR-opensea		NA	TRUE		rs80282126		High-ICI hypermethylated probes
cg00978427	0.159860801818204	0.666099677749936	4.40532018263726	5.28475016132645e-05	0.0166946112900489	0.945615426231632	0.554498740631568	0.714359542449771	0.159860801818204	5	140736762	F	II	PCDHGA2	Body	shore	Body-shore	chr5:140736821-140737058	NA	NA				Low-ICI hypermethylated probes
cg24422900	-0.233845206225984	0.322273138272138	-4.40514769344909	5.28781086989017e-05	0.0166946112900489	0.945053837881802	0.485523565260089	0.251678359034105	-0.233845206225984	19	19753746	F	II	GMIP	Body	shore	Body-shore	chr19:19754284-19754507	NA	NA		rs73924828		High-ICI hypermethylated probes
cg23380496	-0.254294674543658	0.687814071804269	-4.40495736001869	5.29119021784505e-05	0.0166946112900489	0.944434164052905	0.865340542712105	0.611045868168448	-0.254294674543658	19	3831859	R	II	ZFR2	Body	shore	Body-shore	chr19:3831363-3831807	NA	NA				High-ICI hypermethylated probes
cg25619638	-0.138744724848569	0.343730800492195	-4.40442857718352	5.30058974588345e-05	0.0166946112900489	0.94271265501042	0.440590325386479	0.30184560053791	-0.138744724848569	2	220310232	F	II	SPEG	Body	shore	Body-shore	chr2:220309637-220309893	NA	NA				High-ICI hypermethylated probes
cg15487251	-0.239318805016863	0.43910444998805	-4.40416091562038	5.30535384066628e-05	0.0166946112900489	0.941841290011095	0.606176068584728	0.366857263567865	-0.239318805016863	3	185544216	R	II	IGF2BP2	TSS1500	shore	TSS1500-shore	chr3:185541048-185544146	NA	NA				High-ICI hypermethylated probes
cg07837520	0.280820375012379	0.567149674034017	4.40406017721599	5.30714795910864e-05	0.0166946112900489	0.941513345091406	0.371105261289526	0.651925636301905	0.280820375012379	16	19871730	R	II	GPRC5B	3'UTR	opensea	3'UTR-opensea		NA	TRUE				Low-ICI hypermethylated probes
cg16259494	-0.191382872176001	0.282373575063737	-4.40395729793257	5.30898081617798e-05	0.0166946112900489	0.941178434252104	0.415980485828115	0.224597613652114	-0.191382872176001	14	23614419	F	II	SLC7A8	5'UTR	opensea	5'UTR-opensea		NA	NA				High-ICI hypermethylated probes
cg00006397	-0.263557482473928	0.479403031682216	-4.40378644135513	5.3120260931667e-05	0.0166946112900489	0.940622239565699	0.663395991145147	0.399838508671219	-0.263557482473928	1	160336699	F	II	NHLH1	TSS200	shelf	TSS200-shelf	chr1:160340604-160340843	NA	NA				High-ICI hypermethylated probes
cg17719126	-0.180218384284753	0.776244191383619	-4.40365270007969	5.31441103010807e-05	0.0166946112900489	0.940186874316209	0.902057025695617	0.721838641410864	-0.180218384284753	6	33383819	R	I	PHF1	Body	shore	Body-shore	chr6:33385678-33386262	NA	NA				High-ICI hypermethylated probes
cg04208329	-0.257053148821634	0.595409712742398	-4.40357223641216	5.31584639857391e-05	0.0166946112900489	0.93992494547667	0.774861910976369	0.517808762154735	-0.257053148821634	14	75445376	R	II		IGR	shelf	IGR-shelf	chr14:75447511-75447779	NA	NA				High-ICI hypermethylated probes
cg09949366	0.291564656233511	0.731984199240559	4.40280111352269	5.32962141435331e-05	0.0167250462784249	0.937414863058396	0.528439061869995	0.820003718103505	0.291564656233511	6	12957651	R	I	PHACTR1	Body	opensea	Body-opensea		NA	TRUE	low-CpG:13065524-13066228			Low-ICI hypermethylated probes
cg18662080	0.262198829738221	0.649906452016003	4.40234870029096	5.33771931943397e-05	0.0167376327872168	0.935942305687536	0.46686198597234	0.72906081571056	0.262198829738221	13	29057716	R	II	FLT1	Body	opensea	Body-opensea		NA	TRUE				Low-ICI hypermethylated probes
cg09400316	0.248373062978728	0.626436200859313	4.40177003580796	5.34809451893087e-05	0.0167452492396378	0.934058914203052	0.453043685194918	0.701416748173646	0.248373062978728	6	12957697	R	II	PHACTR1	Body	opensea	Body-opensea		NA	TRUE	low-CpG:13065524-13066228			Low-ICI hypermethylated probes
cg21635706	-0.247890208337738	0.726229908367236	-4.40168720227393	5.3495812947901e-05	0.0167452492396378	0.933789323376742	0.899285336829431	0.651395128491693	-0.247890208337738	15	69432565	R	II	MIR548H4	Body	opensea	Body-opensea		NA	TRUE				High-ICI hypermethylated probes
cg07732644	-0.214105216203931	0.465885792895434	-4.40152938591465	5.35241504927304e-05	0.0167452492396378	0.933275699110109	0.61535547213214	0.40125025592821	-0.214105216203931	17	3378397	R	II	ASPA	TSS1500	shelf	TSS1500-shelf	chr17:3375006-3375237	NA	NA				High-ICI hypermethylated probes
cg20820622	-0.177198691006051	0.335739780758268	-4.40054283630252	5.37016274180796e-05	0.0167708953038543	0.930065095177945	0.459444527309663	0.282245836303611	-0.177198691006051	15	70354647	F	II	TLE3	Body	opensea	Body-opensea		TRUE	NA				High-ICI hypermethylated probes
cg05525368	-0.221043460510062	0.533835959853792	-4.4003954094418	5.37281982143334e-05	0.0167708953038543	0.929585340811252	0.688149319077798	0.467105858567735	-0.221043460510063	1	43825904	R	II	CDC20	Body	shore	Body-shore	chr1:43824134-43825059	NA	NA				High-ICI hypermethylated probes
cg15973075	-0.31845484044041	0.512736820480396	-4.40003597824172	5.37930323336956e-05	0.0167708953038543	0.92841571566436	0.735054350599173	0.416599510158763	-0.31845484044041	5	12355075	R	II		IGR	opensea	IGR-opensea		NA	TRUE				High-ICI hypermethylated probes
cg02897824	-0.164311528925519	0.489198687925182	-4.39973684348938	5.38470483158994e-05	0.0167708953038543	0.927442334389489	0.603906736420356	0.439595207494837	-0.164311528925519	1	201159685	F	II	IGFN1	TSS1500	opensea	TSS1500-opensea		NA	TRUE				High-ICI hypermethylated probes
cg21191461	-0.184495282753246	0.759658616322629	-4.39929519472211	5.3926895273735e-05	0.0167708953038543	0.926005269166573	0.888457209942819	0.703961927189574	-0.184495282753246	9	100846886	F	II	TRIM14	3'UTR	shelf	3'UTR-shelf	chr9:100849699-100850392	NA	NA				High-ICI hypermethylated probes
cg08665844	-0.262276546583512	0.499425705757638	-4.39895442327078	5.39885831762767e-05	0.0167708953038543	0.924896489990787	0.682524426957448	0.420247880373936	-0.262276546583513	4	113485177	F	II	C4orf21	Body	opensea	Body-opensea		NA	NA				High-ICI hypermethylated probes
cg20981219	-0.177910034667528	0.632984719147463	-4.39838570735317	5.40916877345985e-05	0.0167708953038543	0.923046127668999	0.75718606410404	0.579276029436511	-0.177910034667528	14	77385200	R	II		IGR	opensea	IGR-opensea		NA	TRUE				High-ICI hypermethylated probes
cg13601309	-0.189415231072207	0.667786192779963	-4.39821717299304	5.41222787740368e-05	0.0167708953038543	0.922497808717323	0.80001946730207	0.610604236229863	-0.189415231072207	18	77443784	R	II	CTDP1	Body	shelf	Body-shelf	chr18:77439094-77440398	NA	NA				High-ICI hypermethylated probes
cg15400629	0.201972867371728	0.343197955971688	4.397804953328	5.41971727271361e-05	0.0167708953038543	0.921156710970441	0.202198029693313	0.40417089706504	0.201972867371728	4	13548243	F	II	LOC285548	Body	shore	Body-shore	chr4:13548570-13549956	NA	NA				Low-ICI hypermethylated probes
cg00113096	-0.294470634580641	0.452836122547232	-4.39631380625022	5.44689354713504e-05	0.0167708953038543	0.91630595593199	0.658409961782774	0.363939327202133	-0.294470634580641	2	134119805	F	II	NCKAP5	Body	opensea	Body-opensea		NA	TRUE				High-ICI hypermethylated probes
cg22112000	-0.276599411129927	0.343756371693056	-4.3962662005481	5.44776334853331e-05	0.0167708953038543	0.916151105233753	0.536854073802628	0.260254662672701	-0.276599411129927	7	5647182	R	I		IGR	island	IGR-island	chr7:5647104-5647340	NA	TRUE				High-ICI hypermethylated probes
cg21346154	-0.292568169883531	0.639637627108939	-4.39608166561071	5.45113625645055e-05	0.0167708953038543	0.915550861599551	0.843883330612536	0.551315160729005	-0.292568169883531	2	70699808	F	II	TGFA	Body	opensea	Body-opensea		NA	TRUE				High-ICI hypermethylated probes
cg16532262	-0.260276507677287	0.514906320345387	-4.3959336810726	5.45384257059873e-05	0.0167708953038543	0.915069515111523	0.696608787969154	0.436332280291867	-0.260276507677287	12	53190908	R	II	KRT3	TSS1500	opensea	TSS1500-opensea		NA	NA				High-ICI hypermethylated probes
cg01704924	-0.163492230777019	0.341188912249116	-4.39582729560091	5.45578893749417e-05	0.0167708953038543	0.914723481683143	0.455324997885903	0.291832767108884	-0.163492230777019	12	54446996	F	I	HOXC4	5'UTR	shore	5'UTR-shore	chr12:54447744-54448091	TRUE	TRUE		rs2277372		High-ICI hypermethylated probes
cg12426870	0.123168961389529	0.460576327239496	4.39579856002299	5.45631478305445e-05	0.0167708953038543	0.914630015905861	0.374590448533599	0.497759409923128	0.123168961389529	1	59282482	R	II		IGR	shore	IGR-shore	chr1:59280240-59280490	NA	NA				Low-ICI hypermethylated probes
cg10314807	0.125146979537123	0.752037958906527	4.39503455248673	5.47031383423987e-05	0.0167708953038543	0.912145095660754	0.664671199607026	0.789818179144149	0.125146979537123	11	73375804	F	II		IGR	shelf	IGR-shelf	chr11:73371800-73372632	NA	NA		rs77977434		Low-ICI hypermethylated probes
cg04521765	-0.166417170868867	0.673879014872468	-4.3949004415037	5.47277478273969e-05	0.0167708953038543	0.911708922535184	0.790057039818659	0.623639868949791	-0.166417170868867	10	100028929	R	II	LOXL4	TSS1500	shore	TSS1500-shore	chr10:100028204-100028508	NA	TRUE				High-ICI hypermethylated probes
cg10069323	-0.142753428900476	0.510763873829106	-4.3948799815882	5.47315031884363e-05	0.0167708953038543	0.911642380679679	0.610421927967174	0.467668499066698	-0.142753428900476	11	18747783	F	II	IGSF22	TSS200	opensea	TSS200-opensea		NA	NA				High-ICI hypermethylated probes
cg04017512	-0.234036247266492	0.569868017312645	-4.394851802678	5.47366757607108e-05	0.0167708953038543	0.911550734541996	0.733251812574159	0.499215565307667	-0.234036247266492	10	35195138	F	II		IGR	opensea	IGR-opensea		NA	TRUE				High-ICI hypermethylated probes
cg08641990	-0.245927689360071	0.51079705047447	-4.39421737272965	5.48532590500002e-05	0.0167708953038543	0.90948745201161	0.682482418518293	0.436554729158222	-0.245927689360071	1	54822503	F	II	SSBP3	Body	shore	Body-shore	chr1:54821990-54822333	NA	NA				High-ICI hypermethylated probes
cg14986671	-0.25776508856369	0.643404452573198	-4.39331218031344	5.50200168078633e-05	0.0167708953038543	0.906543835795977	0.823353665344076	0.565588576780386	-0.25776508856369	10	131667008	R	I	EBF3	Body	shore	Body-shore	chr10:131666016-131666315	NA	TRUE				High-ICI hypermethylated probes
cg03857384	-0.272910345529168	0.590369306042425	-4.39322222472098	5.50366157042543e-05	0.0167708953038543	0.906251322250147	0.780891622732599	0.507981277203431	-0.272910345529168	11	3187777	F	I	OSBPL5	TSS1500	shore	TSS1500-shore	chr11:3186131-3186768	NA	NA				High-ICI hypermethylated probes
cg21781706	-0.103233662453643	0.185240350446648	-4.39294501772375	5.50877975259708e-05	0.0167708953038543	0.905349930224458	0.257309133669002	0.154075471215359	-0.103233662453643	1	6438350	F	I	ACOT7	Body	opensea	Body-opensea		NA	NA				High-ICI hypermethylated probes
cg13545633	-0.233448751769983	0.324194827307958	-4.39278507094903	5.51173502264067e-05	0.0167708953038543	0.904829844255103	0.487168484203983	0.253719732434001	-0.233448751769982	17	75524350	R	II		IGR	shore	IGR-shore	chr17:75524589-75525152	NA	NA				High-ICI hypermethylated probes
cg03173807	-0.147574524599227	0.750449909348143	-4.39263572354129	5.5144958471395e-05	0.0167708953038543	0.904344231199995	0.853473634068358	0.705899109469131	-0.147574524599228	4	1348578	F	II	KIAA1530	Body	opensea	Body-opensea		NA	NA				High-ICI hypermethylated probes
cg18227986	-0.135089668335542	0.619245788772782	-4.39232062401975	5.52032517339452e-05	0.0167708953038543	0.903319688844941	0.713553670440991	0.578464002105449	-0.135089668335542	19	40325405	R	II	FBL	Body	shore	Body-shore	chr19:40323907-40325005	NA	NA				High-ICI hypermethylated probes
cg04912982	-0.141059392076749	0.189640629485729	-4.39086986560116	5.54724168502288e-05	0.016781171049159	0.898602998474094	0.288116054143082	0.147056662066333	-0.141059392076749	10	131742124	R	II	EBF3	Body	opensea	Body-opensea		NA	NA			rs80037546	High-ICI hypermethylated probes
cg05834639	-0.144900945077854	0.580973884003151	-4.39086941238265	5.54725011371729e-05	0.016781171049159	0.898601525086195	0.682131147548068	0.537230202470214	-0.144900945077854	16	87885208	R	II	SLC7A5	Body	opensea	Body-opensea		NA	NA				High-ICI hypermethylated probes
cg01015175	0.121135707254692	0.677861152290988	4.39064854953997	5.55135907752622e-05	0.016781171049159	0.897883520672994	0.59329471515092	0.714430422405612	0.121135707254692	11	112045641	F	II	BCO2	TSS1500	opensea	TSS1500-opensea		NA	TRUE				Low-ICI hypermethylated probes
cg06785060	-0.170711258896819	0.345002329699802	-4.39054764543459	5.55323729861844e-05	0.016781171049159	0.897555496374616	0.464178114212676	0.293466855315857	-0.170711258896819	1	42180981	F	II	HIVEP3	5'UTR	opensea	5'UTR-opensea		NA	TRUE				High-ICI hypermethylated probes
cg25457886	0.117158003499582	0.877821210743337	4.39047043426591	5.5546749193794e-05	0.016781171049159	0.89730449663181	0.796031661130422	0.913189664630004	0.117158003499582	3	14339565	R	I		IGR	island	IGR-island	chr3:14339249-14339574	NA	TRUE				Low-ICI hypermethylated probes
cg23646888	0.124694289219648	0.706907308695805	4.39037302162624	5.55648919547467e-05	0.016781171049159	0.896987828388771	0.619856578485863	0.74455086770551	0.124694289219648	3	112929672	R	II		IGR	shore	IGR-shore	chr3:112930437-112931506	NA	NA				Low-ICI hypermethylated probes
cg27512659	-0.23227792543615	0.359342962793694	-4.38965153214781	5.56994466863299e-05	0.0168094116460324	0.894642516114447	0.521499250362327	0.289221324926177	-0.23227792543615	10	4697405	R	II	LOC100216001	Body	opensea	Body-opensea		NA	NA				High-ICI hypermethylated probes
cg15859864	-0.156434792662313	0.701704512743636	-4.3892599397506	5.57726098663075e-05	0.016819097075191	0.893369658755646	0.8109137076211	0.654478914958787	-0.156434792662313	14	101992750	F	II		IGR	island	IGR-island	chr14:101992722-101992932	NA	NA				High-ICI hypermethylated probes
cg03116740	-0.13574401260262	0.590931705251013	-4.3881672615853	5.59772559237216e-05	0.0168609951127536	0.889818221482934	0.685696393294352	0.549952380691732	-0.13574401260262	11	841335	R	II	TSPAN4	TSS1500	shore	TSS1500-shore	chr11:842293-843396	NA	NA				High-ICI hypermethylated probes
cg11324957	0.298849771145527	0.667757259112004	4.38807862319393	5.59938889187618e-05	0.0168609951127536	0.889530145537351	0.459126286802862	0.757976057948389	0.298849771145527	15	53086857	R	I		IGR	island	IGR-island	chr15:53086629-53086858	NA	NA				Low-ICI hypermethylated probes
cg04549679	-0.21705200485315	0.454828174699447	-4.38655333810555	5.62808641621088e-05	0.0169225236247076	0.884573366212851	0.606355046012023	0.389303041158873	-0.21705200485315	1	3524425	R	I	MEGF6	Body	shelf	Body-shelf	chr1:3527619-3528078	NA	NA			rs12096227	High-ICI hypermethylated probes
cg19795150	-0.172963674602188	0.612298994323657	-4.38529326112335	5.65190221402115e-05	0.0169607560910476	0.880479039586267	0.733047219989336	0.560083545387147	-0.172963674602188	2	241081288	F	II	OTOS	TSS1500	opensea	TSS1500-opensea		NA	NA				High-ICI hypermethylated probes
cg06578111	-0.150260628458924	0.619696512101872	-4.38447146695816	5.6674872127263e-05	0.0169652123574199	0.877809101301092	0.724595441403385	0.574334812944462	-0.150260628458924	3	13546418	F	II	HDAC11	3'UTR	opensea	3'UTR-opensea		TRUE	NA				High-ICI hypermethylated probes
cg21141089	-0.156655059358452	0.26175806603241	-4.38435013375796	5.66979179264274e-05	0.0169652123574199	0.87741491964261	0.371121031999631	0.214465972641179	-0.156655059358452	17	46949704	R	II		IGR	opensea	IGR-opensea		NA	TRUE				High-ICI hypermethylated probes
cg26246947	-0.133198575676515	0.574004790256581	-4.38427161675027	5.67128361639154e-05	0.0169652123574199	0.877159839904478	0.666992475162827	0.533793899486312	-0.133198575676515	1	45191110	R	II	C1orf228	3'UTR	shore	3'UTR-shore	chr1:45189705-45190558	NA	NA				High-ICI hypermethylated probes
cg08722638	-0.17507633542821	0.75717197406454	-4.38332742304294	5.68925327956619e-05	0.0169774777440059	0.874092583387395	0.879395076155931	0.704318740727722	-0.17507633542821	2	43035419	R	II		IGR	shore	IGR-shore	chr2:43036978-43037638	NA	NA				High-ICI hypermethylated probes
cg24636244	-0.243691144856555	0.375037398631923	-4.38318518683255	5.69196508708118e-05	0.0169774777440059	0.873630548798	0.545161405418575	0.30147026056202	-0.243691144856555	10	6221185	R	II	PFKFB3	Body	opensea	Body-opensea		NA	NA				High-ICI hypermethylated probes
cg17419461	-0.134063318321001	0.383293400106808	-4.38277438662904	5.69980427934864e-05	0.0169780620985829	0.872296159961571	0.4768847732743	0.342821454953299	-0.134063318321002	1	204415978	F	II	PIK3C2B	Body	opensea	Body-opensea		TRUE	TRUE		rs3122288		High-ICI hypermethylated probes
cg27109657	-0.233641458003961	0.430324017578106	-4.38238254709713	5.70729145020672e-05	0.0169780620985829	0.871023413914675	0.593432205241248	0.359790747237287	-0.233641458003961	16	86909402	R	II		IGR	shelf	IGR-shelf	chr16:86912403-86912670	NA	NA				High-ICI hypermethylated probes
cg26534812	-0.276855544196163	0.364578677903609	-4.38230657910461	5.70874413584209e-05	0.0169780620985829	0.870776665981311	0.55785518988961	0.280999645693447	-0.276855544196163	17	75524155	R	II		IGR	shore	IGR-shore	chr17:75524589-75525152	NA	NA				High-ICI hypermethylated probes
cg02917889	-0.149161528452843	0.481920940487756	-4.38184108134852	5.71765341028787e-05	0.0169922186538574	0.869264748269395	0.586052573558609	0.436891045105766	-0.149161528452842	2	131791737	R	II	ARHGEF4	Body	shore	Body-shore	chr2:131792237-131793189	NA	NA		rs73000361		High-ICI hypermethylated probes
cg23599820	0.143831424369924	0.294126222158574	4.3807551961895	5.73848911350115e-05	0.01702914835326	0.865738124125991	0.193715605145608	0.337547029515532	0.143831424369924	17	73456199	F	II	KIAA0195	5'UTR	shelf	5'UTR-shelf	chr17:73452534-73452898	NA	NA				Low-ICI hypermethylated probes
cg25949002	0.163728344505285	0.731749565950648	4.38028845459859	5.74746755008516e-05	0.01702914835326	0.864222412948236	0.617448646201676	0.78117699070696	0.163728344505285	6	32301073	F	II	C6orf10	Body	opensea	Body-opensea		NA	NA				Low-ICI hypermethylated probes
cg24504854	-0.197845934678771	0.463903971119719	-4.3802864861099	5.74750544572047e-05	0.01702914835326	0.864216020573791	0.602022831178484	0.404176896499713	-0.197845934678771	7	195679	F	II	FAM20C	Body	island	Body-island	chr7:195474-195988	NA	NA			rs61730252	High-ICI hypermethylated probes
cg02706919	-0.197421310992655	0.475194583546698	-4.38002394510394	5.7525618388714e-05	0.01702914835326	0.863363469498217	0.613017008201948	0.415595697209293	-0.197421310992655	3	43688971	R	II		IGR	opensea	IGR-opensea		NA	TRUE				High-ICI hypermethylated probes
cg27480241	-0.120442290726374	0.287274669652491	-4.37972027578206	5.75841574522112e-05	0.01702914835326	0.862377391450527	0.371357023555809	0.250914732829434	-0.120442290726374	2	179310165	F	II	PRKRA	Body	opensea	Body-opensea		NA	NA				High-ICI hypermethylated probes
cg17812123	-0.24860386265003	0.7502684723461	-4.37906944518705	5.77098151515351e-05	0.0170394158325505	0.860264113629337	0.923822112309329	0.675218249659299	-0.24860386265003	15	101696922	F	II		IGR	opensea	IGR-opensea		NA	NA				High-ICI hypermethylated probes
cg05198900	-0.261097660034131	0.518651522328357	-4.37847533270951	5.78247552996874e-05	0.0170402017359902	0.858335128194359	0.700927247257845	0.439829587223714	-0.261097660034131	11	625023	F	I	MUPCDH	TSS200	island	TSS200-island	chr11:624780-625053	NA	NA				High-ICI hypermethylated probes
cg00759420	-0.198172212226715	0.313987548239336	-4.37847101881181	5.78255907041195e-05	0.0170402017359902	0.858321122118268	0.452334186963646	0.254161974736931	-0.198172212226715	6	170239089	F	II		IGR	island	IGR-island	chr6:170239046-170239297	NA	NA				High-ICI hypermethylated probes
cg11445155	0.215920461246139	0.39143373894954	4.37794531943178	5.79274826589775e-05	0.0170402017359902	0.856614363813914	0.240696813173934	0.456617274420073	0.215920461246139	5	87777157	R	II		IGR	opensea	IGR-opensea		NA	TRUE				Low-ICI hypermethylated probes
cg14228614	0.20321677000978	0.518603494702709	4.37765671294419	5.79834952022056e-05	0.0170402017359902	0.855677401578018	0.376735183563806	0.579951953573586	0.20321677000978	8	58909645	F	II	FAM110B	5'UTR	shore	5'UTR-shore	chr8:58907001-58907822	TRUE	NA				Low-ICI hypermethylated probes
cg08320703	-0.105331486517862	0.705999040006783	-4.37737009247594	5.80391745125708e-05	0.0170402017359902	0.854746915062813	0.77953234191548	0.674200855397617	-0.105331486517862	4	2792582	R	II		IGR	shore	IGR-shore	chr4:2794494-2794875	NA	NA				High-ICI hypermethylated probes
cg04329105	-0.117855734607061	0.298741874428709	-4.37720806061238	5.80706740983606e-05	0.0170402017359902	0.854220906179726	0.381018519343072	0.263162784736011	-0.117855734607061	14	59932321	R	II	GPR135	TSS1500	shore	TSS1500-shore	chr14:59930634-59932251	TRUE	NA				High-ICI hypermethylated probes
cg12056772	-0.146540692975228	0.594403325167965	-4.37709638544547	5.80923938515847e-05	0.0170402017359902	0.853858376957262	0.696705318377086	0.550164625401859	-0.146540692975228	17	76989482	F	II	CANT1	3'UTR	shore	3'UTR-shore	chr17:76989642-76990039	TRUE	TRUE				High-ICI hypermethylated probes
cg25329734	-0.194182247563858	0.389189055103538	-4.3770231577194	5.81066402401607e-05	0.0170402017359902	0.853620661325938	0.524750246799061	0.330567999235203	-0.194182247563858	17	63160487	R	II	RGS9	Body	opensea	Body-opensea		NA	TRUE				High-ICI hypermethylated probes
cg12045881	-0.120187209043335	0.644231071478631	-4.37668584110512	5.8172308841262e-05	0.0170402017359902	0.852525670299811	0.728135349490016	0.607948140446681	-0.120187209043335	15	101926872	R	II	PCSK6	Body	opensea	Body-opensea		NA	NA				High-ICI hypermethylated probes
cg14341014	0.25088999330092	0.348100096166789	4.37626337115754	5.82546570164165e-05	0.0170402017359902	0.851154310816095	0.172950478201996	0.423840471502916	0.25088999330092	6	131461133	F	II		IGR	shelf	IGR-shelf	chr6:131456364-131457157	NA	NA				Low-ICI hypermethylated probes
cg18320737	-0.225425366866492	0.443563348463832	-4.37604769458957	5.82967406320236e-05	0.0170402017359902	0.850454236901689	0.600935774389496	0.375510407523004	-0.225425366866492	1	205491518	R	II	CDK18	5'UTR	opensea	5'UTR-opensea		NA	NA				High-ICI hypermethylated probes
cg03739470	-0.105647892307095	0.454725098628794	-4.37570700917551	5.83632767789432e-05	0.0170402017359902	0.849348423691581	0.528479287597898	0.422831395290803	-0.105647892307096	8	144746992	R	II		IGR	opensea	IGR-opensea		NA	NA				High-ICI hypermethylated probes
cg11790074	-0.185752519320539	0.641037092527258	-4.3755636730031	5.83912925555008e-05	0.0170402017359902	0.848883188040058	0.770713379600087	0.584960860279548	-0.185752519320539	14	23573850	R	II		IGR	opensea	IGR-opensea		NA	TRUE				High-ICI hypermethylated probes
cg04164048	-0.26857177757016	0.608440896265522	-4.37541768754388	5.84198396129434e-05	0.0170402017359902	0.848409360630382	0.795934401361672	0.527362623791512	-0.268571777570161	16	70680498	R	II	IL34	1stExon	opensea	1stExon-opensea		NA	NA				High-ICI hypermethylated probes
cg27485108	0.143973145879333	0.799465289017878	4.37472226151555	5.85560149985263e-05	0.0170604449559883	0.846152304769109	0.6989557343474	0.842928880226733	0.143973145879333	2	26951130	F	I	KCNK3	Body	island	Body-island	chr2:26950538-26951474	NA	NA				Low-ICI hypermethylated probes
cg17973661	-0.115768625708659	0.31353555536363	-4.3741094753324	5.86762644107095e-05	0.0170604449559883	0.844163599385017	0.39435516199043	0.278586536281771	-0.115768625708659	15	68097052	R	II	MAP2K5	Body	opensea	Body-opensea		NA	TRUE			rs72751449	High-ICI hypermethylated probes
cg21852513	-0.109459018492499	0.187429664988806	-4.3740012058062	5.86975355483841e-05	0.0170604449559883	0.84381224025226	0.263844451483569	0.15438543299107	-0.109459018492499	1	116371475	R	II		IGR	shore	IGR-shore	chr1:116370810-116371303	TRUE	TRUE				High-ICI hypermethylated probes
cg21894124	-0.141162368445581	0.2024510115865	-4.37345037263114	5.88058711735927e-05	0.0170696087485503	0.842024723849188	0.300998325407	0.159835956961419	-0.141162368445581	12	132904689	R	II	GALNT9	Body	shore	Body-shore	chr12:132905449-132906206	NA	TRUE				High-ICI hypermethylated probes
cg15370732	0.10677839249444	0.810774706596692	4.37340175453242	5.8815442531132e-05	0.0170696087485503	0.841866957557957	0.736231300515667	0.843009693010107	0.10677839249444	17	47892591	F	II	MYST2	Body	opensea	Body-opensea		NA	TRUE				Low-ICI hypermethylated probes
cg27087553	-0.245397147829476	0.326894406302822	-4.3728423014648	5.89256902962247e-05	0.0170696087485503	0.84005158401233	0.498209396296985	0.252812248467509	-0.245397147829476	6	1180553	F	II		IGR	opensea	IGR-opensea		NA	NA				High-ICI hypermethylated probes
cg14881601	-0.146526335252175	0.250407118130707	-4.37278258023295	5.89374710529982e-05	0.0170696087485503	0.839857800447013	0.352699088023735	0.20617275277156	-0.146526335252175	19	42905440	R	II		IGR	shore	IGR-shore	chr19:42905723-42906350	NA	NA				High-ICI hypermethylated probes
cg03107987	-0.172597507981443	0.495439872128045	-4.37198367701097	5.90952854344206e-05	0.0170829869352265	0.837265634993373	0.615932472039618	0.443334964058176	-0.172597507981443	19	3481960	F	II	C19orf77	TSS1500	island	TSS1500-island	chr19:3481782-3482048	TRUE	NA				High-ICI hypermethylated probes
cg05279229	-0.312860170092337	0.654560168439854	-4.37172427972322	5.91466149190831e-05	0.0170829869352265	0.836424027168886	0.872971985296769	0.560111815204432	-0.312860170092337	7	1896384	F	I	MAD1L1	Body	island	Body-island	chr7:1896090-1896451	NA	NA		rs4236274		High-ICI hypermethylated probes
cg08999742	-0.204816427530964	0.486960797573752	-4.37170455876743	5.91505190736393e-05	0.0170829869352265	0.836360043976373	0.629945850755746	0.425129423224781	-0.204816427530964	16	88933068	F	I	PABPN1L	TSS200	shelf	TSS200-shelf	chr16:88937055-88937387	NA	NA		rs59556256		High-ICI hypermethylated probes
cg04137143	-0.133523963739113	0.577496691749326	-4.37074179891749	5.934142202357e-05	0.0171058972729633	0.833236602096085	0.67071153435965	0.537187570620537	-0.133523963739113	9	132249914	F	II		IGR	shore	IGR-shore	chr9:132250466-132251123	NA	NA				High-ICI hypermethylated probes
cg13686789	-0.309211806550272	0.602021108032597	-4.37067264720136	5.9355156998288e-05	0.0171058972729633	0.833012268253094	0.817885954114863	0.508674147564591	-0.309211806550272	9	72655401	R	II		IGR	shelf	IGR-shelf	chr9:72658836-72659277	NA	NA				High-ICI hypermethylated probes
cg23732483	0.149131116559941	0.61279874313651	4.36993298764671	5.95022626427659e-05	0.0171224083038144	0.830612854290446	0.508688341009759	0.6578194575697	0.149131116559941	3	48965611	F	II	ARIH2	Body	opensea	Body-opensea		NA	TRUE				Low-ICI hypermethylated probes
cg27261397	-0.256426597874495	0.634107376316444	-4.36975417354719	5.95378789738178e-05	0.0171224083038144	0.830032819517297	0.813122171059015	0.556695573184521	-0.256426597874495	11	625833	F	I	MUPCDH	TSS1500	shore	TSS1500-shore	chr11:626728-628037	NA	TRUE		rs3758651	rs73402945	High-ICI hypermethylated probes
cg01197763	-0.121366273122819	0.689050282680658	-4.36924702808962	5.96390055883887e-05	0.0171274357661925	0.828387807434329	0.773777680898475	0.652411407775656	-0.121366273122819	1	858362	R	II		IGR	shore	IGR-shore	chr1:858970-861632	NA	NA				High-ICI hypermethylated probes
cg05203809	-0.273862588380049	0.439020823615223	-4.36874499766703	5.97392770037872e-05	0.0171322038895329	0.826759473557519	0.630207913616389	0.35634532523634	-0.273862588380049	16	12281858	F	II	SNX29	Body	opensea	Body-opensea		NA	TRUE				High-ICI hypermethylated probes
cg18026235	-0.108862218748108	0.186464610181608	-4.36770668451759	5.99471823352561e-05	0.0171797969160448	0.823391982448611	0.262462762892552	0.153600544144443	-0.108862218748108	1	38549430	F	II		IGR	opensea	IGR-opensea		NA	TRUE				High-ICI hypermethylated probes
cg04726374	-0.220814558008265	0.562757061600071	-4.36728661706838	6.0031494076983e-05	0.0171919284219375	0.822029710920209	0.716910620964332	0.496096062956067	-0.220814558008265	17	40554519	F	II	PTRF	3'UTR	shelf	3'UTR-shelf	chr17:40556632-40557537	NA	TRUE				High-ICI hypermethylated probes
cg20583640	-0.315453883137261	0.629963133628229	-4.36612819813427	6.02645991457048e-05	0.0172225542426685	0.818273291561213	0.850185655818393	0.534731772681131	-0.315453883137261	4	1585454	R	II		IGR	shelf	IGR-shelf	chr4:1580673-1582096	NA	NA			rs11735323	High-ICI hypermethylated probes
cg26999725	-0.207667218023385	0.351760714801174	-4.36406984171223	6.06809724253135e-05	0.0172552471508647	0.811599769227828	0.496735942477877	0.289068724454492	-0.207667218023385	6	170562191	F	II		IGR	shelf	IGR-shelf	chr6:170564873-170565152	NA	NA				High-ICI hypermethylated probes
cg12502265	-0.258056276048733	0.563269302662098	-4.36402268189733	6.06905448704624e-05	0.0172552471508647	0.811446886565272	0.743421797262156	0.485365521213424	-0.258056276048733	10	131667950	R	II	EBF3	Body	shore	Body-shore	chr10:131666016-131666315	NA	TRUE			rs77996920	High-ICI hypermethylated probes
cg16791797	-0.177470651538041	0.474532152015459	-4.36349217011231	6.07983289113599e-05	0.0172552471508647	0.809727126351217	0.598426757806167	0.420956106268126	-0.177470651538041	12	132931179	F	II		IGR	shore	IGR-shore	chr12:132930013-132930247	NA	NA				High-ICI hypermethylated probes
cg16613233	0.201406839798921	0.694123020388717	4.36331642195811	6.08340767395854e-05	0.0172552471508647	0.809157424815546	0.553518245434754	0.754925085233674	0.20140683979892	16	84604908	F	II	COTL1	Body	opensea	Body-opensea		NA	NA				Low-ICI hypermethylated probes
cg23906641	-0.150777543523399	0.280498011303534	-4.36324439355886	6.08487334965566e-05	0.0172552471508647	0.808923942129465	0.385757805838737	0.234980262315338	-0.150777543523399	12	53496020	R	II	SOAT2	TSS1500	opensea	TSS1500-opensea		NA	NA		rs35114651		High-ICI hypermethylated probes
cg24862131	-0.271183738981518	0.486903073209208	-4.36298078316693	6.09024037983215e-05	0.0172552471508647	0.808069454611814	0.67622002306423	0.405036284082712	-0.271183738981518	7	6680085	F	I		IGR	shelf	IGR-shelf	chr7:6676454-6676785	TRUE	NA				High-ICI hypermethylated probes
cg12659114	-0.304030511647941	0.36839925944684	-4.36255683325993	6.09888154541489e-05	0.0172552471508647	0.806695280002081	0.580646975125591	0.276616463477651	-0.304030511647941	17	75524062	R	II		IGR	shore	IGR-shore	chr17:75524589-75525152	NA	NA				High-ICI hypermethylated probes
cg04988794	-0.141741409166776	0.370581290865313	-4.36217766818103	6.10661999681717e-05	0.0172552471508647	0.805466321483951	0.469532840660986	0.327791431494211	-0.141741409166776	1	3130485	R	II	PRDM16	Body	opensea	Body-opensea		NA	NA			rs79209444	High-ICI hypermethylated probes
cg19005446	-0.116813980947352	0.781150351796151	-4.36204441455473	6.10934186508893e-05	0.0172552471508647	0.805034428515811	0.862699734721661	0.745885753774309	-0.116813980947352	22	28035309	F	II		IGR	island	IGR-island	chr22:28034987-28035310	NA	NA				High-ICI hypermethylated probes
cg00174743	-0.199148891533224	0.710848037377021	-4.36203974983253	6.10943716914336e-05	0.0172552471508647	0.805019309632807	0.849876508824744	0.65072761729152	-0.199148891533224	21	47812611	R	II	PCNT	Body	shore	Body-shore	chr21:47813251-47813462	NA	NA				High-ICI hypermethylated probes
cg26175815	0.109385642090043	0.778124411223892	4.36120009556851	6.12661559101702e-05	0.0172719590952235	0.802298018679482	0.701760849764805	0.811146491854848	0.109385642090043	3	129420294	F	II	TMCC1	Body	opensea	Body-opensea		NA	TRUE				Low-ICI hypermethylated probes
cg09816018	-0.190929543657371	0.326923112302165	-4.3610946931893	6.12877533015152e-05	0.0172719590952235	0.801956430267983	0.46021354844033	0.269284004782958	-0.190929543657371	6	30080295	R	II	TRIM31	Body	opensea	Body-opensea		NA	NA				High-ICI hypermethylated probes
cg04022097	-0.231299660064193	0.45558162744867	-4.36092197385438	6.13231602497887e-05	0.0172719590952235	0.801396689080689	0.617054975040654	0.385755314976461	-0.231299660064193	1	3133811	R	II	PRDM16	Body	opensea	Body-opensea		NA	NA				High-ICI hypermethylated probes
cg03078551	-0.183347731430292	0.407106607436358	-4.36044841173902	6.14203412768283e-05	0.0172874410183741	0.799862042523665	0.535104080321656	0.351756348891364	-0.183347731430292	17	41656298	F	II		IGR	opensea	IGR-opensea		NA	TRUE		rs7216851		High-ICI hypermethylated probes
cg08352439	0.210605286538887	0.632362972880661	4.36017329235259	6.14768681599565e-05	0.0172914669712049	0.798970513760977	0.485336640768608	0.695941927307494	0.210605286538887	7	55637123	F	II	VOPP1	Body	shelf	Body-shelf	chr7:55639277-55640599	NA	TRUE		rs80246326		Low-ICI hypermethylated probes
cg12853656	-0.169134049443879	0.694152996626001	-4.3594086998049	6.16342298720883e-05	0.0173238295282065	0.79649297613438	0.812227710388709	0.643093660944831	-0.169134049443879	7	179032	R	II		IGR	island	IGR-island	chr7:178517-179127	NA	NA				High-ICI hypermethylated probes
cg11995437	-0.235277721476122	0.369324700688897	-4.35759955835282	6.20081350489859e-05	0.017393111995939	0.790631549137506	0.533575185492982	0.29829746401686	-0.235277721476122	19	11484869	F	II	C19orf39	TSS1500	shore	TSS1500-shore	chr19:11485286-11485769	NA	NA				High-ICI hypermethylated probes
cg12069379	0.139282507143123	0.590728031880643	4.35718474215233	6.20941781518606e-05	0.0173945675667038	0.78928774734123	0.493493074063745	0.632775581206868	0.139282507143123	10	105681711	F	I		IGR	shelf	IGR-shelf	chr10:105677555-105678040	NA	NA		rs74154705	rs77530283	Low-ICI hypermethylated probes
cg18226539	-0.143882429734205	0.622417553091359	-4.35716500962527	6.20982740595737e-05	0.0173945675667038	0.789223825072374	0.722863777622785	0.57898134788858	-0.143882429734205	11	2189713	R	II	TH	Body	shore	Body-shore	chr11:2187488-2188245	NA	NA			rs77068614	High-ICI hypermethylated probes
cg08104146	-0.25005109391662	0.542033860377087	-4.35661971476169	6.2211565803191e-05	0.0174143907704153	0.787457430050156	0.716597831601896	0.466546737685277	-0.25005109391662	15	93208920	R	II		IGR	opensea	IGR-opensea		NA	TRUE				High-ICI hypermethylated probes
cg27382409	-0.183973205087783	0.467518130508617	-4.35567805674345	6.24076809082889e-05	0.0174573551445683	0.784407321588847	0.595952254815183	0.411979049727399	-0.183973205087784	10	47088062	R	II	PPYR1	3'UTR	opensea	3'UTR-opensea		NA	NA				High-ICI hypermethylated probes
cg27123351	-0.179629652422642	0.682792350964153	-4.35541383224606	6.24628178833738e-05	0.0174608518474447	0.783551531432958	0.808194183787507	0.628564531364865	-0.179629652422642	11	67442249	F	II	ALDH3B2	5'UTR	opensea	5'UTR-opensea		NA	TRUE				High-ICI hypermethylated probes
cg13924015	-0.246163651140714	0.553313870207721	-4.35346046873633	6.28719095172422e-05	0.0174990881663697	0.777225577933023	0.725163966287087	0.479000315146373	-0.246163651140714	9	107911118	F	II		IGR	opensea	IGR-opensea		NA	TRUE				High-ICI hypermethylated probes
cg17153382	-0.21470656572278	0.731926556423191	-4.35333292414303	6.28987116346612e-05	0.0174990881663697	0.776812571484549	0.881816045701358	0.667109479978578	-0.21470656572278	8	59570327	F	II	NSMAF	Body	shore	Body-shore	chr8:59571603-59572526	NA	NA				High-ICI hypermethylated probes
cg14285881	-0.178562941367915	0.675277510884506	-4.3525446066725	6.30646150588443e-05	0.0175333330255182	0.774260018718619	0.799934658631919	0.621371717264004	-0.178562941367915	9	139952218	F	II		IGR	shelf	IGR-shelf	chr9:139947906-139948937	NA	NA				High-ICI hypermethylated probes
cg16353800	-0.289757830136605	0.586714455650714	-4.35219196518504	6.3138967207961e-05	0.017537443362377	0.773118243634724	0.788998223859288	0.499240393722683	-0.289757830136605	18	72917943	R	II	ZADH2	Body	shore	Body-shore	chr18:72919914-72921785	NA	NA				High-ICI hypermethylated probes
cg23825231	-0.23275476020396	0.488542177884579	-4.35108334091035	6.33732697115953e-05	0.0175833344525141	0.769529043397626	0.651031350102437	0.418276589898478	-0.232754760203959	17	45054460	F	II		IGR	shore	IGR-shore	chr17:45055317-45056838	NA	NA				High-ICI hypermethylated probes
cg22049038	0.222976116122989	0.332849837315359	4.35081107285034	6.34309416301164e-05	0.0175848016366541	0.768647633347462	0.177187265682329	0.400163381805318	0.222976116122989	7	146332766	R	II	CNTNAP2	Body	opensea	Body-opensea		NA	TRUE				Low-ICI hypermethylated probes
cg03416645	-0.181481994420501	0.248138638048531	-4.35065305483877	6.34644364923711e-05	0.0175848016366541	0.768136095326839	0.374833615285485	0.193351620864984	-0.181481994420501	3	105087206	F	II	ALCAM	Body	shore	Body-shore	chr3:105088072-105088339	NA	NA				High-ICI hypermethylated probes
cg13458384	-0.155097212930152	0.645237206702396	-4.3499551652333	6.36125732807793e-05	0.0176139301456284	0.765876981002084	0.753512619502691	0.598415406572539	-0.155097212930151	9	136567339	R	II	SARDH	Body	shore	Body-shore	chr9:136567684-136568146	NA	TRUE				High-ICI hypermethylated probes
cg23731742	-0.286112658758825	0.543826844164848	-4.34948940436328	6.37116247579814e-05	0.0176175333157576	0.764369376281123	0.74356587009082	0.457453211331995	-0.286112658758825	1	879958	R	I	NOC2L	3'UTR	shore	3'UTR-shore	chr1:875730-878363	NA	TRUE				High-ICI hypermethylated probes
cg12059866	-0.123650160700585	0.614849503704513	-4.34892067752071	6.38327772225603e-05	0.0176272298886354	0.762528586422435	0.701171314004921	0.577521153304337	-0.123650160700585	14	100617223	F	II	DEGS2	Body	shore	Body-shore	chr14:100615540-100615946	NA	NA				High-ICI hypermethylated probes
cg07603357	-0.139764822432948	0.699935335959869	-4.34732990676556	6.41728418251899e-05	0.017685361521738	0.757380356288622	0.797507004450796	0.657742182017847	-0.139764822432949	19	34016072	F	I		IGR	shelf	IGR-shelf	chr19:34012271-34012936	NA	NA				High-ICI hypermethylated probes
cg06256596	-0.187238842779957	0.293952225828695	-4.34670392885695	6.43071423096042e-05	0.0177104551186839	0.755354736791232	0.424666134939231	0.237427292159275	-0.187238842779957	16	66511944	R	II	BEAN	Body	opensea	Body-opensea		NA	NA				High-ICI hypermethylated probes
cg22918700	-0.176831520790162	0.647143731047791	-4.34606767214001	6.44439284431275e-05	0.0177361990857528	0.753295994884243	0.770592151222055	0.593760630431893	-0.176831520790162	14	24600067	R	II	FITM1	TSS1500	shore	TSS1500-shore	chr14:24601498-24601700	NA	NA				High-ICI hypermethylated probes
cg02329140	0.114943335606005	0.707531610956202	4.34524141462592	6.46219848496578e-05	0.0177613308506986	0.750622674929333	0.627288150250122	0.742231485856128	0.114943335606005	1	232668750	R	II		IGR	opensea	IGR-opensea		NA	TRUE				Low-ICI hypermethylated probes
cg01627785	-0.123653273267339	0.744624846012366	-4.34441440841835	6.48006821320724e-05	0.0177889703092543	0.747947169556812	0.830948829236735	0.707295555969396	-0.123653273267339	3	196753395	R	II	MFI2	Body	shore	Body-shore	chr3:196754626-196754831	NA	NA				High-ICI hypermethylated probes
cg03674660	-0.265315464425718	0.655691171471395	-4.3439006055865	6.49119454381537e-05	0.0178051770713364	0.746285049668814	0.8409114013535	0.575595936927782	-0.265315464425718	6	168844698	R	II	SMOC2	Body	shore	Body-shore	chr6:168841818-168843100	NA	NA				High-ICI hypermethylated probes
cg04658856	-0.225070614433565	0.687904972198196	-4.34276696585532	6.51580917957255e-05	0.0178281625825807	0.742618120258929	0.845029740765024	0.61995912633146	-0.225070614433565	6	16242468	R	II	GMPR	Body	shelf	Body-shelf	chr6:16238589-16239231	NA	NA				High-ICI hypermethylated probes
cg15027294	-0.203956787884405	0.420551009981553	-4.34261473265242	6.51912151990687e-05	0.0178281625825807	0.742125732868508	0.562935937372552	0.358979149488148	-0.203956787884405	12	1609537	R	II	LOC100292680	TSS200	opensea	TSS200-opensea		TRUE	NA				High-ICI hypermethylated probes
cg04039225	0.256100605409714	0.421247005470072	4.34239102875971	6.52399191735503e-05	0.0178281625825807	0.741402193245439	0.242459790372724	0.498560395782438	0.256100605409714	3	169629516	F	II	SAMD7	5'UTR	opensea	5'UTR-opensea		NA	NA			rs75124289	Low-ICI hypermethylated probes
cg18695839	-0.141320049922244	0.265186713864905	-4.3419317414941	6.53400245147608e-05	0.0178281625825807	0.739916745890608	0.363844107206849	0.222524057284605	-0.141320049922244	12	54446944	F	II	HOXC4	5'UTR	shore	5'UTR-shore	chr12:54447744-54448091	TRUE	TRUE				High-ICI hypermethylated probes
cg11726150	-0.199022711316423	0.419112370150541	-4.34171171279988	6.53880344898936e-05	0.0178281625825807	0.739205145222258	0.558052753522384	0.359030042205961	-0.199022711316423	6	31845172	R	II	SLC44A4	Body	opensea	Body-opensea		NA	NA	low-CpG:31953020-31953434			High-ICI hypermethylated probes
cg16955704	-0.223292075093908	0.374629538801367	-4.3416509678053	6.54012950163194e-05	0.0178281625825807	0.739008691176156	0.530512685565039	0.307220610471131	-0.223292075093908	4	656994	R	II	PDE6B	Body	island	Body-island	chr4:656993-658162	NA	NA				High-ICI hypermethylated probes
cg09556515	-0.302098147209842	0.445145992958767	-4.34162184420612	6.54076535755906e-05	0.0178281625825807	0.738914503641337	0.656044699501486	0.353946552291645	-0.302098147209842	16	85470485	R	I		IGR	opensea	IGR-opensea		TRUE	TRUE				High-ICI hypermethylated probes
cg19225031	-0.189800431470201	0.746121090782104	-4.34151389535615	6.54312273117428e-05	0.0178281625825807	0.738565392901907	0.878623278789603	0.688822847319402	-0.189800431470201	1	36602646	R	II	TRAPPC3	3'UTR	opensea	3'UTR-opensea		NA	NA				High-ICI hypermethylated probes
cg27096416	0.303740786514194	0.420211188717194	4.34131182811013	6.54753767386217e-05	0.0178281625825807	0.737911910520956	0.20816573398087	0.511906520495063	0.303740786514194	7	140599947	F	II	BRAF	Body	opensea	Body-opensea		NA	TRUE				Low-ICI hypermethylated probes
cg24417499	-0.255749014941028	0.376300933816724	-4.34116873851969	6.55066577451552e-05	0.0178281625825807	0.737449169551676	0.554842698964235	0.299093684023206	-0.255749014941028	1	33351653	R	II	HPCA	TSS1500	shore	TSS1500-shore	chr1:33351686-33352397	NA	NA				High-ICI hypermethylated probes
cg22009908	0.254626434586433	0.327627541390459	4.34111619939141	6.55181470450812e-05	0.0178281625825807	0.737279263748833	0.149869464415024	0.404495899001457	0.254626434586433	5	106724064	R	II	EFNA5	Body	opensea	Body-opensea		NA	TRUE			rs76945754	Low-ICI hypermethylated probes
cg07938763	-0.204515382918417	0.365110089091241	-4.33970517004511	6.58274468991244e-05	0.0178708868731246	0.732716507675604	0.507884979053155	0.303369596134738	-0.204515382918417	19	2516966	F	I	GNG7	Body	shelf	Body-shelf	chr19:2513215-2513696	NA	NA		rs80039362		High-ICI hypermethylated probes
cg15839913	-0.17745130252225	0.713255789420292	-4.33938090229872	6.58987274881146e-05	0.0178708868731246	0.731668041412385	0.837136887407523	0.659685584885273	-0.17745130252225	11	2226480	R	II		IGR	opensea	IGR-opensea		NA	NA				High-ICI hypermethylated probes
cg04365102	-0.167630389482737	0.63959147918026	-4.338954939607	6.59924768531953e-05	0.0178708868731246	0.730290816869013	0.756616468064436	0.588986078581698	-0.167630389482737	2	238769342	F	II	RAMP1	Body	shore	Body-shore	chr2:238768073-238768831	NA	NA				High-ICI hypermethylated probes
cg17897626	-0.145467427848731	0.19863614946795	-4.33861225775012	6.60679913045893e-05	0.0178709116294605	0.729182902099521	0.300188882117063	0.154721454268333	-0.145467427848731	19	57155294	R	II		IGR	shore	IGR-shore	chr19:57154197-57155015	NA	NA				High-ICI hypermethylated probes
cg19610383	-0.256263565829431	0.664643829759622	-4.3380667086225	6.61883837916956e-05	0.0178798575598139	0.727419187307627	0.843544809678282	0.58728124384885	-0.256263565829431	8	26485445	R	II	DPYSL2	Body	opensea	Body-opensea		NA	TRUE				High-ICI hypermethylated probes
cg07570257	-0.243315670584035	0.62935728809901	-4.33766893565059	6.62762994270168e-05	0.0178800183130095	0.726133285756602	0.799219171336921	0.555903500752886	-0.243315670584035	6	33132181	R	I	COL11A2	Body	shelf	Body-shelf	chr6:33129291-33129718	NA	NA				High-ICI hypermethylated probes
cg12378436	-0.133705529758024	0.602542365790616	-4.33613962227649	6.66153674739239e-05	0.0179288089921609	0.72118990701104	0.695883962036784	0.562178432278759	-0.133705529758025	10	134547456	F	II	INPP5A	Body	shelf	Body-shelf	chr10:134549623-134549876	NA	NA				High-ICI hypermethylated probes
cg26493346	-0.159888025177923	0.361838792173148	-4.33570894695623	6.67111579105952e-05	0.0179382492806923	0.719797931669823	0.473458734278491	0.313570709100568	-0.159888025177923	16	1812273	R	II	MAPK8IP3	Body	shore	Body-shore	chr16:1814084-1814482	NA	NA				High-ICI hypermethylated probes
cg06536578	-0.229415123386975	0.637214961804402	-4.3352420254723	6.68151616533447e-05	0.0179535769515126	0.718288878961629	0.797372689451913	0.567957566064937	-0.229415123386976	14	24048555	R	II	JPH4	TSS1500	shore	TSS1500-shore	chr14:24044886-24046760	NA	NA				High-ICI hypermethylated probes
cg25640096	-0.247747438671931	0.513463083258886	-4.33480992975305	6.69115487675049e-05	0.0179535769515126	0.716892447990927	0.686418842331744	0.438671403659813	-0.247747438671931	6	1374513	R	II		IGR	shelf	IGR-shelf	chr6:1378445-1379318	NA	NA				High-ICI hypermethylated probes
cg15089090	-0.126743442413043	0.168338849985539	-4.33475982775402	6.69227337169385e-05	0.0179535769515126	0.716730534411643	0.256820121104079	0.130076678691036	-0.126743442413043	3	52089313	F	II	DUSP7	Body	shore	Body-shore	chr3:52089652-52090845	NA	NA				High-ICI hypermethylated probes
cg21663219	-0.126247052958771	0.346493658184166	-4.33466673870132	6.69435200816548e-05	0.0179535769515126	0.716429702795161	0.434628393268591	0.30838134030982	-0.126247052958771	22	42323397	R	II	TNFRSF13C	TSS1500	shore	TSS1500-shore	chr22:42322043-42322909	NA	NA				High-ICI hypermethylated probes
cg27589814	-0.150381534626911	0.39574263474072	-4.33367882714059	6.7164503831446e-05	0.0179775232654096	0.713237300478741	0.500725970234978	0.350344435608068	-0.150381534626911	16	1149424	R	II		IGR	shelf	IGR-shelf	chr16:1152412-1152700	NA	NA				High-ICI hypermethylated probes
cg03501953	-0.129802498842087	0.685767798940997	-4.33300964763412	6.73145942789997e-05	0.01798723385148	0.711075063160428	0.776384637755284	0.646582138913197	-0.129802498842087	16	1265196	R	I	CACNA1H	Body	island	Body-island	chr16:1265151-1265661	NA	NA			rs72552045	High-ICI hypermethylated probes
cg25048564	-0.210473701775288	0.307351907066855	-4.33292969327611	6.73325490794694e-05	0.01798723385148	0.710816726935277	0.454286378117527	0.24381267634224	-0.210473701775288	21	33244752	F	II	HUNK	TSS1500	shore	TSS1500-shore	chr21:33244910-33246609	NA	NA				High-ICI hypermethylated probes
cg16561155	-0.184007971637426	0.347240315049659	-4.33160297144651	6.76311631192301e-05	0.0180317185596132	0.706530352934585	0.475698710343711	0.291690738706285	-0.184007971637426	7	75189413	R	II	HIP1	Body	shore	Body-shore	chr7:75189055-75189289	NA	NA				High-ICI hypermethylated probes
cg13156014	-0.155484482050982	0.655087625519166	-4.33112451393045	6.77391686081508e-05	0.0180476376690939	0.704984702694399	0.763633396007588	0.608148913956606	-0.155484482050982	2	219917079	R	II		IGR	shelf	IGR-shelf	chr2:219920171-219920581	NA	NA				High-ICI hypermethylated probes
cg21133433	-0.314007750377266	0.568987164850167	-4.33075330704643	6.78230792983487e-05	0.0180476376690939	0.703785579158155	0.788200122660712	0.474192372283446	-0.314007750377266	4	169991796	R	II		IGR	opensea	IGR-opensea		TRUE	TRUE				High-ICI hypermethylated probes
cg22603275	-0.105070630337596	0.190301877954374	-4.32902973068475	6.82140179455669e-05	0.0180998907529802	0.698218476211991	0.263653072718356	0.15858244238076	-0.105070630337596	15	92938502	R	II	ST8SIA2	Body	island	Body-island	chr15:92936677-92938521	NA	NA				High-ICI hypermethylated probes
cg17276021	-0.2129379554511	0.509560460346294	-4.32891362114868	6.82404324086907e-05	0.0180998907529802	0.697843483006619	0.658215259434798	0.445277303983697	-0.2129379554511	1	16084445	F	I	FBLIM1	TSS1500	shore	TSS1500-shore	chr1:16085147-16085862	TRUE	NA				High-ICI hypermethylated probes
cg07369399	-0.20371832670912	0.52925091052646	-4.32806880472229	6.8432924751488e-05	0.0181351720810664	0.695115163209302	0.671469365021506	0.467751038312386	-0.20371832670912	16	50772296	F	II		IGR	shelf	IGR-shelf	chr16:50775625-50776629	NA	NA		rs77048981		High-ICI hypermethylated probes
cg12008034	-0.143923583235077	0.401198961838306	-4.32778515380382	6.84976733353821e-05	0.0181351720810664	0.69419917350949	0.501673916172228	0.357750332937151	-0.143923583235077	6	33996580	F	II	GRM4	Body	shore	Body-shore	chr6:33995938-33996164	NA	NA				High-ICI hypermethylated probes
cg27222162	-0.214233525306628	0.768517301591035	-4.32714319784192	6.86444319149033e-05	0.0181464823391663	0.692126218555191	0.918076555106983	0.703843029800355	-0.214233525306628	1	2250860	R	I		IGR	shore	IGR-shore	chr1:2249315-2249634	NA	NA				High-ICI hypermethylated probes
cg19207090	0.148597093889185	0.642048244179818	4.32652642901602	6.87857206163193e-05	0.0181464823391663	0.690134731756792	0.538310650332652	0.686907744221836	0.148597093889185	3	47053445	F	II	LOC100129354	Body	shore	Body-shore	chr3:47050486-47051609	NA	NA				Low-ICI hypermethylated probes
cg03594868	-0.262707932700104	0.537050028980924	-4.32632066574283	6.88329195569721e-05	0.0181464823391663	0.689470371687897	0.72044990652628	0.457741973826176	-0.262707932700104	19	18234829	F	II	MAST3	Body	island	Body-island	chr19:18234710-18234912	NA	NA				High-ICI hypermethylated probes
cg21650193	-0.225169629931357	0.649817893528346	-4.325819929517	6.89479124806336e-05	0.0181464823391663	0.687853676879798	0.807011786121935	0.581842156190578	-0.225169629931357	13	112998074	R	II		IGR	island	IGR-island	chr13:112998073-112998274	NA	NA				High-ICI hypermethylated probes
cg12644059	-0.168579473322125	0.294852566034635	-4.3255226049796	6.90162808112364e-05	0.0181464823391663	0.686893765821023	0.412540122882156	0.243960649560031	-0.168579473322125	15	91361926	F	II		IGR	shore	IGR-shore	chr15:91362445-91362658	TRUE	NA		rs447804		High-ICI hypermethylated probes
cg01290856	0.122799660717457	0.68853480318041	4.32542328371709	6.90391339484132e-05	0.0181464823391663	0.686573114425333	0.602806738151242	0.725606398868699	0.122799660717457	2	134324896	R	II	NCKAP5	5'UTR	opensea	5'UTR-opensea		NA	NA				Low-ICI hypermethylated probes
cg09524686	-0.194546511348685	0.488329617858828	-4.32514921225167	6.91022341040746e-05	0.0181464823391663	0.685688312759665	0.62414510691357	0.429598595564885	-0.194546511348685	11	829182	F	II	EFCAB4A	Body	shore	Body-shore	chr11:829284-833558	NA	TRUE				High-ICI hypermethylated probes
cg00093542	-0.111703050292343	0.170869942472707	-4.32498686772731	6.91396375513311e-05	0.0181464823391663	0.685164218412193	0.248851317205097	0.137148266912754	-0.111703050292343	8	27144453	F	II	TRIM35	3'UTR	shore	3'UTR-shore	chr8:27145131-27145601	NA	NA				High-ICI hypermethylated probes
cg00675160	-0.252154383148256	0.417140987944305	-4.32451282687677	6.92489672143754e-05	0.0181464823391663	0.683633932403125	0.593173293161012	0.341018910012756	-0.252154383148256	16	1208531	F	I	CACNA1H	Body	island	Body-island	chr16:1208357-1208721	NA	NA				High-ICI hypermethylated probes
cg07319459	-0.16549570642784	0.437246147435284	-4.32398166464575	6.93716708387785e-05	0.0181464823391663	0.681919342193702	0.552780885884908	0.387285179457068	-0.16549570642784	1	17448608	R	II		IGR	shelf	IGR-shelf	chr1:17445651-17446088	NA	TRUE				High-ICI hypermethylated probes
cg00602326	0.210358830804544	0.346238582518572	4.32394800151862	6.93794544725431e-05	0.0181464823391663	0.681810681043376	0.19938430440974	0.409743135214284	0.210358830804544	5	31427700	R	II	RNASEN	Body	opensea	Body-opensea		NA	TRUE				Low-ICI hypermethylated probes
cg02803345	0.201479752176184	0.603478169344969	4.32370682616961	6.94352442225247e-05	0.0181464823391663	0.681032203160878	0.462822493297444	0.664302245473629	0.201479752176184	16	27896111	R	II	GSG1L	Body	opensea	Body-opensea		NA	NA				Low-ICI hypermethylated probes
cg09122655	-0.121027649690362	0.602750539439606	-4.32301132811013	6.95963744883897e-05	0.0181542107303332	0.678787353809621	0.68724154016684	0.566213890476478	-0.121027649690362	10	72027576	R	II	NPFFR1	TSS1500	opensea	TSS1500-opensea		TRUE	NA				High-ICI hypermethylated probes
cg09959355	-0.212019371256666	0.321199053219769	-4.32300515886617	6.95978053813998e-05	0.0181542107303332	0.678767442185895	0.469212576549894	0.257193205293228	-0.212019371256666	17	81045495	R	II	METRNL	Body	island	Body-island	chr17:81045494-81045941	NA	NA				High-ICI hypermethylated probes
cg19234613	-0.111823874658048	0.295617890748606	-4.32275801610054	6.9655151166868e-05	0.0181576037153169	0.677969784305614	0.373683614566488	0.26185973990844	-0.111823874658048	12	107832502	R	II	BTBD11	Body	opensea	Body-opensea		NA	TRUE				High-ICI hypermethylated probes
cg00025643	-0.186561523467759	0.580473934177295	-4.3223456666804	6.97509330550402e-05	0.0181710054772891	0.676638966542463	0.710714997730259	0.524153474262499	-0.186561523467759	1	37904694	R	II		IGR	opensea	IGR-opensea		NA	TRUE				High-ICI hypermethylated probes
cg00130808	-0.390095284004392	0.58424206678088	-4.32154632013035	6.99369730723864e-05	0.0181973393727054	0.674059322909005	0.85657273674621	0.466477452741819	-0.390095284004392	15	37178909	R	I	LOC145845	TSS200	shore	TSS200-shore	chr15:37179516-37179782	NA	NA			rs73389562	High-ICI hypermethylated probes
cg27435133	-0.224279133446987	0.663698810107342	-4.32152952057137	6.99408881795985e-05	0.0181973393727054	0.674005109935661	0.820271035343918	0.595991901896931	-0.224279133446987	16	89034778	F	I	CBFA2T3	Body	shore	Body-shore	chr16:89033529-89033786	NA	NA				High-ICI hypermethylated probes
cg00953314	-0.210051749792309	0.698386119517616	-4.32081987414737	7.01064649250396e-05	0.0182172716718856	0.671715137716098	0.84502602031602	0.634974270523711	-0.210051749792309	1	208257819	R	II	PLXNA2	Body	opensea	Body-opensea		NA	TRUE				High-ICI hypermethylated probes
cg00284259	-0.146548079936623	0.378210970469403	-4.32008892915774	7.02774098478823e-05	0.0182364167925778	0.669356621500451	0.480518120613839	0.333970040677215	-0.146548079936623	7	75827723	F	II		IGR	shelf	IGR-shelf	chr7:75831068-75831542	NA	NA				High-ICI hypermethylated probes
cg02338271	0.250863420772728	0.477992587894038	4.31978991008144	7.03474577895381e-05	0.0182364167925778	0.668391840515377	0.302861520562134	0.553724941334862	0.250863420772728	1	171868115	F	I	DNM3	Body	opensea	Body-opensea		NA	TRUE		rs71523161		Low-ICI hypermethylated probes
cg15806588	-0.200422470300832	0.621733992539538	-4.31954879042033	7.04039917381753e-05	0.0182364167925778	0.667613894071155	0.761651566145779	0.561229095844947	-0.200422470300833	13	29177556	F	II		IGR	opensea	IGR-opensea		NA	TRUE				High-ICI hypermethylated probes
cg14378924	-0.144908589544533	0.590269254132901	-4.31942470781707	7.04331019022714e-05	0.0182364167925778	0.667213562961341	0.691431854380971	0.546523264836438	-0.144908589544533	6	31832529	R	II	SLC44A4	Body	shore	Body-shore	chr6:31830299-31830948	NA	TRUE	low-CpG:31940476-31941114			High-ICI hypermethylated probes
cg02524946	0.333391993087314	0.682906237811432	4.31859507985821	7.06280363368581e-05	0.0182479230986253	0.664537050451053	0.450160884146703	0.783552877234018	0.333391993087314	7	35294640	R	II	TBX20	TSS1500	island	TSS1500-island	chr7:35292985-35294674	TRUE	TRUE				Low-ICI hypermethylated probes
cg08821738	-0.242559552281845	0.6072226944218	-4.31853812166487	7.06414388205015e-05	0.0182479230986253	0.664353303077625	0.776556721486484	0.533997169204639	-0.242559552281845	17	77043179	F	II	C1QTNF1	Body	shore	Body-shore	chr17:77043741-77044489	NA	NA				High-ICI hypermethylated probes
cg10811485	0.114967894900526	0.792731401998403	4.31813348506897	7.07367226381973e-05	0.0182479230986253	0.663047976516318	0.712470796124451	0.827438691024977	0.114967894900526	13	99630583	R	II	DOCK9	Body	opensea	Body-opensea		TRUE	TRUE				Low-ICI hypermethylated probes
cg26530485	-0.337080481190958	0.605721134513653	-4.31797179110672	7.07748332880861e-05	0.0182479230986253	0.662526380310109	0.841041470439417	0.503960989248458	-0.337080481190958	1	23496304	F	II	LUZP1	TSS1500	opensea	TSS1500-opensea		NA	NA		rs78096408		High-ICI hypermethylated probes
cg22496729	-0.138264939923032	0.679463649406516	-4.31757912989026	7.08674652212796e-05	0.0182479230986253	0.661259762727052	0.775988230107501	0.637723290184468	-0.138264939923032	17	47926025	F	II	TAC4	TSS1500	shelf	TSS1500-shelf	chr17:47928266-47929357	NA	NA				High-ICI hypermethylated probes
cg20038116	-0.268808588311636	0.5876368354632	-4.31752258757184	7.08808137203946e-05	0.0182479230986253	0.661077377151609	0.775295661265662	0.506487072954027	-0.268808588311636	10	131697711	F	II	EBF3	Body	shore	Body-shore	chr10:131697079-131697412	NA	NA		rs74777357	rs77591282	High-ICI hypermethylated probes
cg05241698	-0.283239055517361	0.588715349081797	-4.31747181559027	7.08928020441017e-05	0.0182479230986253	0.660913605605226	0.786448274631652	0.503209219114292	-0.283239055517361	4	7164742	F	II		IGR	opensea	IGR-opensea		NA	NA		rs6816089		High-ICI hypermethylated probes
cg20575856	-0.187592672519557	0.702127700603349	-4.31696422923785	7.10127622685151e-05	0.0182673193974723	0.659276370463773	0.833088622928323	0.645495950408766	-0.187592672519557	10	50428882	R	II		IGR	opensea	IGR-opensea		NA	TRUE				High-ICI hypermethylated probes
cg11543229	-0.145047371817374	0.790026485296319	-4.31594999166784	7.12530535836455e-05	0.0182929016107846	0.656005187878601	0.891285971282033	0.746238599464659	-0.145047371817374	17	74382996	R	I	SPHK1	Body	shore	Body-shore	chr17:74378848-74382513	NA	NA				High-ICI hypermethylated probes
cg18346707	0.205015202803248	0.53317771823386	4.31583249991571	7.12809405911389e-05	0.0182929016107846	0.655626269501416	0.390053897408951	0.595069100212199	0.205015202803248	2	231732249	R	II	ITM2C	Body	shore	Body-shore	chr2:231729631-231730821	NA	TRUE				Low-ICI hypermethylated probes
cg03594550	-0.156972054892627	0.176745880949891	-4.31572477338054	7.13065191276703e-05	0.0182929016107846	0.655278848838383	0.286330145686254	0.129358090793626	-0.156972054892627	2	5837929	R	II	SOX11	3'UTR	shore	3'UTR-shore	chr2:5836068-5837643	NA	NA				High-ICI hypermethylated probes
cg01061714	-0.220785960408085	0.422529363017667	-4.31557828338005	7.13413159714358e-05	0.0182929016107846	0.65480642162031	0.576662958019537	0.355876997611452	-0.220785960408085	5	64330880	F	II		IGR	shore	IGR-shore	chr5:64331232-64331795	NA	TRUE				High-ICI hypermethylated probes
cg02461114	0.213557093914417	0.413739881918698	4.315414576773	7.13802219493603e-05	0.0182929016107846	0.654278480137008	0.264652854091652	0.478209948006069	0.213557093914417	20	61560373	R	II	DIDO1	5'UTR	shore	5'UTR-shore	chr20:61560433-61560954	NA	NA				Low-ICI hypermethylated probes
cg25608626	-0.141560062791452	0.430054988848239	-4.31502592445664	7.14726704864283e-05	0.018300904625856	0.653025143450221	0.528879938344158	0.387319875552706	-0.141560062791452	11	117362843	F	II	DSCAML1	Body	opensea	Body-opensea		NA	TRUE				High-ICI hypermethylated probes
cg07890065	0.185635337837239	0.610060204253576	4.3149076548781	7.15008263245057e-05	0.018300904625856	0.652643755008786	0.480465723121919	0.666101060959157	0.185635337837239	16	27896268	R	II	GSG1L	Body	opensea	Body-opensea		NA	NA				Low-ICI hypermethylated probes
cg06943431	-0.152576494862426	0.532809000915159	-4.31419735963033	7.16701498631895e-05	0.0183327856295269	0.650353342298028	0.639324667139872	0.486748172277446	-0.152576494862426	4	3475041	R	II	DOK7	Body	shore	Body-shore	chr4:3475058-3475360	NA	NA				High-ICI hypermethylated probes
cg13982037	-0.25272179622089	0.310670830320599	-4.31388530950533	7.17446611281346e-05	0.0183395630195751	0.649347163977178	0.487099254097447	0.234377457876557	-0.25272179622089	6	119862526	F	II		IGR	opensea	IGR-opensea		NA	TRUE				High-ICI hypermethylated probes
cg10976908	0.112052971371593	0.730934205563029	4.31267631416774	7.20340570700817e-05	0.0183701381382583	0.645449188175772	0.652708546303616	0.764761517675208	0.112052971371592	15	72610141	F	II	BRUNOL6	Body	shore	Body-shore	chr15:72611946-72612802	NA	NA				Low-ICI hypermethylated probes
cg01345136	-0.202507003849225	0.261186018113795	-4.31264961406628	7.20404610453129e-05	0.0183701381382583	0.645363108999697	0.402558832121745	0.20005182827252	-0.202507003849225	12	132904123	F	II	GALNT9	Body	shore	Body-shore	chr12:132905449-132906206	NA	NA				High-ICI hypermethylated probes
cg15062725	-0.274650088994308	0.631943501791023	-4.31238227356469	7.21046127679673e-05	0.0183714736879357	0.644501236609336	0.823680356371956	0.549030267377647	-0.274650088994308	19	3831364	R	II	ZFR2	Body	island	Body-island	chr19:3831363-3831807	NA	NA				High-ICI hypermethylated probes
cg01624004	-0.176167224136122	0.480068294926589	-4.31146897194525	7.23241905165308e-05	0.0183852491902376	0.641557056285213	0.603052960832938	0.426885736696816	-0.176167224136122	7	150745494	R	I	ACCN3	TSS200	shore	TSS200-shore	chr7:150746002-150746381	NA	NA				High-ICI hypermethylated probes
cg23521253	0.180283340208036	0.724963604760538	4.31111418102608	7.24096653590014e-05	0.0183863980304997	0.640413407808148	0.599105423860588	0.779388764068624	0.180283340208036	10	126653589	F	II	ZRANB1	Body	opensea	Body-opensea		NA	TRUE				Low-ICI hypermethylated probes
cg25250013	-0.157217054466187	0.575063447579919	-4.31094033252839	7.24515841269087e-05	0.0183863980304997	0.639853033206252	0.684818749754427	0.52760169528824	-0.157217054466187	19	11302225	F	II	KANK2	Body	shore	Body-shore	chr19:11303697-11304609	NA	NA		rs36047808		High-ICI hypermethylated probes
cg05546878	-0.184670275723308	0.345276449391636	-4.31066976816562	7.25168702226852e-05	0.0183885720091736	0.63898093069992	0.474197207915455	0.289526932192147	-0.184670275723308	2	219696695	F	II	PRKAG3	TSS200	opensea	TSS200-opensea		NA	NA				High-ICI hypermethylated probes
cg05478790	-0.170208185134609	0.632392188305273	-4.31000867032823	7.26766313317115e-05	0.018417679531405	0.636850141261687	0.751216770380377	0.581008585245769	-0.170208185134609	17	76100955	R	II	TNRC6C	3'UTR	island	3'UTR-island	chr17:76100679-76101115	NA	NA				High-ICI hypermethylated probes
cg13964439	0.11379291256464	0.567223067778385	4.30876666694664	7.29777006477963e-05	0.0184711160911554	0.63284744784582	0.487782732591749	0.60157564515639	0.113792912564641	9	90278260	R	II	DAPK1	Body	shelf	Body-shelf	chr9:90274453-90274813	NA	NA				Low-ICI hypermethylated probes
cg22303227	-0.170758498812704	0.559933685194647	-4.30687656957516	7.34382013861564e-05	0.0185189980670364	0.626757140690352	0.679142448516724	0.50838394970402	-0.170758498812704	17	41018992	F	II	LOC90586	TSS200	opensea	TSS200-opensea		NA	NA				High-ICI hypermethylated probes
cg19539568	-0.232789167124817	0.614066318451307	-4.30635259648417	7.35663610962009e-05	0.0185357692607935	0.625069008258614	0.776579510595047	0.54379034347023	-0.232789167124817	14	21446087	F	II		IGR	opensea	IGR-opensea		NA	TRUE				High-ICI hypermethylated probes
cg12609829	-0.238657445264153	0.638296282057651	-4.30589551388058	7.36783375697767e-05	0.0185357692607935	0.623596462342586	0.804906196676022	0.566248751411869	-0.238657445264153	15	38988755	R	II	C15orf53	TSS200	opensea	TSS200-opensea		NA	NA				High-ICI hypermethylated probes
cg00127408	-0.160878911083899	0.381647353773687	-4.30570967148969	7.37239127852896e-05	0.0185357692607935	0.622997770123257	0.493959046417164	0.333080135333265	-0.160878911083899	9	139420471	R	II	NOTCH1	Body	shore	Body-shore	chr9:139421103-139421509	NA	NA				High-ICI hypermethylated probes
cg18133966	-0.110818030123343	0.632521409664514	-4.30533704011471	7.38153779876918e-05	0.0185357692607935	0.621797373027905	0.709884940127979	0.599066910004637	-0.110818030123343	12	120765718	F	II	PLA2G1B	TSS200	opensea	TSS200-opensea		NA	NA			rs41279094	High-ICI hypermethylated probes
cg14271862	-0.228605361135116	0.607808817897168	-4.30528374413696	7.3828468909784e-05	0.0185357692607935	0.621625689038591	0.767401239821683	0.538795878686567	-0.228605361135116	11	2222076	F	II		IGR	opensea	IGR-opensea		NA	NA		rs36100276		High-ICI hypermethylated probes
cg25957306	0.121335819495384	0.738061036425071	4.30526227814487	7.38337421713263e-05	0.0185357692607935	0.621556540255043	0.653354898286784	0.774690717782168	0.121335819495384	12	57020274	R	II	BAZ2A	Body	shelf	Body-shelf	chr12:57023296-57024233	NA	NA				Low-ICI hypermethylated probes
cg26546912	-0.181807231933017	0.336259012955767	-4.30503251931099	7.3890206885699e-05	0.0185357692607935	0.620816424230411	0.463181042795798	0.281373810862781	-0.181807231933017	11	134216065	R	II	GLB1L2	Body	shelf	Body-shelf	chr11:134211759-134212611	NA	NA				High-ICI hypermethylated probes
cg15102387	-0.170690516565203	0.477171559533995	-4.30438580537913	7.4049366605734e-05	0.0185361496996209	0.618733282098689	0.596332863551212	0.42564234698601	-0.170690516565203	11	2240973	R	II		IGR	opensea	IGR-opensea		NA	NA				High-ICI hypermethylated probes
cg21528927	-0.163137543604559	0.373135566036874	-4.30398755658658	7.41475435944906e-05	0.0185452287811755	0.617450549224182	0.487024039874019	0.32388649626946	-0.163137543604559	12	308821	F	II	SLC6A12	Body	shelf	Body-shelf	chr12:312591-313331	TRUE	NA		rs75840477		High-ICI hypermethylated probes
cg02599587	-0.191147128177674	0.347126982864054	-4.30368793556278	7.42214901431083e-05	0.0185452287811755	0.616485526837294	0.4805693176296	0.289422189451926	-0.191147128177675	5	153275285	R	II		IGR	opensea	IGR-opensea		NA	TRUE				High-ICI hypermethylated probes
cg09540111	-0.140770182755378	0.141275529279436	-4.30350295722762	7.42671786537586e-05	0.0185453296374141	0.615889762633365	0.239549053089794	0.0987788703344164	-0.140770182755378	3	186649601	F	II	ST6GAL1	5'UTR	shore	5'UTR-shore	chr3:186648174-186649103	NA	NA		rs10716373		High-ICI hypermethylated probes
cg16674047	-0.113377928312872	0.817947177561445	-4.30323857932489	7.43325258624688e-05	0.0185485545872799	0.615038295349112	0.897097806760997	0.783719878448125	-0.113377928312872	15	68867577	F	II		IGR	shelf	IGR-shelf	chr15:68870633-68871974	NA	NA		rs76160781		High-ICI hypermethylated probes
cg15977933	-0.158066951212487	0.755251241116287	-4.30243706774333	7.45309802604591e-05	0.0185485545872799	0.612457062606345	0.865599867434438	0.707532916221951	-0.158066951212487	1	183388732	F	II	NMNAT2	TSS1500	shore	TSS1500-shore	chr1:183386000-183387664	NA	NA			rs74129797	High-ICI hypermethylated probes
cg17367077	-0.19272552020778	0.658005270339525	-4.3020393404045	7.46296488357569e-05	0.0185485545872799	0.611176283702425	0.792549501427975	0.599823981220195	-0.19272552020778	5	159850153	R	II	PTTG1	Body	shore	Body-shore	chr5:159848779-159849113	NA	NA				High-ICI hypermethylated probes
cg05870029	-0.106133964801931	0.195225317509832	-4.3018054655408	7.46877280427238e-05	0.0185485545872799	0.61042317584413	0.269318840107407	0.163184875305476	-0.106133964801931	16	87166431	R	I		IGR	opensea	IGR-opensea		TRUE	NA				High-ICI hypermethylated probes
cg13800802	-0.259212244085913	0.486990597922529	-4.3011600048305	7.48482464217037e-05	0.0185520993333777	0.608344807924845	0.667950089076846	0.408737844990933	-0.259212244085913	9	98619666	R	II	C9orf130	Body	opensea	Body-opensea		NA	TRUE				High-ICI hypermethylated probes
cg08924321	0.133163038118494	0.685216053738691	4.30063238043555	7.4979709522914e-05	0.0185520993333777	0.606645979790525	0.592253178071063	0.725416216189557	0.133163038118493	11	35663067	R	II		IGR	opensea	IGR-opensea		NA	TRUE				Low-ICI hypermethylated probes
cg25741368	-0.158389394408863	0.309533886222654	-4.30048847393552	7.50156042856889e-05	0.0185520993333777	0.606182651379259	0.420107614394879	0.261718219986016	-0.158389394408863	19	42906601	R	II	LIPE	Body	shore	Body-shore	chr19:42905723-42906350	NA	NA				High-ICI hypermethylated probes
cg09769755	-0.130657456226243	0.318551252652135	-4.30022847118624	7.50804994510986e-05	0.0185560752071277	0.605345552419872	0.409764948508192	0.279107492281949	-0.130657456226243	17	43074945	R	II		IGR	opensea	IGR-opensea		NA	TRUE				High-ICI hypermethylated probes
cg16467775	-0.119345558971592	0.18027463241512	-4.29950151199238	7.52622341127628e-05	0.0185785664178802	0.603005178299955	0.263591343395288	0.144245784423696	-0.119345558971592	16	90085110	R	II	DBNDD1	Body	island	Body-island	chr16:90085109-90086419	TRUE	NA				High-ICI hypermethylated probes
cg22387253	0.20195164412668	0.416508425546193	4.29898441001465	7.53917662894126e-05	0.0185881327401794	0.601340533092	0.275523315495492	0.477474959622172	0.20195164412668	15	61310104	R	II	RORA	Body	opensea	Body-opensea		NA	TRUE				Low-ICI hypermethylated probes
cg12308965	-0.120184928607512	0.31675763894398	-4.29861332964284	7.54848541847127e-05	0.0185998859174781	0.60014601643531	0.400660324952997	0.280475396345486	-0.120184928607512	11	67291387	F	II	CABP2	TSS1500	shelf	TSS1500-shelf	chr11:67287234-67287568	NA	NA				High-ICI hypermethylated probes
cg08247612	-0.260935841904998	0.689516531510297	-4.29841365271995	7.55349906743233e-05	0.0186010478598274	0.59950327183338	0.871679289066616	0.610743447161619	-0.260935841904998	1	160336486	F	II	NHLH1	TSS1500	opensea	TSS1500-opensea		NA	NA				High-ICI hypermethylated probes
cg00506886	-0.239106723347048	0.646538946615961	-4.29712315530523	7.58598010984845e-05	0.0186585951379327	0.595349601620216	0.813462508197863	0.574355784850815	-0.239106723347048	19	38974350	F	II	RYR1	Body	shore	Body-shore	chr19:38976252-38976795	NA	NA				High-ICI hypermethylated probes
cg19549898	0.229501258588014	0.675581984305073	4.29662428538761	7.59857273705317e-05	0.0186783499322595	0.593744068324278	0.515364124536082	0.744865383124097	0.229501258588014	14	68000922	R	II	PLEKHH1	5'UTR	shore	5'UTR-shore	chr14:67999568-68000440	NA	NA				Low-ICI hypermethylated probes
cg20316538	-0.169189783138453	0.633209638108264	-4.29550763153963	7.62683338214656e-05	0.018725339134634	0.590150616418662	0.751323260299259	0.582133477160806	-0.169189783138453	2	218937982	F	II	RUFY4	Body	opensea	Body-opensea		NA	NA				High-ICI hypermethylated probes
cg26446913	-0.171315176949416	0.531389215617428	-4.29478734722128	7.64511678204955e-05	0.0187445189228012	0.587832938038853	0.650986603299096	0.47967142634968	-0.171315176949416	19	45940055	F	II		IGR	shelf	IGR-shelf	chr19:45942865-45943396	NA	NA		rs11879633		High-ICI hypermethylated probes
cg11707445	-0.227321324418001	0.546850083213166	-4.29465909743642	7.64837668914813e-05	0.0187445189228012	0.587420284575605	0.705546102146487	0.478224777728486	-0.227321324418001	1	156889964	F	II	C1orf92	TSS1500	shore	TSS1500-shore	chr1:156890243-156890806	NA	NA				High-ICI hypermethylated probes
cg05027533	-0.18740777734351	0.560803631379393	-4.29409932159879	7.66262114143286e-05	0.0187681972820959	0.585619231614889	0.691635475939956	0.504227698596446	-0.18740777734351	2	153290479	F	II	FMNL2	Body	opensea	Body-opensea		NA	TRUE		rs12693362		High-ICI hypermethylated probes
cg21449429	-0.255301373274214	0.492683566815035	-4.29329560788732	7.68311813285796e-05	0.0187835836110386	0.583033514701477	0.670912827402693	0.415611454128479	-0.255301373274214	12	130605112	F	I		IGR	opensea	IGR-opensea		NA	NA		rs2134342		High-ICI hypermethylated probes
cg10715460	-0.172009797780108	0.646665107661461	-4.29319040657392	7.68580500959203e-05	0.0187835836110386	0.582695076848419	0.766747419319273	0.594737621539165	-0.172009797780108	17	21278879	R	II	KCNJ12	TSS1500	shore	TSS1500-shore	chr17:21279506-21281574	NA	NA				High-ICI hypermethylated probes
cg17401435	-0.113966586177636	0.306684701970981	-4.29313385701434	7.68724968185189e-05	0.0187835836110386	0.582513155732678	0.386246281000651	0.272279694823015	-0.113966586177636	11	63887426	F	II	MACROD1	Body	island	Body-island	chr11:63887355-63887600	NA	NA		rs79029161	rs35721664	High-ICI hypermethylated probes
cg10103391	-0.205969873275751	0.497101357937354	-4.29248729243541	7.70378625707605e-05	0.0188015540567063	0.580433224864325	0.640891646827972	0.434921773552221	-0.205969873275751	7	5647658	F	II		IGR	island	IGR-island	chr7:5647657-5647984	NA	TRUE		rs75508738		High-ICI hypermethylated probes
cg04131468	-0.183893331967332	0.274718024844009	-4.29185609736907	7.71996310855583e-05	0.0188157962141159	0.57840287967763	0.40309638867026	0.219203056702928	-0.183893331967332	17	12694449	F	II	RICH2	Body	shore	Body-shore	chr17:12692737-12693690	NA	NA				High-ICI hypermethylated probes
cg00193613	-0.226534764778102	0.591153419079335	-4.29179587910646	7.72150816292311e-05	0.0188157962141159	0.578209184911651	0.749300330339519	0.522765565561417	-0.226534764778102	17	77042810	R	II	C1QTNF1	Body	shore	Body-shore	chr17:77043741-77044489	NA	NA				High-ICI hypermethylated probes
cg16614527	0.228754074517014	0.410409590222398	4.29172194834232	7.72340545799996e-05	0.0188157962141159	0.577971385030151	0.250713349521841	0.479467424038855	0.228754074517014	12	50400225	R	II	RACGAP1	Body	opensea	Body-opensea		NA	TRUE				Low-ICI hypermethylated probes
cg17894088	-0.135135177861195	0.282326399202827	-4.29056853254825	7.75306449765744e-05	0.0188417768702512	0.574261650630047	0.376666051671963	0.241530873810768	-0.135135177861195	8	136470817	F	II	KHDRBS3	Body	shore	Body-shore	chr8:136468939-136470342	TRUE	NA				High-ICI hypermethylated probes
cg14057303	0.124902390459288	0.255005717867428	4.29041197830585	7.75709867486936e-05	0.0188417768702512	0.573758161322522	0.167809709433586	0.292712099892873	0.124902390459288	9	109683834	F	II	MIR548Q	Body	opensea	Body-opensea		NA	TRUE				Low-ICI hypermethylated probes
cg01152015	-0.150179868291371	0.454778411988255	-4.29040919062301	7.75717052793313e-05	0.0188417768702512	0.57374919602021	0.559620961550156	0.409441093258785	-0.150179868291371	11	133820837	R	II	IGSF9B	Body	opensea	Body-opensea		TRUE	TRUE				High-ICI hypermethylated probes
cg18182844	-0.196305244613496	0.443244606669501	-4.29022355930127	7.76195666789979e-05	0.0188417768702512	0.573152204310796	0.58028789064496	0.383982646031464	-0.196305244613496	3	52828292	R	II	ITIH3	TSS1500	opensea	TSS1500-opensea		NA	NA				High-ICI hypermethylated probes
cg07211044	0.209692978042886	0.774220684060609	4.29017848663216	7.76311921157866e-05	0.0188417768702512	0.573007252125194	0.627831246558971	0.837524224601858	0.209692978042886	8	60032983	R	I	TOX	TSS1500	shore	TSS1500-shore	chr8:60030134-60032356	NA	NA				Low-ICI hypermethylated probes
cg15077792	-0.219748713417819	0.460059350859764	-4.28992743020587	7.7695977214889e-05	0.0188417768702512	0.572199876364467	0.613468830038242	0.393720116620423	-0.219748713417819	10	73324481	R	II	CDH23	Body	opensea	Body-opensea		NA	TRUE				High-ICI hypermethylated probes
cg07412254	-0.169948519798564	0.589172802709586	-4.28981155344086	7.77258969388886e-05	0.0188417768702512	0.571827234284917	0.707816108984055	0.537867589185491	-0.169948519798564	2	121223534	F	II	LOC84931	Body	opensea	Body-opensea		NA	TRUE				High-ICI hypermethylated probes
cg06089960	-0.193346847176684	0.72201936132957	-4.28897044071045	7.79434108132345e-05	0.0188417768702512	0.569122486963963	0.856997348981217	0.663650501804533	-0.193346847176684	1	1498081	R	II	SSU72	Body	shore	Body-shore	chr1:1496761-1496986	NA	NA			rs75103473	High-ICI hypermethylated probes
cg08289177	0.126337486185136	0.249077169514288	4.28868915644535	7.80162836195854e-05	0.0188417768702512	0.568218023760431	0.160879301800136	0.287216787985272	0.126337486185136	19	42932846	F	II	CXCL17	3'UTR	opensea	3'UTR-opensea		NA	NA				Low-ICI hypermethylated probes
cg01247127	-0.210746722274207	0.539630169531916	-4.28864811394974	7.80269221078811e-05	0.0188417768702512	0.568086054901692	0.686755239798816	0.476008517524609	-0.210746722274207	20	1538366	R	II	SIRPD	TSS200	opensea	TSS200-opensea		NA	NA			rs73570807	High-ICI hypermethylated probes
cg26810157	-0.11858889699164	0.19291609923897	-4.28858246534731	7.80439415958411e-05	0.0188417768702512	0.567874968325586	0.275704574497285	0.157115677505644	-0.11858889699164	15	57579076	R	II	TCF12	3'UTR	opensea	3'UTR-opensea		NA	TRUE				High-ICI hypermethylated probes
cg03251454	-0.314097237309869	0.54668246123236	-4.28816932467049	7.81511317415843e-05	0.0188417768702512	0.566546590698303	0.765957891052458	0.451860653742588	-0.314097237309869	7	155049476	F	II		IGR	opensea	IGR-opensea		TRUE	NA			rs79195280	High-ICI hypermethylated probes
cg01115565	-0.208317438702322	0.717086547990852	-4.28810500631262	7.81678321368274e-05	0.0188417768702512	0.566339792362373	0.862515703311341	0.654198264609019	-0.208317438702322	1	29584222	R	II	PTPRU	Body	shore	Body-shore	chr1:29585897-29586598	NA	TRUE				High-ICI hypermethylated probes
cg19159092	-0.124481022853034	0.419438869217542	-4.28792394124372	7.82148646958362e-05	0.0188417768702512	0.565757634384861	0.506340715360226	0.381859692507192	-0.124481022853034	1	856059	F	II	FLJ39609	TSS1500	shore	TSS1500-shore	chr1:854765-854973	NA	NA		rs28534711		High-ICI hypermethylated probes
cg23015468	-0.11946847778392	0.261027407596713	-4.28748759595708	7.83283206607719e-05	0.0188580151951342	0.56435475094691	0.344429929823224	0.224961452039303	-0.11946847778392	7	150678915	F	II		IGR	shelf	IGR-shelf	chr7:150674737-150675026	NA	NA		rs13224371		High-ICI hypermethylated probes
cg04600000	0.215177083320654	0.553725266296408	4.28678873285771	7.85103684710178e-05	0.0188866211421911	0.562107994262833	0.403507302468781	0.618684385789435	0.215177083320654	13	114830313	R	I	RASA3	Body	opensea	Body-opensea		NA	TRUE				Low-ICI hypermethylated probes
cg12989057	-0.285731945489322	0.647257673234101	-4.28667752792257	7.85393743136e-05	0.0188866211421911	0.561750500507382	0.846730918198345	0.560998972709023	-0.285731945489322	13	53649596	R	II		IGR	opensea	IGR-opensea		NA	TRUE				High-ICI hypermethylated probes
cg08621846	-0.122166970026536	0.309968509840465	-4.28614415098202	7.86786411741706e-05	0.0189048110789012	0.560035899447844	0.395254885142009	0.273087915115473	-0.122166970026536	8	125383532	F	II	TMEM65	Body	shore	Body-shore	chr8:125383817-125385437	NA	NA				High-ICI hypermethylated probes
cg17204557	-0.157553873564788	0.386047865368487	-4.28475252806949	7.90431310059379e-05	0.0189521178386052	0.555562847182018	0.496038305404283	0.338484431839494	-0.157553873564789	2	121223909	R	II	LOC84931	Body	opensea	Body-opensea		NA	TRUE				High-ICI hypermethylated probes
cg22720392	-0.319734337723763	0.516845144052252	-4.28423701784284	7.91785682632095e-05	0.0189734829412283	0.553906033604	0.740055908123558	0.420321570399795	-0.319734337723763	1	3133857	R	I	PRDM16	Body	opensea	Body-opensea		NA	NA				High-ICI hypermethylated probes
cg01783554	-0.235131270937646	0.648381344347336	-4.28360536774287	7.93448259767354e-05	0.0190022042122506	0.551876084168831	0.812529590096259	0.577398319158613	-0.235131270937647	8	101872421	R	II		IGR	opensea	IGR-opensea		NA	TRUE				High-ICI hypermethylated probes
cg07437546	-0.238784304580394	0.471646584494965	-4.28272026829149	7.95783657119265e-05	0.0190358702082607	0.549031858373102	0.638345061277504	0.39956075669711	-0.238784304580394	6	91096062	F	II		IGR	opensea	IGR-opensea		NA	TRUE		rs72929828	rs76598886	High-ICI hypermethylated probes
cg17382990	-0.21145153552749	0.665699215608157	-4.28183965099743	7.98113860176481e-05	0.0190548201435539	0.546202313922136	0.813316325316028	0.601864789788538	-0.211451535527491	11	1857531	R	I	SYT8	Body	opensea	Body-opensea		NA	NA				High-ICI hypermethylated probes
cg08315483	-0.119260200407286	0.28256523734137	-4.28091003560637	8.00580915036529e-05	0.0190775240329094	0.543215633003705	0.365822358380419	0.246562157973133	-0.119260200407286	16	85682651	R	II	KIAA0182	Body	shore	Body-shore	chr16:85684107-85684491	NA	NA				High-ICI hypermethylated probes
cg08951638	-0.16243115083209	0.363006984850328	-4.28052470722494	8.0160568887945e-05	0.0190775240329094	0.54197773547028	0.476402316563296	0.313971165731206	-0.16243115083209	5	141706213	F	II		IGR	shore	IGR-shore	chr5:141703749-141705023	NA	TRUE		rs76516069		High-ICI hypermethylated probes
cg23014487	-0.22010009032529	0.384857649280526	-4.28035914703469	8.02046384803016e-05	0.0190775240329094	0.541445876754881	0.538512429318936	0.318412338993646	-0.22010009032529	1	20669407	F	II	VWA5B1	Body	shore	Body-shore	chr1:20669566-20670018	NA	NA		rs34950437		High-ICI hypermethylated probes
cg01534527	0.169786971270395	0.323601863170642	4.27901527391388	8.05632296358964e-05	0.0191200004158018	0.537129075271948	0.205071336057347	0.374858307327742	0.169786971270395	3	38003247	R	II	CTDSPL	Body	opensea	Body-opensea		NA	TRUE			rs2364776	Low-ICI hypermethylated probes
cg07183799	0.223705023143262	0.577850189618104	4.27880676956674	8.06190051997235e-05	0.0191200004158018	0.536459373703893	0.421678758367148	0.64538378151041	0.223705023143262	13	107214285	R	II	ARGLU1	Body	opensea	Body-opensea		NA	TRUE				Low-ICI hypermethylated probes
cg24703533	-0.184194063508613	0.334225960677163	-4.27873142853686	8.06391683925151e-05	0.0191200004158018	0.536217387350187	0.462814269164307	0.278620205655695	-0.184194063508613	17	45055318	R	II		IGR	island	IGR-island	chr17:45055317-45056838	NA	NA				High-ICI hypermethylated probes
cg08947894	-0.164950236223497	0.583889407219931	-4.27702124648434	8.10981779631195e-05	0.0191683494071857	0.53072503512825	0.69904334571558	0.534093109492083	-0.164950236223497	1	155044345	F	II		IGR	shore	IGR-shore	chr1:155043412-155043922	NA	NA				High-ICI hypermethylated probes
cg02880444	-0.111105869968282	0.249845567343571	-4.27648659795183	8.1242197055612e-05	0.0191806692403524	0.529008194563871	0.327410042604447	0.216304172636165	-0.111105869968282	17	29860851	F	I	RAB11FIP4	3'UTR	opensea	3'UTR-opensea		TRUE	NA		rs78353841		High-ICI hypermethylated probes
cg24723373	-0.187583893309916	0.568154743874633	-4.27622729901088	8.13121343138335e-05	0.0191817011042667	0.528175581803219	0.699109537317404	0.511525644007488	-0.187583893309916	7	55267262	F	II	EGFR	Body	opensea	Body-opensea		NA	TRUE				High-ICI hypermethylated probes
cg02861293	-0.148548604014941	0.746052708162242	-4.27538650993776	8.15393120001469e-05	0.0192242189327416	0.525475961576541	0.849756450587767	0.701207846572826	-0.148548604014941	1	160011013	F	II	KCNJ10	3'UTR	opensea	3'UTR-opensea		NA	NA				High-ICI hypermethylated probes
cg18098769	-0.251365998960166	0.667821519707326	-4.27496073939448	8.16545886442734e-05	0.019230986357909	0.524108986898132	0.843303443509706	0.59193744454954	-0.251365998960166	17	76471562	F	II	DNAH17	Body	shore	Body-shore	chr17:76472296-76472533	NA	NA				High-ICI hypermethylated probes
cg03361664	-0.225559786955623	0.589804679548096	-4.27470702364001	8.17233570674091e-05	0.019230986357909	0.523294440573399	0.747270945913343	0.52171115895772	-0.225559786955623	11	3187760	R	II	OSBPL5	TSS1500	shore	TSS1500-shore	chr11:3186131-3186768	NA	NA				High-ICI hypermethylated probes
cg26458545	0.218525780101203	0.450467431531571	4.27460482144219	8.17510743817598e-05	0.019230986357909	0.522966330214993	0.297911698253373	0.516437478354575	0.218525780101202	15	63100072	R	II	TLN2	Body	opensea	Body-opensea		NA	TRUE			rs56113703	Low-ICI hypermethylated probes
cg10405729	-0.229749023672837	0.539665296780541	-4.27458720648212	8.17558524956157e-05	0.019230986357909	0.522909779453444	0.700056124627616	0.470307100954779	-0.229749023672837	11	58483730	F	II	GLYAT	Body	opensea	Body-opensea		NA	NA				High-ICI hypermethylated probes
cg05652381	0.202921357090935	0.332840525083195	4.27403212756289	8.19065585615998e-05	0.0192336056465327	0.521127820842484	0.191178445604618	0.394099802695553	0.202921357090935	3	138043797	F	II	TXNDC6	5'UTR	opensea	5'UTR-opensea		NA	NA				Low-ICI hypermethylated probes
cg17069828	-0.215999845315803	0.613442020202049	-4.27402724882956	8.19078843530153e-05	0.0192336056465327	0.521112159234461	0.764234365045157	0.548234519729354	-0.215999845315803	8	119476471	F	II	SAMD12	Body	opensea	Body-opensea		NA	TRUE				High-ICI hypermethylated probes
cg07014349	-0.147326678341029	0.664698623687348	-4.27359630847395	8.20250743516192e-05	0.0192390610532195	0.519728797233512	0.767549323661273	0.620222645320245	-0.147326678341029	1	35220521	R	II	GJB5	TSS200	opensea	TSS200-opensea		NA	NA				High-ICI hypermethylated probes
cg18280758	-0.215416693654189	0.441123720117987	-4.27292950993314	8.22067249542509e-05	0.0192457254402254	0.517588438211059	0.591508959084119	0.37609226542993	-0.215416693654189	1	31885025	R	II	SERINC2	TSS1500	shore	TSS1500-shore	chr1:31885794-31887010	NA	TRUE				High-ICI hypermethylated probes
cg02128417	0.168992360997942	0.739452810704886	4.2729200622403	8.22093015213303e-05	0.0192457254402254	0.517558113176361	0.621477011517644	0.790469372515585	0.168992360997941	5	34672436	F	II	RAI14	5'UTR	opensea	5'UTR-opensea		NA	TRUE				Low-ICI hypermethylated probes
cg15778400	-0.202873064996755	0.411213810181361	-4.27280213834762	8.22414682349701e-05	0.0192457254402254	0.517179605884582	0.552842176311171	0.349969111314416	-0.202873064996755	3	9259313	F	II	SRGAP3	Body	opensea	Body-opensea		NA	NA				High-ICI hypermethylated probes
cg25445707	-0.155078305153007	0.687252592291293	-4.27154662931018	8.25846994274345e-05	0.0193137549285323	0.51315003432804	0.795514805322637	0.64043650016963	-0.155078305153007	3	46719086	R	II	ALS2CL	TSS200	opensea	TSS200-opensea		NA	NA				High-ICI hypermethylated probes
cg18397882	-0.187146648384997	0.312709082550225	-4.27127767200649	8.26584078953872e-05	0.0193137549285323	0.512286886326598	0.443358629535977	0.25621198115098	-0.187146648384997	19	19050971	R	II	HOMER3	5'UTR	shore	5'UTR-shore	chr19:19051019-19051939	NA	NA				High-ICI hypermethylated probes
cg10659480	-0.209105255705327	0.335785122901292	-4.2712220551766	8.26736578134649e-05	0.0193137549285323	0.512108401929743	0.481764263676709	0.272659007971382	-0.209105255705327	3	34055800	F	II		IGR	opensea	IGR-opensea		NA	TRUE				High-ICI hypermethylated probes
cg10336790	-0.1511293719421	0.161001541970273	-4.27099727012216	8.27353208689158e-05	0.0193171408290556	0.51138703765506	0.266506952571362	0.115377580629262	-0.1511293719421	7	112725899	R	II	GPR85	5'UTR	opensea	5'UTR-opensea		NA	NA				High-ICI hypermethylated probes
cg25418528	-0.236050340091526	0.472014537255479	-4.27053770297387	8.28615285364948e-05	0.0193233110129794	0.509912283906632	0.636804397319375	0.400754057227849	-0.236050340091526	22	21381565	R	II	P2RX6	3'UTR	opensea	3'UTR-opensea		TRUE	TRUE				High-ICI hypermethylated probes
cg16231394	0.171284357482066	0.477305112517935	4.27014786106838	8.2968734744788e-05	0.0193233110129794	0.508661338477269	0.357729240313473	0.52901359779554	0.171284357482067	5	91137099	F	II		IGR	opensea	IGR-opensea		NA	TRUE				Low-ICI hypermethylated probes
cg23119049	-0.168562336356983	0.447104017745736	-4.26975233964276	8.30776405995712e-05	0.0193233110129794	0.507392224217434	0.564779611051554	0.396217274694571	-0.168562336356983	10	73572537	F	II	CDH23	Body	opensea	Body-opensea		NA	TRUE				High-ICI hypermethylated probes
cg22676000	-0.218859568119157	0.534141906057546	-4.26946728703894	8.31562152816264e-05	0.0193233110129794	0.506477607495738	0.686930661159599	0.468071093040441	-0.218859568119158	19	42259081	F	II	CEACAM6	TSS1500	opensea	TSS1500-opensea		NA	NA				High-ICI hypermethylated probes
cg08886020	-0.251003380211288	0.391021804540003	-4.26939117030525	8.31772090581856e-05	0.0193233110129794	0.506233385112013	0.566250579404487	0.315247199193199	-0.251003380211288	16	1080388	F	I		IGR	island	IGR-island	chr16:1080267-1080732	NA	NA				High-ICI hypermethylated probes
cg12430302	-0.165596898788156	0.57011916332812	-4.26926750224513	8.32113289641392e-05	0.0193233110129794	0.505836597594874	0.685724545500984	0.520127646712827	-0.165596898788157	1	9424575	R	II	SPSB1	Body	shelf	Body-shelf	chr1:9427507-9427734	NA	NA				High-ICI hypermethylated probes
cg27614309	-0.153177130767232	0.50569916553141	-4.26876913736857	8.33489653169906e-05	0.0193233110129794	0.504237655577196	0.612634143614194	0.459457012846962	-0.153177130767232	16	85478580	F	II		IGR	opensea	IGR-opensea		TRUE	TRUE				High-ICI hypermethylated probes
cg03876340	-0.247310949449848	0.49663103486102	-4.26841482585838	8.34469521674287e-05	0.0193290138763113	0.503100945373231	0.669282075042989	0.421971125593141	-0.247310949449848	3	155570582	F	II	SLC33A1	Body	shore	Body-shore	chr3:155572358-155572604	NA	TRUE				High-ICI hypermethylated probes
cg00262489	-0.259033361768909	0.6909693341235	-4.2680328755954	8.35527080849682e-05	0.0193366570961854	0.501875614562304	0.87180394516972	0.612770583400811	-0.259033361768909	4	153091309	F	II		IGR	opensea	IGR-opensea		NA	TRUE		rs2897464		High-ICI hypermethylated probes
cg25448856	0.118898783568316	0.805036563892586	4.26795464951494	8.35743837027398e-05	0.0193366570961854	0.501624664743965	0.722031752722252	0.840930536290569	0.118898783568316	12	93172875	R	II	EEA1	Body	opensea	Body-opensea		NA	TRUE				Low-ICI hypermethylated probes
cg04942251	-0.226515476202035	0.327562341354919	-4.26731129281384	8.37528584730192e-05	0.0193560796382741	0.499560855570565	0.485695787005397	0.259180310803361	-0.226515476202035	11	63687247	F	I		IGR	shore	IGR-shore	chr11:63685489-63685968	NA	NA		rs78100947		High-ICI hypermethylated probes
cg11726288	-0.19099704157622	0.657111522902977	-4.26647805738535	8.3984558530427e-05	0.0193986803816873	0.496888160585907	0.790449080229772	0.599452038653552	-0.19099704157622	1	11902283	F	II	CLCN6	3'UTR	shelf	3'UTR-shelf	chr1:11898393-11898732	NA	TRUE				High-ICI hypermethylated probes
cg10064525	-0.187405504210423	0.706153322554611	-4.2646612550754	8.44919240083892e-05	0.0194848439550642	0.491061434218171	0.836983580210944	0.649578076000521	-0.187405504210423	1	109262682	F	II	FNDC7	Body	opensea	Body-opensea		TRUE	TRUE				High-ICI hypermethylated probes
cg23206745	-0.140728887169982	0.495144045588574	-4.26459422203793	8.45107007218839e-05	0.0194848439550642	0.490846473148757	0.593388740405354	0.452659853235372	-0.140728887169982	11	61976482	F	II	SCGB2A1	Body	opensea	Body-opensea		NA	NA				High-ICI hypermethylated probes
cg09011458	-0.18071769767177	0.720724563203632	-4.26446142456658	8.45479107752599e-05	0.0194848439550642	0.490420623949129	0.846885974785811	0.666168277114041	-0.18071769767177	14	104743900	R	II		IGR	opensea	IGR-opensea		NA	NA				High-ICI hypermethylated probes
cg14469209	0.221127755864908	0.571473760741779	4.26351863740599	8.48125393715494e-05	0.0195184781604416	0.487397517853505	0.417101553817221	0.638229309682129	0.221127755864908	14	57370339	R	II	OTX2OS1	Body	opensea	Body-opensea		NA	TRUE				Low-ICI hypermethylated probes
cg27578977	-0.23928619745433	0.527153021921848	-4.26307133541776	8.49383728616257e-05	0.0195184781604416	0.485963328293975	0.694201876748456	0.454915679294126	-0.23928619745433	20	23018266	R	II		IGR	shore	IGR-shore	chr20:23015716-23016879	NA	NA				High-ICI hypermethylated probes
cg08656333	-0.260871834976696	0.616541494955739	-4.26305798391707	8.4942131648392e-05	0.0195184781604416	0.485920520333225	0.798659568430036	0.53778773345334	-0.260871834976696	3	194218174	R	II		IGR	opensea	IGR-opensea		NA	TRUE				High-ICI hypermethylated probes
cg19172278	-0.161524204768335	0.269294999301939	-4.26298016997735	8.49640414669771e-05	0.0195184781604416	0.485671032350935	0.382057179989267	0.220532975220933	-0.161524204768335	7	152623304	F	II		IGR	island	IGR-island	chr7:152622343-152623305	NA	NA		rs10225950		High-ICI hypermethylated probes
cg15702185	-0.140903702248049	0.594323588663305	-4.2628090716953	8.50122363734029e-05	0.0195184781604416	0.485122462690726	0.692690324194962	0.551786621946913	-0.140903702248049	22	46507771	R	II	MIRLET7A3	TSS1500	opensea	TSS1500-opensea		NA	TRUE				High-ICI hypermethylated probes
cg17753124	-0.111422461861272	0.29672628937303	-4.26271957397243	8.50374566447565e-05	0.0195184781604416	0.484835522261582	0.374511781615805	0.263089319754533	-0.111422461861272	19	13259872	R	II	IER2	TSS1500	shore	TSS1500-shore	chr19:13260562-13264924	NA	NA				High-ICI hypermethylated probes
cg17223748	-0.165126578871854	0.666898055022068	-4.2624668131354	8.51087233961324e-05	0.0195184781604416	0.484025156345971	0.782175100649589	0.617048521777735	-0.165126578871854	11	1960093	R	I		IGR	shore	IGR-shore	chr11:1958934-1959247	NA	NA				High-ICI hypermethylated probes
cg07629165	-0.136786348319755	0.640835391271257	-4.26241689310372	8.51228053763344e-05	0.0195184781604416	0.483865112556943	0.736327747645425	0.59954139932567	-0.136786348319755	21	45845365	F	II	TRPM2	Body	island	Body-island	chr21:45844992-45845693	NA	NA				High-ICI hypermethylated probes
cg14997707	0.118816870940702	0.185988701512389	4.26194514437914	8.52559932009384e-05	0.0195380782717445	0.482352729037102	0.103041074629258	0.22185794556996	0.118816870940702	7	93853120	F	II		IGR	opensea	IGR-opensea		NA	TRUE				Low-ICI hypermethylated probes
cg03147838	-0.107406861766465	0.218874103278479	-4.26168477101027	8.53295905852121e-05	0.0195382861158032	0.481518030143165	0.293856252058842	0.186449390292377	-0.107406861766465	1	32226935	F	II	BAI2	5'UTR	shore	5'UTR-shore	chr1:32228347-32230252	TRUE	NA				High-ICI hypermethylated probes
cg23457901	0.148341050259873	0.592835569088498	4.26144603785725	8.53971253851157e-05	0.0195382861158032	0.480752726489492	0.489276722680662	0.637617772940535	0.148341050259873	6	52402140	R	II	TRAM2	Body	opensea	Body-opensea		NA	TRUE				Low-ICI hypermethylated probes
cg04100395	-0.218456239832252	0.694142669419227	-4.26137081149134	8.54184168003757e-05	0.0195382861158032	0.480511578611164	0.846649855717215	0.628193615884962	-0.218456239832253	17	6984187	R	II	CLEC10A	TSS1500	opensea	TSS1500-opensea		NA	NA				High-ICI hypermethylated probes
cg19451673	-0.130908412895418	0.201265052340338	-4.26117448662248	8.54740071853967e-05	0.0195382861158032	0.479882243405223	0.292653944361668	0.16174553146625	-0.130908412895418	12	48398730	F	II	COL2A1	TSS1500	island	TSS1500-island	chr12:48397889-48398731	NA	NA				High-ICI hypermethylated probes
cg00568555	-0.165971776220237	0.399249048222599	-4.2610987996998	8.54954477115476e-05	0.0195382861158032	0.479639626590945	0.51511613728201	0.349144361061773	-0.165971776220237	19	35520846	R	II	SCN1B	TSS1500	shore	TSS1500-shore	chr19:35521162-35522051	NA	NA				High-ICI hypermethylated probes
cg07714420	-0.135336463878838	0.431387782146858	-4.26035292318169	8.57070187250377e-05	0.0195638401198669	0.477248806739841	0.525867955043405	0.390531491164567	-0.135336463878838	16	85123342	R	II	KIAA0513	3'UTR	opensea	3'UTR-opensea		NA	NA				High-ICI hypermethylated probes
cg06684407	-0.169206277331606	0.497659040140065	-4.26027011059254	8.57305402238737e-05	0.0195638401198669	0.476983373093467	0.615784177145149	0.446577899813542	-0.169206277331606	21	46356806	R	I	C21orf67	Body	shelf	Body-shelf	chr21:46359647-46360423	NA	NA				High-ICI hypermethylated probes
cg01518259	-0.115532138932046	0.329330051356709	-4.25995017724354	8.58214707673004e-05	0.0195638401198669	0.47595793546444	0.409984563441344	0.294452424509299	-0.115532138932046	16	32323497	F	II		IGR	shore	IGR-shore	chr16:32321272-32322237	NA	NA		rs2550106		High-ICI hypermethylated probes
cg00701706	-0.123333395174233	0.277996463088488	-4.25982423200749	8.58572922687451e-05	0.0195638401198669	0.475554270969377	0.364097135191254	0.240763740017022	-0.123333395174233	17	72931632	F	II	OTOP3	TSS1500	shore	TSS1500-shore	chr17:72931729-72932601	TRUE	NA				High-ICI hypermethylated probes
cg21129531	-0.188819346061079	0.390727163162704	-4.25966712145348	8.59019982184793e-05	0.0195638401198669	0.475050727198936	0.522544442488363	0.333725096427284	-0.188819346061079	7	127670703	F	II	LRRC4	5'UTR	shore	5'UTR-shore	chr7:127671158-127672853	TRUE	NA				High-ICI hypermethylated probes
cg14278148	0.214611135256371	0.586036517110304	4.25952776882275	8.59416700664683e-05	0.0195638401198669	0.474604105550661	0.436213649101139	0.65082478435751	0.214611135256371	9	114663626	F	II	UGCG	Body	shelf	Body-shelf	chr9:114658618-114659773	NA	NA				Low-ICI hypermethylated probes
cg26386826	-0.211750061566929	0.580686855424339	-4.25910719065092	8.60615110944542e-05	0.0195802368847041	0.473256205791599	0.728512370103139	0.51676230853621	-0.211750061566929	3	58555510	R	II	FAM107A	Body	opensea	Body-opensea		NA	NA			rs11539084	High-ICI hypermethylated probes
cg07398352	-0.161400236659522	0.591165596256548	-4.25878510592563	8.61533968457114e-05	0.0195902587432742	0.472224008346027	0.703841233169799	0.542440996510277	-0.161400236659522	1	157085163	F	II		IGR	opensea	IGR-opensea		NA	TRUE				High-ICI hypermethylated probes
cg22325828	-0.138991122326974	0.69637968903627	-4.25784595885161	8.64218654929399e-05	0.0196404000487579	0.469214501643472	0.793411227264535	0.654420104937561	-0.138991122326974	17	41018218	R	II	LOC90586	TSS1500	opensea	TSS1500-opensea		NA	NA				High-ICI hypermethylated probes
cg06225923	-0.386392967065824	0.67449950649885	-4.25712406490971	8.66287816991001e-05	0.0196580061384811	0.466901402061645	0.944245540110841	0.557852573045017	-0.386392967065824	16	88797506	F	I	FAM38A	Body	shelf	Body-shelf	chr16:88793071-88793877	NA	NA		rs75331595	rs76141885	High-ICI hypermethylated probes
cg14174336	-0.146169106913324	0.373651354503368	-4.25711510570245	8.66313526956484e-05	0.0196580061384811	0.466872696068901	0.475693938574934	0.32952483166161	-0.146169106913324	16	67208654	R	II	NOL3	Body	island	Body-island	chr16:67208067-67208678	NA	NA				High-ICI hypermethylated probes
cg13955758	-0.209220174007561	0.538784153783831	-4.25690612821443	8.66913433728185e-05	0.0196580061384811	0.466203124292468	0.684843520543826	0.475623346536265	-0.209220174007561	9	122790026	R	II		IGR	opensea	IGR-opensea		NA	TRUE				High-ICI hypermethylated probes
cg05716278	-0.265589854280792	0.333199762417835	-4.25628104346762	8.68710260593608e-05	0.0196878493735394	0.46420042359647	0.518611547481785	0.253021693200993	-0.265589854280792	10	6221273	F	II	PFKFB3	Body	opensea	Body-opensea		NA	NA		rs12217915		High-ICI hypermethylated probes
cg08164233	-0.158569346696482	0.255760795842856	-4.2559043774007	8.69794746641349e-05	0.0196951144963076	0.462993696591006	0.366460151083796	0.207890804387314	-0.158569346696482	13	37394589	R	II	RFXAP	Body	shore	Body-shore	chr13:37393213-37394092	NA	NA				High-ICI hypermethylated probes
cg20316549	-0.157837064243278	0.309363351911925	-4.25583568087998	8.69992677481292e-05	0.0196951144963076	0.462773618742446	0.419551491100628	0.26171442685735	-0.157837064243278	7	156810507	R	II		IGR	shore	IGR-shore	chr7:156810572-156814593	NA	NA				High-ICI hypermethylated probes
cg08006672	-0.308815813491034	0.579185137900348	-4.25527695288986	8.71604130782006e-05	0.0197154605258535	0.460983727692583	0.794773535997862	0.485957722506828	-0.308815813491034	16	85427738	R	I		IGR	opensea	IGR-opensea		TRUE	NA				High-ICI hypermethylated probes
cg27440002	0.184725943460676	0.362249996800009	4.2551903152721	8.71854265964083e-05	0.0197154605258535	0.460706193302933	0.2332903758935	0.418016319354175	0.184725943460676	5	132208244	F	II	LEAP2	TSS1500	opensea	TSS1500-opensea		NA	NA				Low-ICI hypermethylated probes
cg07893801	-0.26365990820997	0.416373396093267	-4.25476471147679	8.73084058318856e-05	0.0197237079496812	0.459342856371737	0.600437860315322	0.336777952105352	-0.26365990820997	20	39767358	R	II	PLCG1	Body	shore	Body-shore	chr20:39765229-39766832	NA	NA				High-ICI hypermethylated probes
cg09581756	-0.217135014059944	0.346924356552017	-4.2543046589498	8.74415286955326e-05	0.0197297958570615	0.457869243703804	0.498509177688204	0.28137416362826	-0.217135014059944	1	11906187	F	II	NPPA	Body	opensea	Body-opensea		NA	NA				High-ICI hypermethylated probes
cg22537334	-0.205666800381678	0.502829399234321	-4.25404831686583	8.75157905404732e-05	0.01973285906189	0.457048177429797	0.646408108934738	0.44074130855306	-0.205666800381678	15	70354691	R	II	TLE3	Body	opensea	Body-opensea		TRUE	NA				High-ICI hypermethylated probes
cg10919098	-0.112502175035444	0.749570045816487	-4.2538851819217	8.75630823506959e-05	0.01973285906189	0.456525666979726	0.828109300086514	0.71560712505107	-0.112502175035444	11	66388426	R	II	RBM14	Body	shelf	Body-shelf	chr11:66383571-66385047	NA	NA				High-ICI hypermethylated probes
cg06131936	-0.140834208145423	0.607200318292821	-4.25375759898353	8.76000851586239e-05	0.01973285906189	0.456117033987268	0.705518539073588	0.564684330928165	-0.140834208145423	11	3187271	R	II	OSBPL5	TSS1500	shore	TSS1500-shore	chr11:3186131-3186768	NA	NA				High-ICI hypermethylated probes
cg09166556	-0.280267895822227	0.586284057849241	-4.25321894192605	8.77564791342646e-05	0.01973285906189	0.454391844566405	0.781942777574192	0.501674881751965	-0.280267895822227	1	156724277	R	II		IGR	shelf	IGR-shelf	chr1:156720747-156722069	NA	NA				High-ICI hypermethylated probes
cg03107336	0.17440685714402	0.291527349244938	4.25317453865005	8.77693833027293e-05	0.01973285906189	0.454249636217838	0.169771618785905	0.344178475929925	0.17440685714402	11	6325202	F	II		IGR	opensea	IGR-opensea		NA	TRUE		rs11827225		Low-ICI hypermethylated probes
cg26596975	-0.15273399931427	0.369107843668672	-4.25309536389272	8.77923970902058e-05	0.01973285906189	0.453996068606754	0.475733465831464	0.322999466517194	-0.15273399931427	7	75189250	R	I	HIP1	Body	island	Body-island	chr7:75189055-75189289	NA	NA				High-ICI hypermethylated probes
cg05018034	-0.229224599397963	0.641096374532779	-4.25261656412119	8.79316951882195e-05	0.0197524367633337	0.452462697643322	0.801121094867206	0.571896495469243	-0.229224599397963	20	23014087	F	II		IGR	shore	IGR-shore	chr20:23015716-23016879	NA	NA		rs35552862		High-ICI hypermethylated probes
cg26233253	-0.183008197708277	0.424748357616705	-4.25212566440688	8.80747365147724e-05	0.0197524367633337	0.450890662682416	0.552508797526256	0.36950059981798	-0.183008197708277	22	31032613	F	II	SLC35E4	1stExon	shore	1stExon-shore	chr22:31031358-31032059	NA	NA				High-ICI hypermethylated probes
cg08008144	-0.166736319447862	0.329298557642993	-4.2518010001563	8.81694633379704e-05	0.0197524367633337	0.449851020716482	0.445699384427349	0.278963064979487	-0.166736319447862	8	1983127	R	II		IGR	opensea	IGR-opensea		NA	NA				High-ICI hypermethylated probes
cg14950344	0.255003787937751	0.417612631037606	4.25092967637318	8.84241778530626e-05	0.0197524367633337	0.447061051380362	0.239591118703705	0.494594906641456	0.255003787937751	17	44810162	F	II	NSF	Body	opensea	Body-opensea		NA	TRUE				Low-ICI hypermethylated probes
cg04270347	-0.217560427291435	0.391597811162222	-4.25081674487668	8.84572434693935e-05	0.0197524367633337	0.446699466147668	0.543479618893979	0.325919191602544	-0.217560427291435	19	46012688	F	II	VASP	Body	shore	Body-shore	chr19:46009778-46011060	NA	NA				High-ICI hypermethylated probes
cg07745915	-0.211052843268545	0.590964161906669	-4.25067640159074	8.84983518244487e-05	0.0197524367633337	0.446250120024672	0.738302939282824	0.527250096014278	-0.211052843268546	4	1244504	F	II	C4orf42	1stExon	shore	1stExon-shore	chr4:1241412-1244111	NA	NA		rs77095331		High-ICI hypermethylated probes
cg25913647	0.260103267687565	0.528739183313917	4.25019387957313	8.86398304089095e-05	0.0197524367633337	0.444705252884929	0.347157656815051	0.607260924502616	0.260103267687565	5	76248131	F	II	CRHBP	TSS1500	shore	TSS1500-shore	chr5:76249435-76250528	NA	NA			rs75604502	Low-ICI hypermethylated probes
cg09536516	-0.138849231180492	0.721159189380594	-4.25004645460243	8.86831001790136e-05	0.0197524367633337	0.444233266451446	0.818091671525466	0.679242440344974	-0.138849231180492	7	30934475	R	II		IGR	opensea	IGR-opensea		NA	TRUE				High-ICI hypermethylated probes
cg09731079	-0.229177882714853	0.480684177249966	-4.2498265434945	8.87476830397433e-05	0.0197524367633337	0.443529227687346	0.640676284050901	0.411498401336048	-0.229177882714853	16	67263157	R	II	TMEM208	3'UTR	shelf	3'UTR-shelf	chr16:67260744-67261155	NA	NA				High-ICI hypermethylated probes
cg01507342	-0.217442681683628	0.364735456468708	-4.24865648152466	8.90920726217011e-05	0.0197985214548025	0.439783605444989	0.516535064436524	0.299092382752896	-0.217442681683628	17	65387096	R	II	PITPNC1	Body	opensea	Body-opensea		TRUE	TRUE				High-ICI hypermethylated probes
cg08569425	0.22002117674791	0.548534702603856	4.24850176274882	8.91377087830219e-05	0.0197985214548025	0.439288354359901	0.39493501317607	0.61495618992398	0.22002117674791	5	125758506	F	II	GRAMD3	TSS1500	shore	TSS1500-shore	chr5:125759047-125759298	NA	NA				Low-ICI hypermethylated probes
cg11295724	-0.226184245163612	0.50418816074292	-4.24840513331921	8.91662223155812e-05	0.0197985214548025	0.438979050296119	0.662090369630724	0.435906124467112	-0.226184245163612	20	1538353	R	II	SIRPD	TSS200	opensea	TSS200-opensea		NA	NA				High-ICI hypermethylated probes
cg18897335	-0.218789871668858	0.54216143010388	-4.24795936362087	8.92978753753956e-05	0.0198047082004687	0.437552216586198	0.69490152919346	0.476111657524602	-0.218789871668858	11	3187790	F	II	OSBPL5	TSS1500	shore	TSS1500-shore	chr11:3186131-3186768	NA	NA				High-ICI hypermethylated probes
cg18023842	-0.242493522419435	0.671490273975225	-4.2475962243831	8.94052640388442e-05	0.0198047082004687	0.436389922524307	0.840778204720868	0.598284682301434	-0.242493522419435	1	160336475	F	II	NHLH1	TSS1500	opensea	TSS1500-opensea		NA	NA				High-ICI hypermethylated probes
cg02217022	-0.106809988223659	0.658275644642887	-4.24746736323458	8.94434014128383e-05	0.0198047082004687	0.435977490208576	0.732841108119781	0.626031119896122	-0.106809988223659	17	80833526	F	II	TBCD	Body	shelf	Body-shelf	chr17:80829533-80829871	TRUE	TRUE			rs79231448	High-ICI hypermethylated probes
cg14678680	-0.214557296167405	0.375802367456364	-4.24719744496846	8.95233368808789e-05	0.0198047082004687	0.43511361081874	0.525587649686439	0.311030353519035	-0.214557296167405	12	40268790	R	II	SLC2A13	Body	opensea	Body-opensea		NA	TRUE				High-ICI hypermethylated probes
cg25236277	-0.154093138719811	0.23429892978237	-4.24706407545732	8.95628594698946e-05	0.0198047082004687	0.434686768537029	0.341873385115068	0.187780246395257	-0.154093138719811	3	119070599	R	II	CDGAP	Body	opensea	Body-opensea		NA	TRUE				High-ICI hypermethylated probes
cg07720105	-0.122830882244496	0.589378739557879	-4.24670050410069	8.96706859632266e-05	0.0198178506960477	0.433523209952765	0.675128600747433	0.552297718502937	-0.122830882244496	19	14591345	R	I	GIPC1	Body	shore	Body-shore	chr19:14591032-14591308	TRUE	NA				High-ICI hypermethylated probes
cg24211157	-0.161510015492297	0.570734788671082	-4.24642256127387	8.97532021563357e-05	0.0198196149473034	0.432633725811522	0.683487063637402	0.521977048145105	-0.161510015492297	17	36829393	F	II	C17orf96	1stExon	shore	1stExon-shore	chr17:36829692-36831500	NA	TRUE				High-ICI hypermethylated probes
cg04597975	-0.109628778909789	0.309126980105407	-4.24634762602703	8.97754616977868e-05	0.0198196149473034	0.432393919748638	0.3856602785896	0.276031499679811	-0.109628778909789	8	142437565	F	II	PTP4A3	Body	shore	Body-shore	chr8:142437033-142437272	NA	TRUE				High-ICI hypermethylated probes
cg01019262	-0.207205127064954	0.563298033028985	-4.24504873243502	9.01621518174664e-05	0.0198942593670257	0.428237555298382	0.707950668904519	0.500745541839565	-0.207205127064954	1	155095195	F	II		IGR	shelf	IGR-shelf	chr1:155098434-155100451	NA	NA				High-ICI hypermethylated probes
cg15383087	-0.161464893050867	0.656948824354257	-4.24483868020137	9.0224837719491e-05	0.0198973704318321	0.42756546128285	0.769669598748258	0.608204705697391	-0.161464893050867	19	36910144	R	II	ZFP82	TSS1500	shore	TSS1500-shore	chr19:36909281-36909854	NA	NA				High-ICI hypermethylated probes
cg06206626	-0.105007498023663	0.254524265905584	-4.24427648683792	9.03928215174159e-05	0.0199123314227787	0.425766717400416	0.327831387167387	0.222823889143724	-0.105007498023663	22	26825900	R	II	ASPHD2	5'UTR	shore	5'UTR-shore	chr22:26824978-26825680	NA	NA				High-ICI hypermethylated probes
cg02817932	-0.134126551778204	0.347191668050075	-4.24383942216133	9.05236266700916e-05	0.0199123314227787	0.424368403769385	0.440827185329199	0.306700633550995	-0.134126551778204	16	85683584	R	I	KIAA0182	Body	shore	Body-shore	chr16:85684107-85684491	NA	TRUE			rs76095800	High-ICI hypermethylated probes
cg06153623	-0.110797919725126	0.222462151247068	-4.24383807609696	9.05240298054919e-05	0.0199123314227787	0.424364097374433	0.299811642375929	0.189013722650804	-0.110797919725126	12	130529849	R	II		IGR	shelf	IGR-shelf	chr12:130526915-130527117	NA	TRUE				High-ICI hypermethylated probes
cg16127719	-0.119004791889715	0.211920149524592	-4.24342131480352	9.06489303517992e-05	0.0199123314227787	0.423030806046136	0.294998966504205	0.175994174614489	-0.119004791889715	1	167425186	F	II	CD247	Body	island	Body-island	chr1:167424088-167425216	TRUE	NA				High-ICI hypermethylated probes
cg00922857	-0.285463988908189	0.689092065488781	-4.24313504639128	9.0734820043153e-05	0.0199123314227787	0.42211502068532	0.888378246424687	0.602914257516498	-0.285463988908189	1	77484471	F	II	ST6GALNAC5	Body	opensea	Body-opensea		NA	TRUE		rs11162251		High-ICI hypermethylated probes
cg22219876	-0.119928549093895	0.780259773239417	-4.24290233526041	9.08046990888611e-05	0.0199123314227787	0.421370589479617	0.863983477323834	0.744054928229939	-0.119928549093895	7	33761784	F	II		IGR	opensea	IGR-opensea		NA	TRUE				High-ICI hypermethylated probes
cg21101226	-0.183407709244679	0.564809026556024	-4.24289959291018	9.08055228798562e-05	0.0199123314227787	0.421361816956924	0.692848370745706	0.509440661501027	-0.183407709244679	7	150745487	R	II	ACCN3	TSS200	shore	TSS200-shore	chr7:150746002-150746381	NA	NA				High-ICI hypermethylated probes
cg27179680	-0.109413508334099	0.782242455204326	-4.24266455938784	9.08761529894886e-05	0.0199123314227787	0.420609976832401	0.858625470456433	0.749211962122334	-0.109413508334099	1	205460879	R	I		IGR	opensea	IGR-opensea		NA	TRUE				High-ICI hypermethylated probes
cg16293656	-0.229760016268408	0.638934902351642	-4.24181565162968	9.11317037230195e-05	0.0199362086131295	0.417894604838881	0.79933340427487	0.569573388006462	-0.229760016268409	8	21900438	F	II	FGF17	5'UTR	opensea	5'UTR-opensea		NA	NA				High-ICI hypermethylated probes
cg09457527	-0.145540722635385	0.439613137626708	-4.24177981695219	9.11425065492548e-05	0.0199362086131295	0.417779987478138	0.54121703833443	0.395676315699045	-0.145540722635386	15	25487893	R	II	SNORD115-40	TSS1500	opensea	TSS1500-opensea		NA	NA				High-ICI hypermethylated probes
cg06025216	-0.229648413502167	0.420465183225557	-4.24170575765054	9.1164836624549e-05	0.0199362086131295	0.417543109988468	0.580785773783674	0.351137360281506	-0.229648413502167	16	4164891	R	II	ADCY9	Body	island	Body-island	chr16:4164808-4166258	NA	NA				High-ICI hypermethylated probes
cg24997330	-0.190474245732195	0.698670671211593	-4.24165597881691	9.11798487333932e-05	0.0199362086131295	0.41738389431215	0.831643257854823	0.641169012122628	-0.190474245732195	10	3419027	F	II		IGR	opensea	IGR-opensea		NA	NA				High-ICI hypermethylated probes
cg24214471	-0.119745791866779	0.695251169840546	-4.24124056083972	9.13052225688212e-05	0.0199529682912055	0.416055231246263	0.778847288690939	0.65910149682416	-0.119745791866779	20	36154292	R	II	BLCAP	5'UTR	shore	5'UTR-shore	chr20:36156022-36156669	NA	TRUE				High-ICI hypermethylated probes
cg07597386	-0.250188510961522	0.651238838958206	-4.24042125716548	9.15529808296097e-05	0.0199920745989178	0.413434974436402	0.825898742837004	0.575710231875482	-0.250188510961522	1	3028338	R	I	PRDM16	Body	island	Body-island	chr1:3028179-3028557	NA	NA				High-ICI hypermethylated probes
cg10432662	-0.200677710176199	0.785117923846664	-4.23997081557666	9.16894729368208e-05	0.0199920745989178	0.411994498731593	0.925213683780991	0.724535973604792	-0.200677710176199	20	47255608	F	I	PREX1	Body	shelf	Body-shelf	chr20:47252934-47253218	NA	NA				High-ICI hypermethylated probes
cg25295740	-0.295320541996636	0.446175897571375	-4.23987775895588	9.17176954365838e-05	0.0199920745989178	0.411696920439393	0.652343068399216	0.357022526402579	-0.295320541996637	17	53786022	R	II		IGR	opensea	IGR-opensea		NA	TRUE				High-ICI hypermethylated probes
cg06189038	-0.141578443303801	0.569579092977371	-4.2398429259399	9.17282618719364e-05	0.0199920745989178	0.411585531549799	0.668416874151723	0.526838430847921	-0.141578443303801	7	99767134	F	II	GAL3ST4	TSS1500	shore	TSS1500-shore	chr7:99768884-99769559	NA	NA				High-ICI hypermethylated probes
cg09674170	-0.237901393713978	0.46300219485847	-4.23945870291049	9.18448926543268e-05	0.0200013754989559	0.41035689399386	0.629084299904077	0.391182906190099	-0.237901393713978	16	3062382	R	I	CLDN9	TSS200	shore	TSS200-shore	chr16:3063679-3063981	NA	NA			rs78577899	High-ICI hypermethylated probes
cg21366688	-0.123446138492173	0.142460356158592	-4.23938060399815	9.18686171660312e-05	0.0200013754989559	0.410107162161387	0.228639735860675	0.105193597368502	-0.123446138492173	6	134491421	F	I	SGK1	Body	opensea	Body-opensea		NA	NA		rs7755303		High-ICI hypermethylated probes
cg06112560	-0.109626407250282	0.735688623223985	-4.23904117351928	9.19717969046274e-05	0.0200131998401511	0.409021813214182	0.812220266021352	0.702593858771069	-0.109626407250282	16	23691827	F	II	PLK1	Body	shore	Body-shore	chr16:23689891-23690671	NA	TRUE				High-ICI hypermethylated probes
cg04033580	-0.196271048111337	0.661118450500272	-4.23866343847728	9.20867527733001e-05	0.0200253181066705	0.407814032695091	0.798137861445923	0.601866813334586	-0.196271048111337	22	24891666	R	II	C22orf45	TSS1500	shore	TSS1500-shore	chr22:24890412-24891453	NA	NA				High-ICI hypermethylated probes
cg18693822	0.250803170683481	0.54736497254331	4.23830000846936	9.219748694312e-05	0.0200253181066705	0.406652040741892	0.372275966594465	0.623079137277946	0.250803170683481	7	55620604	F	II	VOPP1	Body	opensea	Body-opensea		TRUE	NA				Low-ICI hypermethylated probes
cg14575790	0.165600542899051	0.57713655989	4.23818165585661	9.22335759353945e-05	0.0200253181066705	0.406273643276186	0.46152863371519	0.627129176614242	0.165600542899051	10	3984975	F	II		IGR	opensea	IGR-opensea		TRUE	TRUE				Low-ICI hypermethylated probes
cg15203905	-0.173578609402272	0.292998645521662	-4.23804184335534	9.22762263232607e-05	0.0200253181066705	0.405826640767126	0.414176165293059	0.240597555890787	-0.173578609402272	1	2845514	R	II		IGR	shore	IGR-shore	chr1:2847056-2847288	NA	NA				High-ICI hypermethylated probes
cg02560408	0.168600646213654	0.734026147685905	4.23799206154223	9.22914170981933e-05	0.0200253181066705	0.405667482224013	0.616323809763165	0.78492445597682	0.168600646213654	10	62757486	F	II	RHOBTB1	Body	shelf	Body-shelf	chr10:62761163-62761595	NA	NA				Low-ICI hypermethylated probes
cg05741638	-0.206589013701306	0.48538500609281	-4.23786254652207	9.23309496107805e-05	0.0200253181066705	0.405253411116949	0.629607525091835	0.423018511390529	-0.206589013701306	16	90084774	R	II	DBNDD1	Body	shore	Body-shore	chr16:90085109-90086419	TRUE	NA				High-ICI hypermethylated probes
cg23639055	-0.201129311780942	0.347785553903925	-4.23763750123447	9.23996804283903e-05	0.0200253181066705	0.404533935793787	0.488196582883074	0.287067271102131	-0.201129311780943	14	90165602	F	II		IGR	shelf	IGR-shelf	chr14:90167782-90168352	NA	NA			rs75799299	High-ICI hypermethylated probes
cg23931819	-0.161451429109845	0.299232674363426	-4.23736597729244	9.24826723961979e-05	0.0200285874646882	0.403665891734833	0.411944049402375	0.25049262029253	-0.161451429109845	1	1245076	F	I	PUSL1	Body	island	Body-island	chr1:1242400-1245185	NA	NA				High-ICI hypermethylated probes
cg07959609	-0.14597643914109	0.710050050730504	-4.23513765542347	9.3166505539565e-05	0.020144723520378	0.396543113845437	0.811958130885604	0.665981691744514	-0.14597643914109	1	16466380	R	II	EPHA2	Body	shore	Body-shore	chr1:16464376-16464621	TRUE	TRUE				High-ICI hypermethylated probes
cg10073584	-0.162349694109479	0.634912874407738	-4.23450707259826	9.33609103708168e-05	0.0201761056361578	0.394527800957822	0.748251340106809	0.585901645997329	-0.162349694109479	8	143880111	R	II		IGR	shore	IGR-shore	chr8:143879594-143879806	NA	NA				High-ICI hypermethylated probes
cg15449516	-0.129391347164426	0.697354859741345	-4.23347158510304	9.36809999200995e-05	0.0202213917099437	0.391218748014854	0.787684668139152	0.658293320974726	-0.129391347164426	10	48593014	F	II		IGR	opensea	IGR-opensea		NA	TRUE				High-ICI hypermethylated probes
cg11025972	-0.168494802987862	0.275190978555585	-4.23319856486611	9.37655732677278e-05	0.0202213917099437	0.390346337081482	0.39281942592447	0.224324622936608	-0.168494802987862	13	112690569	F	II		IGR	shore	IGR-shore	chr13:112691292-112691533	NA	NA				High-ICI hypermethylated probes
cg17234201	-0.217482090521548	0.677882665087539	-4.23243980402963	9.4001003882089e-05	0.0202609763767455	0.387921930503579	0.829709784885601	0.612227694364053	-0.217482090521548	4	783597	R	II	CPLX1	Body	shelf	Body-shelf	chr4:786118-786341	NA	NA				High-ICI hypermethylated probes
cg19546012	-0.122915122449655	0.66136368894198	-4.23152857102034	9.4284502916811e-05	0.0202888629536076	0.385010621151566	0.747172359331362	0.624257236881707	-0.122915122449656	19	752860	F	I	C19orf21	5'UTR	opensea	5'UTR-opensea		TRUE	TRUE		rs11882442		High-ICI hypermethylated probes
cg16328400	-0.100545968690637	0.272726958745218	-4.23131967840848	9.43496096340212e-05	0.0202888629536076	0.384343270552252	0.342919427453776	0.242373458763139	-0.100545968690637	14	102499720	R	II	DYNC1H1	Body	opensea	Body-opensea		NA	NA				High-ICI hypermethylated probes
cg04154502	-0.264491133131868	0.633359129254118	-4.23129852317654	9.43562056369006e-05	0.0202888629536076	0.384275686686902	0.818003882572592	0.553512749440724	-0.264491133131868	19	3831293	F	I	ZFR2	Body	shore	Body-shore	chr19:3831363-3831807	NA	NA				High-ICI hypermethylated probes
cg10837116	-0.156519138111741	0.634374315624946	-4.23106951221415	9.44276377802048e-05	0.0202888629536076	0.38354408404302	0.743642393174653	0.587123255062911	-0.156519138111742	12	53069933	R	II	KRT1	Body	opensea	Body-opensea		NA	NA				High-ICI hypermethylated probes
cg01078582	0.293134581958206	0.571041120544247	4.23037821403931	9.46435833449255e-05	0.0203139455518417	0.381335766921468	0.366399997290406	0.659534579248611	0.293134581958206	21	42212601	F	II	DSCAM	Body	shore	Body-shore	chr21:42213510-42213946	NA	NA				Low-ICI hypermethylated probes
cg19090861	-0.151317933136021	0.702920669118364	-4.23015035354413	9.47148667431527e-05	0.0203185963948959	0.380607916522605	0.80855771677936	0.657239783643338	-0.151317933136022	11	66085958	F	II	CD248	TSS1500	shore	TSS1500-shore	chr11:66083955-66084535	TRUE	NA				High-ICI hypermethylated probes
cg09470010	0.255310900510347	0.378765461407943	4.22990863837067	9.47905414077678e-05	0.0203231851851846	0.379835831232906	0.200529549730908	0.455840450241255	0.255310900510347	10	104094152	F	II	GBF1	Body	opensea	Body-opensea		NA	TRUE				Low-ICI hypermethylated probes
cg04025965	-0.231151561785901	0.471820163418799	-4.22950780946607	9.49161598473839e-05	0.0203231851851846	0.378555553028808	0.633190121646693	0.402038559860792	-0.231151561785901	7	150779110	F	I	FASTK	TSS1500	island	TSS1500-island	chr7:150777607-150780879	NA	NA				High-ICI hypermethylated probes
cg06358171	-0.181128452335332	0.436330642519734	-4.22944849734311	9.49347617959743e-05	0.0203231851851846	0.378366110580481	0.562778807357607	0.381650355022275	-0.181128452335332	1	54822008	R	II	SSBP3	Body	island	Body-island	chr1:54821990-54822333	NA	NA				High-ICI hypermethylated probes
cg24147187	-0.214183522604673	0.551469570930373	-4.22888414053063	9.51119371755403e-05	0.020329212799019	0.376563624073468	0.700993916899673	0.486810394295	-0.214183522604673	20	36535798	F	II	VSTM2L	Body	shelf	Body-shelf	chr20:36531143-36532133	TRUE	TRUE				High-ICI hypermethylated probes
cg04584761	-0.186432152719057	0.462567603631838	-4.22868581672711	9.51742755979397e-05	0.020329212799019	0.375930229935848	0.592718351756463	0.406286199037406	-0.186432152719057	2	27874308	R	II	SUPT7L	3'UTR	opensea	3'UTR-opensea		NA	NA				High-ICI hypermethylated probes
cg06834506	-0.244528471718249	0.383713585059779	-4.22862584789803	9.5193133201137e-05	0.020329212799019	0.375738708093064	0.554422140787613	0.309893669069364	-0.244528471718249	2	26396964	R	II	FAM59B	Body	island	Body-island	chr2:26396102-26397204	NA	NA				High-ICI hypermethylated probes
cg21435101	-0.241563139288571	0.657734450858968	-4.22842088851224	9.52576114639505e-05	0.020329212799019	0.375084141354384	0.826372868852876	0.584809729564305	-0.241563139288571	12	133021135	F	I		IGR	shore	IGR-shore	chr12:133022649-133022863	NA	NA		rs7953933		High-ICI hypermethylated probes
cg09676013	-0.234204445951722	0.459605705732447	-4.22818288892587	9.53325370836332e-05	0.020329212799019	0.374324075444505	0.623106922717612	0.38890247676589	-0.234204445951723	6	33080500	R	II	HLA-DPB2	Body	opensea	Body-opensea		NA	NA				High-ICI hypermethylated probes
cg01779740	-0.142498029958879	0.698714611294318	-4.22793531369912	9.54105379868198e-05	0.020329212799019	0.37353345125018	0.798194368058063	0.655696338099184	-0.142498029958879	8	142366708	R	II	GPR20	3'UTR	shore	3'UTR-shore	chr8:142367050-142367860	TRUE	NA				High-ICI hypermethylated probes
cg18953784	0.201574834485668	0.56923244953956	4.22734737663607	9.55960215463586e-05	0.020329212799019	0.371655981860314	0.42851039527598	0.630085229761648	0.201574834485668	11	64739484	R	I		IGR	island	IGR-island	chr11:64739010-64739750	TRUE	NA				Low-ICI hypermethylated probes
cg05613017	0.246820417775523	0.520889795194294	4.22728167962199	9.56167695114374e-05	0.020329212799019	0.371446198366819	0.348581201652891	0.595401619428414	0.246820417775522	12	65589446	F	II	LEMD3	Body	opensea	Body-opensea		NA	TRUE				Low-ICI hypermethylated probes
cg23525500	-0.162517387900038	0.450223071281985	-4.22713947013023	9.56616960851682e-05	0.020329212799019	0.370992100913056	0.563678606231068	0.40116121833103	-0.162517387900038	17	33083886	F	II		IGR	opensea	IGR-opensea		NA	TRUE				High-ICI hypermethylated probes
cg08877512	-0.154488548593029	0.656387981307574	-4.22611208685441	9.59868748207857e-05	0.0203691433877625	0.367711724229464	0.76423847749516	0.609749928902131	-0.154488548593029	16	8862626	R	II	ABAT	Body	opensea	Body-opensea		NA	NA				High-ICI hypermethylated probes
cg23454284	-0.214466203397788	0.486640546524576	-4.22608647169835	9.5994996015837e-05	0.0203691433877625	0.367629941446962	0.63636223568907	0.421896032291281	-0.214466203397788	17	935685	F	II	ABR	Body	shore	Body-shore	chr17:934417-935088	NA	NA		rs4968146	rs60075774	High-ICI hypermethylated probes
cg03663874	-0.115727920232454	0.638394808342989	-4.22592030475798	9.60476948668632e-05	0.0203697712522253	0.367099417856894	0.719185997939231	0.603458077706777	-0.115727920232454	16	332515	R	II	ARHGDIG	Body	island	Body-island	chr16:332514-332760	NA	NA				High-ICI hypermethylated probes
cg05816000	-0.180074926076063	0.381461890341036	-4.2256234424669	9.61419129099374e-05	0.0203791992890036	0.366151646626332	0.507174574582816	0.327099648506753	-0.180074926076063	4	148915072	R	II	ARHGAP10	Body	opensea	Body-opensea		NA	TRUE				High-ICI hypermethylated probes
cg21189909	-0.106564419072328	0.210139458067989	-4.22530359378719	9.62435268168698e-05	0.0203901844610478	0.365130524680338	0.284533486476973	0.177969067404644	-0.106564419072328	1	16399649	R	II	FAM131C	Body	island	Body-island	chr1:16399648-16400072	NA	TRUE				High-ICI hypermethylated probes
cg19464087	-0.134299480649087	0.245014947717921	-4.22499994703975	9.63400899767621e-05	0.0204000887734351	0.364161162504806	0.338771188925775	0.204471708276688	-0.134299480649087	3	9442171	R	II	SETD5	5'UTR	shelf	5'UTR-shelf	chr3:9437945-9439760	NA	NA				High-ICI hypermethylated probes
cg13028471	0.276634225641915	0.429691255287794	4.22451038736427	9.64959737563211e-05	0.0204225375444606	0.362598363202188	0.236569248707589	0.513203474349504	0.276634225641915	4	139163535	R	II	SLC7A11	TSS200	opensea	TSS200-opensea		TRUE	NA				Low-ICI hypermethylated probes
cg21082879	-0.148698880494129	0.179664050338097	-4.22399388078517	9.66607034109136e-05	0.0204362783815477	0.360949638195541	0.283472702758526	0.134773822264398	-0.148698880494129	11	63607728	F	II	MARK2	Body	shore	Body-shore	chr11:63606114-63607474	NA	NA				High-ICI hypermethylated probes
cg09621708	0.213301124487078	0.686546976937287	4.22331376769608	9.68780287594663e-05	0.0204653344479907	0.358778819699435	0.537638644748195	0.750939769235272	0.213301124487078	16	50003457	F	II		IGR	opensea	IGR-opensea		NA	NA		rs74469450		Low-ICI hypermethylated probes
cg01206705	-0.210911922504274	0.620283222667262	-4.2232510896874	9.68980809390707e-05	0.0204653344479907	0.358578769517258	0.767523621396661	0.556611698892387	-0.210911922504274	15	65822356	R	II	PTPLAD1	TSS1500	shore	TSS1500-shore	chr15:65822685-65823540	NA	NA				High-ICI hypermethylated probes
cg23404217	0.146710371072299	0.508953156168773	4.22240205244241	9.7170105481595e-05	0.0205122085656988	0.35586902939097	0.406532708439054	0.553243079511353	0.146710371072299	2	3180877	F	II		IGR	shelf	IGR-shelf	chr2:3184187-3185413	NA	NA				Low-ICI hypermethylated probes
cg12339531	-0.122626890668961	0.544074421732977	-4.22141235395142	9.74881328536488e-05	0.0205581488645846	0.352710698080869	0.629681873709422	0.507054983040461	-0.122626890668961	13	113650822	R	II	MCF2L	Body	shore	Body-shore	chr13:113648343-113649601	NA	NA				High-ICI hypermethylated probes
cg03730249	-0.15240905513879	0.307957037389677	-4.22106045160584	9.76014557300121e-05	0.0205638801565052	0.351587792419842	0.414355811731851	0.261946756593062	-0.15240905513879	1	42692013	R	II	FOXJ3	Body	opensea	Body-opensea		NA	TRUE				High-ICI hypermethylated probes
cg10483828	-0.102708694159199	0.807929305994916	-4.22101612662266	9.76157387424634e-05	0.0205638801565052	0.351446356492307	0.879631601917376	0.776922907758177	-0.102708694159199	1	1177703	F	II		IGR	shore	IGR-shore	chr1:1177885-1178207	NA	NA				High-ICI hypermethylated probes
cg25735572	-0.108823389512216	0.547499503012274	-4.2206614551598	9.77300990341936e-05	0.0205668121978814	0.350314666715994	0.623470548520802	0.514647159008586	-0.108823389512217	11	1159315	F	I		IGR	shelf	IGR-shelf	chr11:1155476-1155861	NA	NA		rs56360743		High-ICI hypermethylated probes
cg10941566	-0.225713537368215	0.586664400953484	-4.21971515083172	9.80358624826637e-05	0.0205952758693295	0.347295415140469	0.744238002512427	0.518524465144212	-0.225713537368215	22	30117148	R	I	CABP7	Body	island	Body-island	chr22:30116081-30117160	NA	NA				High-ICI hypermethylated probes
cg02902415	-0.19597857217521	0.611551480928562	-4.21937274540101	9.81467269144603e-05	0.0206015563743574	0.346203027582068	0.748366710560312	0.552388138385102	-0.19597857217521	1	110088541	F	II		IGR	shelf	IGR-shelf	chr1:110091039-110091590	NA	NA				High-ICI hypermethylated probes
cg17627559	-0.164351596850685	0.481319946231113	-4.21908570639557	9.82397585366276e-05	0.0206046837911197	0.345287310743864	0.596055966674044	0.431704369823359	-0.164351596850685	11	2323896	F	II	TSPAN32	Body	opensea	Body-opensea		TRUE	NA				High-ICI hypermethylated probes
cg05493001	-0.191499032566736	0.43127374913982	-4.21894981921451	9.82838305104945e-05	0.0206046837911197	0.344853811700506	0.564961753007165	0.373462720440428	-0.191499032566736	19	52195559	R	II	MIR125A	TSS1500	opensea	TSS1500-opensea		NA	NA				High-ICI hypermethylated probes
cg17613710	-0.190150771689552	0.718758997787909	-4.21873372708355	9.83539547127331e-05	0.0206046837911197	0.344164461734151	0.851505762929672	0.66135499124012	-0.190150771689552	7	791736	R	II	HEATR2	Body	shore	Body-shore	chr7:791984-792238	NA	NA				High-ICI hypermethylated probes
cg23655039	-0.123585696782733	0.205585847997132	-4.21870623385779	9.8362880040923e-05	0.0206046837911197	0.344076757536176	0.291862655185078	0.168276958402345	-0.123585696782733	3	182972742	F	II	MCF2L2	Body	shore	Body-shore	chr3:182971429-182972635	NA	NA				High-ICI hypermethylated probes
cg05824809	-0.237158395058745	0.450185265513647	-4.21784752798658	9.86420442831808e-05	0.0206525980711216	0.341337601118565	0.615748673384846	0.378590278326102	-0.237158395058745	16	85427847	F	II		IGR	opensea	IGR-opensea		TRUE	NA		rs73259316		High-ICI hypermethylated probes
cg18452449	-0.192502465121389	0.654685612469299	-4.21743104095169	9.87777206254268e-05	0.020670436799616	0.340009161512299	0.789074125855928	0.59657166073454	-0.192502465121388	3	52260671	F	II	TLR9	TSS1500	opensea	TSS1500-opensea		NA	NA				High-ICI hypermethylated probes
cg18053948	-0.111818874203541	0.865974546765532	-4.21615133316442	9.91957376455211e-05	0.0207233067191377	0.335927768098066	0.944036779700079	0.832217905496538	-0.111818874203541	12	132936807	F	I		IGR	shore	IGR-shore	chr12:132938326-132939235	NA	NA		rs75185746		High-ICI hypermethylated probes
cg02726819	-0.153089901551715	0.304956392341692	-4.2161430833748	9.91984380066256e-05	0.0207233067191377	0.335901458870429	0.411830474557041	0.258740573005326	-0.153089901551715	7	158800869	F	II	LOC154822	TSS200	shore	TSS200-shore	chr7:158798591-158799434	NA	NA				High-ICI hypermethylated probes
cg09861583	-0.190757324537346	0.771262096938067	-4.21603817766874	9.92327824759087e-05	0.0207233067191377	0.335566908521422	0.90443230463395	0.713674980096605	-0.190757324537346	2	238769419	R	I	RAMP1	Body	shore	Body-shore	chr2:238768073-238768831	NA	NA				High-ICI hypermethylated probes
cg05370136	-0.10792340082377	0.207420212940581	-4.21503416085458	9.95620662644483e-05	0.0207728936729049	0.33236524687123	0.282762964459063	0.174839563635292	-0.10792340082377	19	36910116	F	II	ZFP82	TSS1500	shore	TSS1500-shore	chr19:36909281-36909854	TRUE	NA				High-ICI hypermethylated probes
cg00185660	-0.201246561568641	0.698655122847696	-4.21500490762271	9.9571676230355e-05	0.0207728936729049	0.332271968216892	0.839148005452219	0.637901443883578	-0.201246561568641	10	131667994	R	II	EBF3	Body	shore	Body-shore	chr10:131666016-131666315	NA	NA				High-ICI hypermethylated probes
cg12605157	-0.132862032774503	0.497677096905191	-4.21451593700407	9.97324411523128e-05	0.0207911125947769	0.330712853308914	0.590429836766637	0.457567803992134	-0.132862032774503	9	139262133	F	II	CARD9	Body	island	Body-island	chr9:139262001-139262396	NA	NA				High-ICI hypermethylated probes
cg12371569	0.171432548410307	0.454958652649234	4.21426979529575	9.98134635439734e-05	0.0207911125947769	0.329928047798105	0.335279326400529	0.506711874810836	0.171432548410307	12	13278271	R	II		IGR	opensea	IGR-opensea		TRUE	TRUE				Low-ICI hypermethylated probes
cg15188688	-0.206408371321474	0.441663401170017	-4.2140745360497	9.98777824255415e-05	0.0207911125947769	0.329305493386564	0.585759811337838	0.379351440016364	-0.206408371321474	22	19468342	R	II	CDC45L	Body	shore	Body-shore	chr22:19466308-19467811	NA	NA				High-ICI hypermethylated probes
cg22912485	0.222823274191203	0.414421336022814	4.21401710248054	9.98967088441433e-05	0.0207911125947769	0.329122377871629	0.258865465361031	0.481688739552234	0.222823274191203	8	57896881	R	II	IMPAD1	Body	opensea	Body-opensea		NA	TRUE				Low-ICI hypermethylated probes
cg11707310	-0.271358279295637	0.58567300255456	-4.21370288833079	0.000100000315317986	0.0207911125947769	0.328120590149483	0.775111801308118	0.503753522012481	-0.271358279295637	1	2537719	R	I	MMEL1	Body	island	Body-island	chr1:2537671-2537886	NA	NA				High-ICI hypermethylated probes
cg12756504	-0.29156161733007	0.370400453902632	-4.2135766016408	0.000100041985472111	0.0207911125947769	0.327717969134515	0.573943469774568	0.282381852444498	-0.291561617330071	15	37396672	R	II		IGR	shelf	IGR-shelf	chr15:37392601-37392829	NA	NA				High-ICI hypermethylated probes
cg00757070	-0.119220819166235	0.434164979484683	-4.21290954190913	0.000100262371528038	0.0208215253358982	0.325591380078817	0.517394607959224	0.398173788792989	-0.119220819166235	11	118827082	F	II	UPK2	1stExon	opensea	1stExon-opensea		NA	TRUE				High-ICI hypermethylated probes
cg16236851	-0.189825207174047	0.397582999295856	-4.21213945555379	0.000100517382188719	0.0208391916209782	0.323136546694204	0.530102483549436	0.340277276375389	-0.189825207174047	12	130529951	F	II		IGR	shelf	IGR-shelf	chr12:130526915-130527117	NA	TRUE				High-ICI hypermethylated probes
cg03736099	-0.185629289941907	0.604392553500611	-4.2118564918517	0.000100611242471301	0.0208391916209782	0.32223458780212	0.73398281251666	0.548353522574752	-0.185629289941907	17	78430511	F	II		IGR	shore	IGR-shore	chr17:78428262-78429288	NA	NA				High-ICI hypermethylated probes
cg15984596	-0.213268410723295	0.65448939236163	-4.21182446729676	0.000100621870513199	0.0208391916209782	0.32213251003369	0.803374886640156	0.590106475916861	-0.213268410723295	14	104979786	F	II		IGR	opensea	IGR-opensea		NA	NA				High-ICI hypermethylated probes
cg18021286	-0.100893487082745	0.224370697376159	-4.21141621838124	0.000100757452308516	0.0208391916209782	0.320831256300505	0.294805773264113	0.193912286181368	-0.100893487082745	11	115530371	F	II		IGR	island	IGR-island	chr11:115529997-115530548	TRUE	TRUE				High-ICI hypermethylated probes
cg21503330	-0.125592104580835	0.690922919310915	-4.21113088189966	0.000100852319471821	0.0208391916209782	0.319921810677812	0.778600426282441	0.653008321701607	-0.125592104580834	11	18287818	R	II	SAA1	1stExon	opensea	1stExon-opensea		NA	NA			rs2445166	High-ICI hypermethylated probes
cg13922421	-0.137796150135592	0.261845323034751	-4.21098388503933	0.000100901226049779	0.0208391916209782	0.319453303147753	0.35804263539356	0.220246485257968	-0.137796150135592	9	138029591	F	II		IGR	opensea	IGR-opensea		NA	TRUE				High-ICI hypermethylated probes
cg09795091	-0.216974001568468	0.623731794794407	-4.21096597078539	0.000100907187783925	0.0208391916209782	0.319396207490365	0.775204210983714	0.558230209415247	-0.216974001568468	11	62627291	F	I	SLC3A2	Body	shelf	Body-shelf	chr11:62623359-62623877	NA	NA				High-ICI hypermethylated probes
cg13962866	-0.123730836876384	0.311239871056812	-4.20855747929631	0.000101711837810905	0.0209736365011826	0.311721034860106	0.39761800246108	0.273887165584696	-0.123730836876384	13	19622781	F	I	DKFZp686A1627	Body	opensea	Body-opensea		NA	NA		rs56242413		High-ICI hypermethylated probes
cg13808842	-0.167954399628453	0.69382897844786	-4.20768570171259	0.000102004621576084	0.0210128494243297	0.308943459929946	0.811080163094139	0.643125763465685	-0.167954399628453	1	155066096	F	II		IGR	opensea	IGR-opensea		NA	TRUE				High-ICI hypermethylated probes
cg16729555	-0.201103519067648	0.31086690957534	-4.20692783829583	0.000102259812301833	0.0210548274975971	0.306529056794095	0.451259932320679	0.250156413253031	-0.201103519067648	1	207143533	R	II	FCAMR	5'UTR	opensea	5'UTR-opensea		NA	NA				High-ICI hypermethylated probes
cg13552742	-0.192762688372207	0.431256613996516	-4.20620200020048	0.000102504800321313	0.0210843991513908	0.304216880022882	0.565826792671453	0.373064104299246	-0.192762688372207	14	77229061	R	II	VASH1	1stExon	shore	1stExon-shore	chr14:77227569-77228691	NA	NA	high-CpG:76297536-76298843			High-ICI hypermethylated probes
cg15329642	-0.124070211588077	0.26141140414796	-4.20619724646132	0.000102506406700476	0.0210843991513908	0.304201737504143	0.348026457520769	0.223956245932692	-0.124070211588077	1	45308298	R	II	PTCH2	Body	shore	Body-shore	chr1:45308543-45309159	NA	NA				High-ICI hypermethylated probes
cg27299033	-0.19459990074332	0.50786238112848	-4.20509086286486	0.000102880940308803	0.0211402006828413	0.300677701419512	0.64371514202476	0.44911524128144	-0.19459990074332	17	1883179	R	I	RTN4RL1	Body	shelf	Body-shelf	chr17:1880789-1881116	NA	NA				High-ICI hypermethylated probes
cg07224067	-0.117414641288824	0.331775680637464	-4.20463340574048	0.000103036186843832	0.0211469253741193	0.299220748969159	0.413744392480605	0.296329751191781	-0.117414641288824	17	48555565	R	II	RSAD1	TSS1500	shore	TSS1500-shore	chr17:48556004-48556509	NA	NA				High-ICI hypermethylated probes
cg23378565	-0.132371942736633	0.773789178314782	-4.20397986176868	0.000103258373662647	0.0211587548904346	0.297139415707677	0.866199779847904	0.73382783711127	-0.132371942736634	7	2036160	F	II	MAD1L1	Body	opensea	Body-opensea		TRUE	NA		rs77241388		High-ICI hypermethylated probes
cg12785694	-0.246816475269138	0.41317347756299	-4.20391269466124	0.000103281234954505	0.0211587548904346	0.296925518468985	0.585479318788614	0.338662843519477	-0.246816475269137	3	160122168	F	II	SMC4	Body	shelf	Body-shelf	chr3:160117012-160118878	NA	NA				High-ICI hypermethylated probes
cg04546186	-0.184549036643326	0.620088968052815	-4.20283359267578	0.000103649197112533	0.021191954163583	0.293489290713916	0.748925087973627	0.564376051330301	-0.184549036643326	16	86555150	R	II		IGR	opensea	IGR-opensea		NA	NA				High-ICI hypermethylated probes
cg18563987	-0.140832673636244	0.686785880624033	-4.20275750336911	0.000103675190720595	0.021191954163583	0.293247012836705	0.785103030143675	0.644270356507431	-0.140832673636244	17	73696509	R	II	SAP30BP	Body	opensea	Body-opensea		TRUE	TRUE				High-ICI hypermethylated probes
cg04767507	-0.211950232218418	0.580768233123385	-4.20271828824317	0.000103688589852076	0.021191954163583	0.293122147808329	0.728733489577752	0.516783257359335	-0.211950232218418	10	80989841	F	II	ZMIZ1	Body	opensea	Body-opensea		NA	TRUE		rs72818221	rs75519194	High-ICI hypermethylated probes
cg18634538	-0.170663356983716	0.458278736799199	-4.20249986988454	0.000103763250395119	0.021191954163583	0.292426691573473	0.577421080353869	0.406757723370152	-0.170663356983716	14	77065980	R	II		IGR	opensea	IGR-opensea		NA	TRUE				High-ICI hypermethylated probes
cg04090867	-0.134768658585427	0.393315021679505	-4.20235417399666	0.000103813081695283	0.021191954163583	0.291962797615391	0.487398802201407	0.35263014361598	-0.134768658585427	1	10794229	R	II	CASZ1	5'UTR	opensea	5'UTR-opensea		TRUE	NA				High-ICI hypermethylated probes
cg16375820	0.177822267501342	0.354460806691239	4.20222503626052	0.000103857269150948	0.021191954163583	0.291551631220283	0.230320733152566	0.408143000653908	0.177822267501342	5	55289001	F	II	IL6ST	5'UTR	shore	5'UTR-shore	chr5:55290335-55291389	NA	NA			rs75581552	Low-ICI hypermethylated probes
cg06850996	-0.192614415123536	0.561836559514755	-4.20162763137148	0.000104061922714713	0.0212231389251322	0.289649612594118	0.696303226676469	0.503688811552933	-0.192614415123536	12	48152355	F	I	RAPGEF3	1stExon	shore	1stExon-shore	chr12:48152554-48153146	NA	TRUE				High-ICI hypermethylated probes
cg17778211	-0.140993313604619	0.570539877242196	-4.20055298282214	0.000104431051959435	0.0212535070258093	0.286228479477797	0.668969171645421	0.527975858040802	-0.140993313604619	10	126281832	R	II	LHPP	Body	shore	Body-shore	chr10:126281388-126281614	NA	NA				High-ICI hypermethylated probes
cg20149431	-0.13842007392693	0.417136023643069	-4.20037607831278	0.000104491938301765	0.0212535070258093	0.285665346951622	0.513768905441115	0.375348831514185	-0.13842007392693	10	3168685	F	II	PFKP	Body	opensea	Body-opensea		NA	TRUE		rs9423693		High-ICI hypermethylated probes
cg26129606	-0.175499031119314	0.35262968793529	-4.20033419459915	0.000104506358727976	0.0212535070258093	0.285532022032431	0.475147879471415	0.299648848352101	-0.175499031119314	3	131423855	R	II	CPNE4	Body	opensea	Body-opensea		NA	TRUE				High-ICI hypermethylated probes
cg08116915	-0.207955512173857	0.696953520882284	-4.19998804199626	0.000104625611918396	0.0212535070258093	0.284430168459925	0.84213001051309	0.634174498339233	-0.207955512173857	4	8597048	R	II	CPZ	5'UTR	shelf	5'UTR-shelf	chr4:8594412-8594777	NA	NA				High-ICI hypermethylated probes
cg05641348	-0.158806500429032	0.510196987005565	-4.1999366195916	0.000104643338739114	0.0212535070258093	0.284266487352189	0.621061902399418	0.462255401970386	-0.158806500429032	19	2455563	F	II	LMNB2	Body	shore	Body-shore	chr19:2455863-2457078	NA	NA				High-ICI hypermethylated probes
cg20377232	-0.223348560524635	0.311344611682665	-4.19987330749969	0.00010466516829036	0.0212535070258093	0.28406496189278	0.467267191671561	0.243918631146926	-0.223348560524635	6	1180445	R	II		IGR	opensea	IGR-opensea		NA	NA				High-ICI hypermethylated probes
cg26363039	-0.183255333855662	0.41867566929697	-4.19971840104663	0.000104718597554264	0.0212535070258093	0.283571893439379	0.546608638215074	0.363353304359412	-0.183255333855662	12	1609549	R	II	LOC100292680	TSS200	opensea	TSS200-opensea		TRUE	NA				High-ICI hypermethylated probes
cg03368758	0.24435849629203	0.400756294917979	4.19897460034816	0.000104975513113871	0.0212535070258093	0.281204494594443	0.230166401280147	0.474524897572177	0.24435849629203	4	16900733	R	II	LDB2	TSS1500	opensea	TSS1500-opensea		NA	NA				Low-ICI hypermethylated probes
cg19869443	0.139489979626493	0.295736991240355	4.19884696910056	0.000105019659567671	0.0212535070258093	0.280798285450684	0.198357194142614	0.337847173769107	0.139489979626493	1	84766821	F	II	SAMD13	TSS1500	shore	TSS1500-shore	chr1:84764108-84764906	NA	NA				Low-ICI hypermethylated probes
cg05191313	0.136248892055817	0.320973835047397	4.19859299748673	0.000105107559583295	0.0212535070258093	0.279989993694764	0.225856683989563	0.36210557604538	0.136248892055817	5	118747345	F	II		IGR	opensea	IGR-opensea		NA	TRUE				Low-ICI hypermethylated probes
cg14652773	-0.261598344811047	0.519335373231127	-4.19826536468007	0.000105221059351427	0.0212535070258093	0.27894730287069	0.701960632816197	0.44036228800515	-0.261598344811047	5	177753286	R	II	COL23A1	Body	opensea	Body-opensea		NA	NA				High-ICI hypermethylated probes
cg25046953	-0.189623216450494	0.358388541976196	-4.19812854387447	0.000105268492524939	0.0212535070258093	0.278511882752754	0.490767013837862	0.301143797387368	-0.189623216450494	15	73611614	R	I		IGR	shore	IGR-shore	chr15:73611173-73611529	NA	TRUE			rs12591304	High-ICI hypermethylated probes
cg09161446	-0.27073141359017	0.638997784225775	-4.19799889685725	0.000105313457832488	0.0212535070258093	0.278099299026193	0.827998959750988	0.557267546160818	-0.27073141359017	2	240697468	R	I		IGR	opensea	IGR-opensea		NA	NA			rs35027276	High-ICI hypermethylated probes
cg25377206	0.28637765201209	0.760285364182686	4.19790049724287	0.000105347598087228	0.0212535070258093	0.277786160029498	0.560361342966699	0.846738994978789	0.28637765201209	7	35294658	R	II	TBX20	TSS1500	island	TSS1500-island	chr7:35292985-35294674	TRUE	TRUE				Low-ICI hypermethylated probes
cg03062587	-0.188477002601544	0.698359419734299	-4.19786850208121	0.000105358701288047	0.0212535070258093	0.277684341985805	0.829937704569339	0.641460701967795	-0.188477002601544	17	1077099	R	I	ABR	Body	opensea	Body-opensea		NA	NA				High-ICI hypermethylated probes
cg17894779	0.209788680300956	0.519848092609373	4.19752038043243	0.00010547958250729	0.0212535070258093	0.276576540883211	0.373391844097385	0.583180524398341	0.209788680300956	3	60066405	R	II	FHIT	Body	opensea	Body-opensea		NA	TRUE				Low-ICI hypermethylated probes
cg04271999	-0.24849132460372	0.632363758434521	-4.19750746378623	0.00010548407025242	0.0212535070258093	0.276535438090404	0.805838834101269	0.557347509497549	-0.24849132460372	17	76212052	R	II	BIRC5	Body	shore	Body-shore	chr17:76210129-76210627	NA	NA				High-ICI hypermethylated probes
cg14890224	-0.145093937214054	0.547330150283396	-4.1974821986474	0.000105492848879814	0.0212535070258093	0.276455040638485	0.648622144187547	0.503528206973493	-0.145093937214054	11	2156694	F	II	MIR483	TSS1500	shelf	TSS1500-shelf	chr11:2158951-2162484	NA	NA	low-CpG:2113215-2113303			High-ICI hypermethylated probes
cg16343129	-0.145077707846916	0.257224015113589	-4.19740547140996	0.000105519512879426	0.0212535070258093	0.276210884549191	0.358504679082191	0.213426971235275	-0.145077707846916	12	132930142	F	II		IGR	island	IGR-island	chr12:132930013-132930247	NA	NA				High-ICI hypermethylated probes
cg12936238	-0.16330518929703	0.500732275629029	-4.19728818476941	0.000105560284593222	0.0212535070258093	0.275837667388732	0.614737785138276	0.451432595841247	-0.16330518929703	1	2254582	R	II	MORN1	Body	island	Body-island	chr1:2253723-2254758	NA	TRUE				High-ICI hypermethylated probes
cg02893344	-0.247032509283451	0.533073416864762	-4.19678604553421	0.000105735013443686	0.0212535070258093	0.274239870993332	0.705530074289058	0.458497565005607	-0.247032509283451	16	85517269	R	I		IGR	shore	IGR-shore	chr16:85519109-85519357	NA	NA				High-ICI hypermethylated probes
cg19388972	-0.23331481808392	0.708221075186654	-4.19677865827864	0.000105737586073155	0.0212535070258093	0.274216365605293	0.871101231207504	0.637786413123584	-0.23331481808392	11	58810187	R	II		IGR	opensea	IGR-opensea		NA	NA				High-ICI hypermethylated probes
cg23947828	-0.106244913849637	0.241964714793687	-4.19669202999872	0.000105767759113217	0.0212535070258093	0.273940726014478	0.31613569238683	0.209890778537193	-0.106244913849637	14	101992137	R	II		IGR	shore	IGR-shore	chr14:101992722-101992932	NA	NA				High-ICI hypermethylated probes
cg15214801	-0.187980320642641	0.408704615869702	-4.19623914371193	0.000105925637647053	0.0212747928803565	0.272499748084026	0.539936160469281	0.35195583982664	-0.187980320642641	10	744747	R	II		IGR	shore	IGR-shore	chr10:743240-743479	NA	NA				High-ICI hypermethylated probes
cg23258400	-0.214645315558582	0.547283765748097	-4.19558704943705	0.000106153362965659	0.0212910297193601	0.270425071598459	0.697130495477674	0.482485179919091	-0.214645315558583	14	72113798	R	II	SIPA1L1	Body	opensea	Body-opensea		NA	TRUE				High-ICI hypermethylated probes
cg13311292	-0.153324377320579	0.711873015232381	-4.19556106244999	0.00010616244801779	0.0212910297193601	0.270342395753562	0.818910788078824	0.665586410758244	-0.153324377320579	17	78654663	F	II	RPTOR	Body	opensea	Body-opensea		NA	NA				High-ICI hypermethylated probes
cg21738215	0.103106190454656	0.785049122227215	4.1946945353235	0.000106465818436883	0.0213278337286792	0.267585742663261	0.713069328890946	0.816175519345602	0.103106190454656	3	72052259	R	II		IGR	opensea	IGR-opensea		NA	TRUE				Low-ICI hypermethylated probes
cg00175403	-0.123057900702935	0.396718484668293	-4.19444231266173	0.000106554279359254	0.0213278337286792	0.26678340805944	0.48262683044204	0.359568929739105	-0.123057900702935	1	12223543	F	II		IGR	shelf	IGR-shelf	chr1:12226876-12227712	NA	NA				High-ICI hypermethylated probes
cg05787209	-0.21277146623123	0.456223284908623	-4.19413381739164	0.000106662573508317	0.0213382408661139	0.265802099418963	0.604761855673821	0.391990389442591	-0.21277146623123	16	31022521	R	I	STX1B	TSS1500	opensea	TSS1500-opensea		TRUE	NA				High-ICI hypermethylated probes
cg21684021	-0.190285613518531	0.472815723022092	-4.19390822277512	0.000106741833830836	0.0213382408661139	0.265084516295143	0.605656623025595	0.415371009507063	-0.190285613518532	1	109800400	R	II	CELSR2	Body	shore	Body-shore	chr1:109801054-109801700	TRUE	NA				High-ICI hypermethylated probes
cg02364826	-0.109758446627217	0.174416476141111	-4.1934349973612	0.000106908282419814	0.0213465242643866	0.263579318029741	0.251040297371432	0.141281850744216	-0.109758446627217	5	114878738	R	II	FEM1C	Body	shore	Body-shore	chr5:114880113-114880772	NA	TRUE				High-ICI hypermethylated probes
cg27626387	-0.1286210233566	0.645348760425219	-4.193129234802	0.000107015962871796	0.021352704210614	0.262606817002806	0.735140795598694	0.606519772242094	-0.1286210233566	16	31083776	F	II	ZNF668	5'UTR	shore	5'UTR-shore	chr16:31084343-31086048	NA	NA				High-ICI hypermethylated probes
cg08299089	-0.18563352666053	0.396691713906333	-4.19305105290715	0.000107043513096581	0.021352704210614	0.26235815916495	0.526284930631609	0.340651403971079	-0.185633526660531	14	75079986	F	II	LTBP2	TSS1500	shore	TSS1500-shore	chr14:75077317-75079596	NA	NA				High-ICI hypermethylated probes
cg12423935	0.12724116214273	0.816453989811385	4.19198234694284	0.000107420801223172	0.0214006874076453	0.258959364688093	0.727625253975895	0.854866416118624	0.12724116214273	7	39126804	F	II	POU6F2	Body	opensea	Body-opensea		NA	TRUE				Low-ICI hypermethylated probes
cg15630458	-0.278491112712397	0.544500729836893	-4.19157458068167	0.000107565095918448	0.0214046178188038	0.257662662511716	0.738919053805925	0.460427941093528	-0.278491112712397	8	142986649	R	II		IGR	shore	IGR-shore	chr8:142984423-142984653	TRUE	TRUE				High-ICI hypermethylated probes
cg25937230	-0.165758484672007	0.321654081544662	-4.19134347133816	0.000107646961202045	0.0214101311608577	0.256927759330465	0.437372268957196	0.271613784285189	-0.165758484672007	15	29560915	R	II	NDNL2	1stExon	shore	1stExon-shore	chr15:29561494-29562143	NA	NA				High-ICI hypermethylated probes
cg00419321	0.179123365218885	0.731562090583914	4.19104753683555	0.000107751877628827	0.0214105751760423	0.255986748214522	0.606513703544315	0.7856370687632	0.179123365218885	1	75593476	F	II	LHX8	TSS1500	shelf	TSS1500-shelf	chr1:75595813-75596162	NA	NA				Low-ICI hypermethylated probes
cg23217153	-0.226963981428481	0.60667570507298	-4.19043877159307	0.000107968012758919	0.0214197646261673	0.254051102501876	0.765122258145693	0.538158276717212	-0.226963981428481	2	242808611	R	I		IGR	island	IGR-island	chr2:242808405-242808618	NA	NA				High-ICI hypermethylated probes
cg22321267	-0.198537758439542	0.303885138622752	-4.19027256219899	0.000108027096580498	0.0214197646261673	0.253522642928433	0.442486969986206	0.243949211546663	-0.198537758439543	7	5647332	R	II		IGR	island	IGR-island	chr7:5647104-5647340	NA	TRUE				High-ICI hypermethylated probes
cg08051310	0.235757982371023	0.783647372814796	4.18981724892854	0.000108189111292039	0.0214256666404136	0.252075036129127	0.619061611536913	0.854819593907935	0.235757982371023	6	12958080	R	I	PHACTR1	Body	opensea	Body-opensea		NA	NA	low-CpG:13065524-13066228			Low-ICI hypermethylated probes
cg25487804	-0.154522734532948	0.794802973826661	-4.18932142524812	0.000108365809079314	0.0214387947338508	0.250498720301014	0.902677335670417	0.748154601137469	-0.154522734532948	11	3187511	R	I	OSBPL5	TSS1500	shore	TSS1500-shore	chr11:3186131-3186768	NA	NA			rs77054018	High-ICI hypermethylated probes
cg08664568	-0.254394573313081	0.555483753596085	-4.18898301748059	0.000108486568974412	0.0214387947338508	0.249422911864498	0.733079965154274	0.478685391841193	-0.254394573313081	1	39598712	F	II	MACF1	Body	opensea	Body-opensea		NA	TRUE				High-ICI hypermethylated probes
cg22315844	-0.134966410950419	0.208411209221394	-4.1889523016602	0.000108497536294023	0.0214387947338508	0.249325267475039	0.30263304328112	0.167666632330701	-0.134966410950419	6	69342841	F	II		IGR	shelf	IGR-shelf	chr6:69345216-69345483	NA	NA			rs79750546	High-ICI hypermethylated probes
cg23935261	0.130954800353226	0.444110907395324	4.18857965353166	0.000108630678910177	0.0214387947338508	0.248140661841795	0.352689631677034	0.48364443203026	0.130954800353226	1	165811207	F	II	UCK2	Body	opensea	Body-opensea		NA	TRUE				Low-ICI hypermethylated probes
cg09552548	-0.178298922373198	0.355261579293179	-4.18844409762208	0.000108679150694887	0.0214387947338508	0.247709758072236	0.479734411893336	0.301435489520138	-0.178298922373198	2	232538286	F	II		IGR	opensea	IGR-opensea		TRUE	TRUE				High-ICI hypermethylated probes
cg24825210	-0.1434525731217	0.490907361505178	-4.18743015216915	0.000109042381318088	0.0214794084904625	0.244486856878325	0.591053497458063	0.447600924336363	-0.1434525731217	11	60552755	F	II	MS4A10	TSS200	opensea	TSS200-opensea		NA	NA				High-ICI hypermethylated probes
cg09012538	-0.187928635866552	0.632687175204901	-4.18701283184197	0.000109192221984622	0.0214985836059973	0.24316048510194	0.763882637979664	0.575954002113112	-0.187928635866552	3	52185079	R	II	WDR51A	Body	shelf	Body-shelf	chr3:52188271-52189037	NA	NA				High-ICI hypermethylated probes
cg10520349	0.287981108644501	0.573197101785716	4.1858863237763	0.000109597697896245	0.0215680474909456	0.239580423757937	0.372153686316913	0.660134794961414	0.287981108644501	10	3871234	R	II		IGR	opensea	IGR-opensea		NA	TRUE				Low-ICI hypermethylated probes
cg17056553	-0.216934230181281	0.723598822838514	-4.18510823852467	0.000109878615024017	0.0215982374426731	0.237107933973566	0.875043474097144	0.658109243915863	-0.216934230181281	2	242843030	R	II		IGR	shore	IGR-shore	chr2:242843760-242844198	TRUE	NA				High-ICI hypermethylated probes
cg07716131	-0.164442505912603	0.246807981848446	-4.18486147379532	0.00010996785192134	0.0215982374426731	0.236323847222746	0.361607467108188	0.197164961195585	-0.164442505912603	16	88937225	R	II		IGR	island	IGR-island	chr16:88937055-88937387	NA	NA				High-ICI hypermethylated probes
cg18783781	-0.217533621435582	0.356372322853896	-4.18478076034142	0.000109997055380827	0.0215982374426731	0.23606738785976	0.508235417063642	0.29070179562806	-0.217533621435582	1	9599067	F	II	SLC25A33	TSS1500	shore	TSS1500-shore	chr1:9599350-9600444	NA	NA				High-ICI hypermethylated probes
cg05350224	-0.134916956680045	0.34217921480737	-4.18473171169435	0.00011001480566659	0.0215982374426731	0.235911541619433	0.436366524187779	0.301449567507734	-0.134916956680045	19	3053510	F	II	AES	3'UTR	opensea	3'UTR-opensea		NA	NA				High-ICI hypermethylated probes
cg06087826	-0.140929178348128	0.724869458756923	-4.18414089035183	0.000110228837358456	0.021625060387115	0.234034348085666	0.823253979490522	0.682324801142394	-0.140929178348128	6	170582184	F	II		IGR	shore	IGR-shore	chr6:170584091-170584307	NA	NA				High-ICI hypermethylated probes
cg21005218	-0.203436010613146	0.460374976529031	-4.18406311144042	0.000110257043724443	0.021625060387115	0.233787233959636	0.602396342428774	0.398960331815629	-0.203436010613146	4	7289723	R	II	SORCS2	Body	opensea	Body-opensea		NA	NA				High-ICI hypermethylated probes
cg22416596	-0.164904415354247	0.536573989194385	-4.18308803816928	0.000110611246877671	0.0216737337494626	0.230689487079376	0.651695939536029	0.486791524181782	-0.164904415354247	22	50710746	R	I		IGR	shore	IGR-shore	chr22:50708190-50710490	NA	NA				High-ICI hypermethylated probes
cg18286323	-0.182423914386765	0.772584596964027	-4.18291568416237	0.000110673970570244	0.0216737337494626	0.230141966320556	0.899937140969882	0.717513226583116	-0.182423914386765	11	1670305	F	I	HCCA2	Body	shelf	Body-shelf	chr11:1673834-1674224	NA	NA				High-ICI hypermethylated probes
cg25666516	-0.199461970806419	0.615584051180276	-4.18279499871543	0.000110717911396198	0.0216737337494626	0.229758588856768	0.754831087403626	0.555369116597207	-0.199461970806419	8	142677112	R	II		IGR	opensea	IGR-opensea		TRUE	TRUE				High-ICI hypermethylated probes
cg19952015	-0.207704972879227	0.698194026874632	-4.18249232853677	0.000110828186213718	0.0216747964600568	0.228797130602556	0.843195611714847	0.63549063883562	-0.207704972879227	7	105432653	R	II	ATXN7L1	Body	opensea	Body-opensea		NA	TRUE				High-ICI hypermethylated probes
cg14069412	0.157240688818249	0.381995501525116	4.18217180799966	0.000110945080811263	0.0216873007944216	0.227779006670186	0.272223699897282	0.429464388715531	0.157240688818248	5	134209415	F	II	TXNDC15	TSS200	shore	TSS200-shore	chr5:134209887-134210504	NA	NA				Low-ICI hypermethylated probes
cg05898524	-0.11732358039641	0.296244256085541	-4.18106503436075	0.000111349644235509	0.0217411870552415	0.224263670198945	0.378149397116997	0.260825816720587	-0.11732358039641	1	156083276	R	II	LMNA	TSS1500	shore	TSS1500-shore	chr1:156084486-156085097	NA	NA				High-ICI hypermethylated probes
cg05590755	-0.173930452887711	0.501242537163241	-4.18080184495167	0.000111446059376449	0.0217411870552415	0.223427795321517	0.622665683518813	0.448735230631102	-0.173930452887711	1	23855149	F	II	E2F2	Body	shore	Body-shore	chr1:23857033-23858089	TRUE	NA		rs77210243		High-ICI hypermethylated probes
cg09773499	-0.109313351017661	0.317301062412224	-4.18039408900078	0.000111595594087611	0.0217411870552415	0.222132836640068	0.393614156518893	0.284300805501232	-0.109313351017661	19	7766717	R	II	FCER2	5'UTR	opensea	5'UTR-opensea		NA	NA				High-ICI hypermethylated probes
cg26679950	-0.109564323544956	0.730055587857173	-4.18029175563057	0.00011163315294373	0.0217411870552415	0.221807854303628	0.806543889199878	0.696979565654922	-0.109564323544956	11	46702401	F	II	ARHGAP1	Body	opensea	Body-opensea		NA	NA				High-ICI hypermethylated probes
cg15404791	0.256186896786319	0.482468345294826	4.18009799200219	0.000111704302546462	0.0217411870552415	0.221192525679137	0.303620889047773	0.559807785834092	0.256186896786319	6	16147669	F	II	MYLIP	3'UTR	opensea	3'UTR-opensea		NA	NA			rs79714658	Low-ICI hypermethylated probes
cg02149446	-0.243851068717438	0.326192756746283	-4.17987756533984	0.000111785296256603	0.0217411870552415	0.220492541336804	0.49642840849242	0.252577339774981	-0.243851068717438	19	47812519	R	II	C5AR1	TSS1500	opensea	TSS1500-opensea		NA	NA				High-ICI hypermethylated probes
cg00311768	-0.118549722612147	0.300814246695963	-4.17967612653074	0.000111859362883763	0.0217411870552415	0.219852870593315	0.383575373802555	0.265025651190409	-0.118549722612147	8	144698857	F	II	TSTA3	Body	shore	Body-shore	chr8:144699233-144700481	NA	NA				High-ICI hypermethylated probes
cg01858337	-0.112686932577041	0.698527703120266	-4.1794564836626	0.000111940177187559	0.0217411870552415	0.21915541010507	0.777195939070276	0.664509006493235	-0.112686932577042	11	840487	F	I	POLR2L	Body	shore	Body-shore	chr11:842293-843396	NA	NA				High-ICI hypermethylated probes
cg02247068	-0.137033028772105	0.261935497974634	-4.17941896078848	0.000111953988831261	0.0217411870552415	0.219036260672312	0.357600065230631	0.220567036458527	-0.137033028772105	15	41793472	R	II	ITPKA	Body	shore	Body-shore	chr15:41793562-41795305	TRUE	TRUE				High-ICI hypermethylated probes
cg15625675	0.188657772904762	0.63311794331268	4.17924762791288	0.000112017075073523	0.0217411870552415	0.218492220199307	0.501413460341432	0.690071233246193	0.188657772904761	5	114957464	F	II	TMED7-TICAM2	Body	shelf	Body-shelf	chr5:114961329-114961969	NA	NA				Low-ICI hypermethylated probes
cg25011257	-0.175695843336958	0.43803723370835	-4.17883316447676	0.000112169826752388	0.0217553546236381	0.217176202759056	0.560692822453019	0.384996979116061	-0.175695843336958	11	2193187	F	I	TH	TSS200	opensea	TSS200-opensea		NA	NA				High-ICI hypermethylated probes
cg03829542	-0.168397693183296	0.624583897776991	-4.17828997094951	0.000112370328299203	0.0217553546236381	0.215451535404596	0.742144551508725	0.573746858325429	-0.168397693183296	11	67029374	F	I		IGR	opensea	IGR-opensea		NA	NA		rs78526774		High-ICI hypermethylated probes
cg18788890	-0.244508435144615	0.459393790363135	-4.17819805040285	0.000112404292046365	0.0217553546236381	0.215159693941498	0.630088358294281	0.385579923149666	-0.244508435144616	19	15051363	R	II	OR7C2	TSS1500	opensea	TSS1500-opensea		NA	NA				High-ICI hypermethylated probes
cg10845886	-0.348625791326641	0.579342868480067	-4.17816647168475	0.00011241596237364	0.0217553546236381	0.215059434400992	0.822723137896779	0.474097346570138	-0.348625791326641	2	3471009	R	I	TTC15	Body	opensea	Body-opensea		NA	NA				High-ICI hypermethylated probes
cg20839149	-0.159568367884696	0.528503597251181	-4.17804210969403	0.000112461933401644	0.0217553546236381	0.214664600112412	0.639900382378233	0.480332014493537	-0.159568367884696	1	156786601	F	II	SH2D2A	5'UTR	shelf	5'UTR-shelf	chr1:156783523-156784037	NA	NA			rs72698634	High-ICI hypermethylated probes
cg15174117	-0.258685742516331	0.56089142868468	-4.17757950758796	0.000112633096732271	0.0217701811055195	0.213195945491961	0.741483362139477	0.482797619623146	-0.258685742516331	15	68913662	R	II	CORO2B	Body	opensea	Body-opensea		TRUE	NA				High-ICI hypermethylated probes
cg21451816	-0.130194679208514	0.48803371457125	-4.17729393247625	0.000112738886004656	0.0217701811055195	0.212289350861444	0.578924339679081	0.448729660470567	-0.130194679208514	7	1468848	R	I		IGR	opensea	IGR-opensea		TRUE	TRUE				High-ICI hypermethylated probes
cg26269677	-0.227837570304526	0.456155788014392	-4.17701490475283	0.000112842342949448	0.0217701811055195	0.211403571436582	0.615212205019439	0.387374634714913	-0.227837570304526	5	76251688	R	II	CRHBP	Body	shore	Body-shore	chr5:76249435-76250528	NA	NA				High-ICI hypermethylated probes
cg12710538	-0.245921424665236	0.572559980537116	-4.17694937090114	0.000112866654720431	0.0217701811055195	0.211195537090113	0.744240975114733	0.498319550449497	-0.245921424665236	17	27490340	F	II	MYO18A	Body	shelf	Body-shelf	chr17:27493203-27493880	TRUE	NA				High-ICI hypermethylated probes
cg15152362	-0.151286983945067	0.28808350076888	-4.1768306965553	0.000112910693504499	0.0217701811055195	0.210818814688819	0.393698942390908	0.242411958445841	-0.151286983945067	20	31173500	F	II		IGR	island	IGR-island	chr20:31170740-31173640	TRUE	NA		rs79093733		High-ICI hypermethylated probes
cg09608949	-0.11604065505127	0.195704763644149	-4.17601335104539	0.000113214454821357	0.0217999819950339	0.208224359697399	0.276714277547866	0.160673622496596	-0.11604065505127	11	117748189	R	II	FXYD6	TSS1500	shore	TSS1500-shore	chr11:117747102-117747717	NA	NA				High-ICI hypermethylated probes
cg16395953	0.205922227024869	0.216237802321542	4.17587383606096	0.000113266383840263	0.0217999819950339	0.207781530108096	0.0724807759079549	0.278403002932824	0.205922227024869	10	91152122	F	II	IFIT1	TSS200	opensea	TSS200-opensea		TRUE	NA				Low-ICI hypermethylated probes
cg04808027	-0.160878046877547	0.835863270464934	-4.17584214115417	0.000113278184255535	0.0217999819950339	0.20768092944604	0.948174359794542	0.787296312916996	-0.160878046877547	11	66102146	F	I	RIN1	Body	island	Body-island	chr11:66102024-66102279	NA	NA				High-ICI hypermethylated probes
cg19846389	-0.223359876440248	0.599972791638736	-4.1731023470224	0.000114302764543542	0.0219353111304867	0.19898616650519	0.755903271417777	0.532543394977529	-0.223359876440248	17	39722264	F	II	KRT9	3'UTR	opensea	3'UTR-opensea		NA	NA				High-ICI hypermethylated probes
cg22156852	0.108425175895377	0.730644976176337	4.17281372749338	0.000114411219377768	0.0219386560483055	0.198070394637318	0.654951928853149	0.763377104748526	0.108425175895377	1	112945682	R	II	CTTNBP2NL	5'UTR	opensea	5'UTR-opensea		NA	TRUE				Low-ICI hypermethylated probes
cg01804036	-0.152580532709679	0.509519760795179	-4.17277085990527	0.00011442733628434	0.0219386560483055	0.197934381121907	0.616038245894389	0.46345771318471	-0.152580532709679	12	117483310	F	II	TESC	Body	shore	Body-shore	chr12:117484305-117484627	NA	TRUE				High-ICI hypermethylated probes
cg07591186	-0.202869182434681	0.563277857188553	-4.17199470771679	0.000114719527079417	0.0219646324116552	0.195471867006562	0.704903512850501	0.502034330415819	-0.202869182434682	17	41178024	R	II	RND2	Body	shore	Body-shore	chr17:41176670-41176966	NA	NA				High-ICI hypermethylated probes
cg25472296	0.201666167766805	0.473925813296644	4.17191839806856	0.000114748293710663	0.0219646324116552	0.195229770094052	0.333139998063214	0.534806165830019	0.201666167766805	10	129076569	F	II	DOCK1	Body	opensea	Body-opensea		NA	TRUE				Low-ICI hypermethylated probes
cg13455829	-0.158990071223767	0.407846565773979	-4.1716521339497	0.000114848722750341	0.0219646324116552	0.194385048522395	0.518839634364156	0.359849563140389	-0.158990071223767	9	136213445	F	II	MED22	Body	shore	Body-shore	chr9:136214430-136215760	TRUE	NA				High-ICI hypermethylated probes
cg00911446	-0.173140763439733	0.427138002655984	-4.17142945442693	0.000114932778095409	0.0219646324116552	0.193678619434143	0.548009856378061	0.374869092938328	-0.173140763439733	1	7520079	F	II	CAMTA1	Body	opensea	Body-opensea		NA	NA				High-ICI hypermethylated probes
cg23878494	-0.209897099350768	0.604085554160692	-4.17124353584312	0.000115003002915078	0.0219646324116552	0.193088825198199	0.750617491443303	0.540720392092535	-0.209897099350768	11	63687937	F	I		IGR	shore	IGR-shore	chr11:63685489-63685968	NA	NA				High-ICI hypermethylated probes
cg20073553	-0.219388513088951	0.47857161717352	-4.17021136458833	0.000115393630345746	0.0219646324116552	0.189814679809368	0.631729635745052	0.4123411226561	-0.219388513088951	4	13545291	F	II	NKX3-2	Body	island	Body-island	chr4:13543562-13546494	NA	NA				High-ICI hypermethylated probes
cg04498921	-0.172553514793309	0.639343354080896	-4.17015821016001	0.000115413781562552	0.0219646324116552	0.189646079813822	0.759805241766791	0.587251726973482	-0.172553514793309	22	50157940	R	II		IGR	island	IGR-island	chr22:50157939-50158217	NA	NA				High-ICI hypermethylated probes
cg19983801	-0.224920321322429	0.422973696665808	-4.17010954521088	0.000115432233779544	0.0219646324116552	0.189491720889026	0.579993543626748	0.35507322230432	-0.224920321322429	3	195538730	F	I	MUC4	5'UTR	opensea	5'UTR-opensea		NA	TRUE				High-ICI hypermethylated probes
cg20546601	0.158260627112658	0.743322755483857	4.17008251654545	0.000115442483434809	0.0219646324116552	0.189405989844774	0.632838921461813	0.791099548574471	0.158260627112658	10	18622965	R	II	CACNB2	Body	opensea	Body-opensea		NA	TRUE				Low-ICI hypermethylated probes
cg09468328	-0.176274420232384	0.347601775726678	-4.16979966065555	0.000115549799396712	0.0219646324116552	0.188508828167802	0.470661276643625	0.294386856411241	-0.176274420232384	1	9352407	R	II	SPSB1	TSS1500	opensea	TSS1500-opensea		NA	NA				High-ICI hypermethylated probes
cg09357350	0.214703893843457	0.385391809284433	4.1697849762757	0.000115555373314676	0.0219646324116552	0.188462253111013	0.23550418528051	0.450208079123967	0.214703893843457	3	171894094	F	II	FNDC3B	Body	opensea	Body-opensea		NA	TRUE		rs74789523		Low-ICI hypermethylated probes
cg24850139	-0.104696632448306	0.613716024404087	-4.16963437669299	0.000115612553176332	0.0219646324116552	0.187984594874248	0.686806126301961	0.582109493853655	-0.104696632448306	12	132933950	F	II		IGR	shore	IGR-shore	chr12:132935371-132936152	NA	TRUE				High-ICI hypermethylated probes
cg21038785	0.231490801953117	0.640859691366921	4.16959025687965	0.000115629309846665	0.0219646324116552	0.187844661235893	0.479252905097764	0.710743707050881	0.231490801953117	15	53087068	R	II		IGR	shore	IGR-shore	chr15:53087211-53087488	NA	NA				Low-ICI hypermethylated probes
cg14897263	0.187746320135436	0.343224171644524	4.1695377067455	0.000115649271420344	0.0219646324116552	0.18767799033412	0.212155985889597	0.399902306025033	0.187746320135436	8	103421231	R	II	UBR5	Body	shelf	Body-shelf	chr8:103424045-103425154	NA	NA				Low-ICI hypermethylated probes
cg00910844	-0.191693751314824	0.638596728592716	-4.16904626907084	0.000115836109684858	0.021972162415378	0.186119370088766	0.772420668189858	0.580726916875033	-0.191693751314824	17	719674	R	II	NXN	Body	opensea	Body-opensea		NA	NA				High-ICI hypermethylated probes
cg13422004	-0.119173732077978	0.244281741877951	-4.16868734242309	0.00011597275394925	0.0219873378134068	0.184981073227692	0.327478498234275	0.208304766156297	-0.119173732077978	9	130687474	R	II	PIP5KL1	Body	shore	Body-shore	chr9:130689378-130690215	NA	NA			rs36045253	High-ICI hypermethylated probes
cg03100639	-0.153944451141233	0.316573364369817	-4.1685541692884	0.000116023493049946	0.0219873378134068	0.184558741502376	0.424044018940112	0.270099567798879	-0.153944451141233	16	31483137	F	II	TGFB1I1	TSS1500	shore	TSS1500-shore	chr16:31483276-31483646	NA	NA	high-CpG:31390567-31391258	rs45455396		High-ICI hypermethylated probes
cg22796051	0.129226550458713	0.816811273150469	4.1682725231606	0.000116130871448576	0.021997507521207	0.183665579747355	0.72659651150948	0.855823061968194	0.129226550458713	1	171771709	F	II		IGR	opensea	IGR-opensea		NA	TRUE				Low-ICI hypermethylated probes
cg22083053	0.288684446438579	0.319863737103824	4.16774077437656	0.000116333865069091	0.0220174055924977	0.181979369379825	0.118329312231608	0.407013758670188	0.288684446438579	4	13541444	F	II		IGR	shelf	IGR-shelf	chr4:13543562-13546494	NA	NA		rs59187142		Low-ICI hypermethylated probes
cg12406992	-0.206668847890935	0.379959008240016	-4.16771570137436	0.000116343445110115	0.0220174055924977	0.181899863883572	0.524237260541235	0.3175684126503	-0.206668847890935	1	156048214	R	II	MEX3A	Body	shore	Body-shore	chr1:156046343-156047384	NA	NA				High-ICI hypermethylated probes
cg15993652	-0.163931954034705	0.590131452303362	-4.16722156545851	0.000116532403708535	0.022042978827317	0.180333027052597	0.704574514554005	0.5406425605193	-0.163931954034705	1	1145618	F	I		IGR	island	IGR-island	chr1:1145568-1145878	NA	NA				High-ICI hypermethylated probes
cg00116430	-0.109785525676473	0.341999517393585	-4.16658111445396	0.000116777756494378	0.0220588226504229	0.178302382857455	0.41864224286584	0.308856717189367	-0.109785525676473	1	94188268	F	I		IGR	opensea	IGR-opensea		NA	TRUE				High-ICI hypermethylated probes
cg04582136	0.261833564058384	0.517443961585861	4.16613917396585	0.000116947353232997	0.0220776784069676	0.176901236084224	0.334654492337556	0.59648805639594	0.261833564058384	3	42233192	R	II	TRAK1	Body	opensea	Body-opensea		NA	TRUE			rs10703705	Low-ICI hypermethylated probes
cg09820373	-0.170234560157987	0.538931820846703	-4.1651734067246	0.000117318802842821	0.0221304007614045	0.17383958446085	0.657774815673977	0.48754025551599	-0.170234560157987	12	46126202	F	II	ARID2	Body	shelf	Body-shelf	chr12:46120726-46124104	NA	NA				High-ICI hypermethylated probes
cg10478221	-0.143932217047452	0.484903139442904	-4.1648793977935	0.000117432110439617	0.0221373821805976	0.172907594755544	0.585384121155276	0.441451904107824	-0.143932217047452	16	679917	F	II	WFIKKN1	TSS1500	shore	TSS1500-shore	chr16:677367-678128	NA	TRUE		rs17139376		High-ICI hypermethylated probes
cg05973132	-0.15774631717103	0.603564560269894	-4.16471993663033	0.000117493609291855	0.0221373821805976	0.17240212666768	0.713689347728915	0.555943030557885	-0.15774631717103	2	240451894	R	II		IGR	shelf	IGR-shelf	chr2:240449074-240449764	NA	NA				High-ICI hypermethylated probes
cg21029901	0.217191080169829	0.422103494399777	4.16447630740454	0.000117587629285183	0.0221373821805976	0.171629877002005	0.270479532771783	0.487670612941612	0.217191080169829	15	37112053	F	II	CSNK1A1P	TSS1500	shore	TSS1500-shore	chr15:37110361-37110778	NA	NA				Low-ICI hypermethylated probes
cg14982043	-0.161526184483793	0.509032691394756	-4.16435714821516	0.000117633641085893	0.0221373821805976	0.171252177459076	0.621796254147593	0.460270069663799	-0.161526184483793	5	314642	F	II	AHRR	Body	opensea	Body-opensea		NA	NA				High-ICI hypermethylated probes
cg04074945	0.224432435872015	0.585660092451476	4.16423674820088	0.000117680149751569	0.0221373821805976	0.170870550335783	0.42898084476724	0.653413280639254	0.224432435872015	11	46071833	F	II	PHF21A	Body	opensea	Body-opensea		NA	TRUE				Low-ICI hypermethylated probes
cg13054358	0.168474471165857	0.670062259984817	4.16375275371732	0.00011786728935746	0.0221522347597078	0.169336507800009	0.552448006529407	0.720922477695264	0.168474471165857	11	10339086	F	II		IGR	opensea	IGR-opensea		NA	TRUE		rs7104093		Low-ICI hypermethylated probes
cg00936309	-0.134072338771066	0.614808716726628	-4.16356052188582	0.000117941697101543	0.0221560511225718	0.168727244919535	0.708406387189448	0.574334048418381	-0.134072338771066	6	33141824	F	II	COL11A2	Body	opensea	Body-opensea		NA	NA		rs11963700		High-ICI hypermethylated probes
cg01736253	-0.185949229779808	0.621044069167606	-4.16299804533986	0.00011815967833937	0.0221736791241268	0.166944602589916	0.750857682410114	0.564908452630305	-0.185949229779808	17	80923777	R	I	B3GNTL1	Body	shore	Body-shore	chr17:80922368-80922812	NA	NA				High-ICI hypermethylated probes
cg24387285	-0.20102823789145	0.478881265335109	-4.16290379423115	0.000118196242462161	0.0221736791241268	0.166645906739338	0.619221733297065	0.418193495405615	-0.20102823789145	22	50747822	R	II		IGR	shore	IGR-shore	chr22:50745415-50746125	NA	NA	low-CpG:49090387-49090452			High-ICI hypermethylated probes
cg26795340	-0.146257097611265	0.666539454716495	-4.16251742360386	0.000118346247242812	0.0221913302419231	0.165421475711955	0.768643466256435	0.622386368645169	-0.146257097611266	12	50504814	R	II	GPD1	3'UTR	shore	3'UTR-shore	chr12:50505138-50506235	TRUE	TRUE				High-ICI hypermethylated probes
cg13900817	-0.100668014327675	0.70732406763753	-4.16187438782541	0.000118596309321396	0.0221923932803003	0.163383783503536	0.777601738017228	0.676933723689553	-0.100668014327674	5	172070153	F	II	NEURL1B	Body	shore	Body-shore	chr5:172068286-172069174	NA	TRUE				High-ICI hypermethylated probes
cg02896250	-0.186037167531117	0.639451242029452	-4.16179772271257	0.000118626156819143	0.0221923932803003	0.163140852747477	0.76932624577759	0.583289078246474	-0.186037167531116	16	28305533	F	II	SBK1	5'UTR	shore	5'UTR-shore	chr16:28303973-28304770	NA	NA				High-ICI hypermethylated probes
cg15499275	-0.146587282772574	0.614441409119679	-4.16149230963595	0.000118745133516725	0.0221923932803003	0.162173104467836	0.716775927281665	0.570188644509091	-0.146587282772574	1	9780620	R	II	PIK3CD	Body	opensea	Body-opensea		NA	NA				High-ICI hypermethylated probes
cg27543334	-0.193862960139726	0.626414099683205	-4.16129217719383	0.000118823159854791	0.0221923932803003	0.161538973273137	0.761752392610939	0.567889432471212	-0.193862960139727	1	31173966	F	II		IGR	opensea	IGR-opensea		TRUE	TRUE				High-ICI hypermethylated probes
cg14442405	-0.215958339622871	0.661109429443284	-4.16123822061331	0.000118844204605072	0.0221923932803003	0.161368011336806	0.811872798613967	0.595914458991097	-0.215958339622871	2	3045331	F	II		IGR	opensea	IGR-opensea		NA	NA		rs78851560		High-ICI hypermethylated probes
cg02640604	-0.15122141576826	0.383015941427257	-4.16121710492717	0.000118852441365751	0.0221923932803003	0.161301106386362	0.488585609039061	0.337364193270801	-0.15122141576826	16	29690271	F	II	QPRT	TSS200	opensea	TSS200-opensea		TRUE	NA				High-ICI hypermethylated probes
cg25783987	-0.177068182389243	0.648320647290538	-4.16119079417783	0.000118862705380064	0.0221923932803003	0.161217741139997	0.77193428405284	0.594866101663597	-0.177068182389243	7	4180723	F	II	SDK1	Body	opensea	Body-opensea		NA	NA				High-ICI hypermethylated probes
cg01982833	-0.226769617983665	0.400441917679522	-4.16074934158115	0.000119035047513809	0.0221946427010241	0.159819043895261	0.558752783064345	0.33198316508068	-0.226769617983665	12	27174596	F	II	MED21	TSS1500	shore	TSS1500-shore	chr12:27175342-27175843	NA	NA				High-ICI hypermethylated probes
cg16291069	-0.15822116123644	0.691404004584569	-4.16052517196217	0.000119122655599036	0.0221946427010241	0.159108813807133	0.801860286957178	0.643639125720738	-0.15822116123644	8	27317394	R	II	CHRNA2	3'UTR	shelf	3'UTR-shelf	chr8:27320914-27321276	NA	TRUE				High-ICI hypermethylated probes
cg17761772	-0.147701953308329	0.633912546821965	-4.16033355108995	0.000119197592827258	0.0221985054116307	0.158501722103164	0.737025231207025	0.589323277898695	-0.147701953308329	19	51627208	R	I	SIGLEC9	TSS1500	opensea	TSS1500-opensea		NA	NA				High-ICI hypermethylated probes
[truncated: 2,527 more rows]
